# Supplementary material for: Search AI: a Machine Learning algorithm for chronic kidney disease risk detection using eight readily available clinical features
Source: Research Square preprint supplement (doi:10.21203/rs.3.rs-7888843/v1), 2025-11-13

## Protocolo de investigación

### “Detección del riesgo de padecer enfermedad renal crónica en pacientes asintomáticos utilizando modelos predictivos creados por AI a partir de datos clínicos de rutina”

#### Investigador principal

Ana María Lerena

Asesora General

Pulso Salud

alllerena@pulsosalud.com

#### Equipo de investigación:

| Nombre y Apellido             | Posición o cargo      | Institución o Empresa |
|-------------------------------|-----------------------|-----------------------|
| Julián Martínez               | Ingeniero de ML       | Arkangel AI           |
| Alejandra Pérez               | Ingeniero de ML       | Arkangel AI           |
| Isabella Llano                | Ingeniería Biomédica  | Arkangel AI           |
| Dra. Natalia Castaño-Villegas | Epidemiología clínica | Arkangel AI           |
| Dr. Diego Caro                | Medical Manager       | AstraZeneca Colombia  |
| Dr. José Javier Arango        | Nefrólogo experto     | Universidad de Caldas |
| Jose Zea                      | CEO                   | Arkangel AI           |
|                               |                       |                       |

#### Patrocinador:

AstraZeneca Colombia SA, NAOS Campus Empresarial,  
Ak 9# 101-67 Of: 601, Bogotá, Colombia

#### Desarrollador:

Arkangel AI,  
Cra 17 # 103 31 UN 602, Bogotá, Colombia

#### Instituciones de salud participantes (únicamente data clínica)

Medisinú IPS- Montería, Colombia  
Somedyt IPS- Cartagena, Colombia  
Pulso Salud- San Borja, Perú

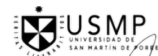

Dr. Amador Vargas Guerra  
Presidente  
Comité Institucional de Ética en Investigación  
de la Facultad de Medicina Humana de la  
Universidad de San Martín de Porres

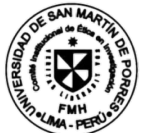

## Índice

|                                                               |           |
|---------------------------------------------------------------|-----------|
| <b>Abreviaturas</b>                                           | <b>4</b>  |
| <b>Resumen</b>                                                | <b>5</b>  |
| <b>Marco teórico e Introducción</b>                           | <b>6</b>  |
| <b>Hipótesis y Objetivos</b>                                  | <b>8</b>  |
| <b>Hipótesis</b>                                              | <b>8</b>  |
| <b>Objetivo General</b>                                       | <b>8</b>  |
| <b>Objetivos Específicos</b>                                  | <b>8</b>  |
| <b>Metodología</b>                                            | <b>9</b>  |
| <b>Diseño del estudio</b>                                     | <b>9</b>  |
| <b>Recolección y procesamiento de los datos</b>               | <b>9</b>  |
| <b>Criterios de selección</b>                                 | <b>9</b>  |
| <b>Definición del desenlace principal</b>                     | <b>9</b>  |
| <b>Estándar de referencia</b>                                 | <b>9</b>  |
| <b>Variables independientes</b>                               | <b>10</b> |
| <b>Desarrollo de los modelos predictivos por AI</b>           | <b>10</b> |
| <b>Almacenamiento y acceso a la base de datos</b>             | <b>11</b> |
| <b>Fase de entrenamiento</b>                                  | <b>11</b> |
| <b>Fase de testeo</b>                                         | <b>11</b> |
| <b>Plan de Análisis</b>                                       | <b>11</b> |
| <b>Análisis estadístico tradicional</b>                       |           |
| <b>Modelo Estadístico de Regresión</b>                        |           |
| <b>Modelo de Machine Learning para detectar riesgo de ERC</b> | <b>11</b> |
| <b>Consideraciones éticas</b>                                 | <b>12</b> |
| <b>Impacto Esperado</b>                                       |           |
| <b>Beneficios</b>                                             |           |
| <b>Riesgos</b>                                                | <b>13</b> |

|                    |           |
|--------------------|-----------|
| <b>Cronograma</b>  | <b>14</b> |
| <b>Presupuesto</b> | <b>15</b> |
| <b>Referencias</b> | <b>16</b> |

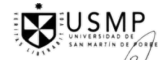

  
 Dr. Amador Vargas Guerra  
 Presidente  
 Comité Institucional de Ética en Investigación  
 de la Facultad de Medicina Humana de la  
 Universidad de San Martín de Porres

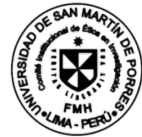

## Abreviaturas

AI: Inteligencia Artificial

AUC: Área debajo de la curva

CKD-EPI: Chronic Kidney Disease - Epidemiology Collaboration

ERC: Enfermedad Renal Crónica

ML: Machine Learning

PAS: Presión Arterial Sistólica

PAD: Presión Arterial Diastólica

TFGe: Tasa de Filtración Glomerular estimada

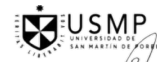

Dr. Amador Vargas Guerra  
Presidente  
Comité Institucional de Ética en Investigación  
de la Facultad de Medicina Humana de la  
Universidad de San Martín de Porres

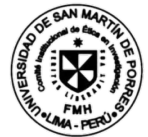

## Resumen

La Enfermedad Renal Crónica (ERC) tiene una prevalencia general del 10% y su tendencia global al alza es preocupante. Diversos esfuerzos se han realizado para mejorar el tamizaje de la ERC y la detección en estadios tempranos. Sin embargo, aún no han sido suficientes para atenuar su impacto creciente en la población.

El objetivo de la presente investigación es desarrollar un modelo predictivo usando Inteligencia Artificial (AI) a partir de datos clínicos rutinarios, de fácil acceso.

Se trata de un estudio observacional retrospectivo usando datos secundarios provenientes de tres instituciones de salud de Colombia y Perú. El modelo predictivo será construido por investigadores de Arkangel AI utilizando diversas arquitecturas de análisis a partir de siete variables independientes de fácil acceso: 1-duración de la diabetes (definida como la fecha de consulta menos la fecha de diagnóstico, según corresponda), 2-presencia o ausencia de diabetes, 3-presión arterial sistólica (PAS), 4-presión arterial diastólica (PAD), 5-presencia de diagnóstico de hipertensión, 6-Índice de masa corporal y 7-sexo. El valor de la TFG<sub>e</sub> (tasa de filtración glomerular estimada) es el desenlace, buscando predecir la probabilidad de que los valores de esta sean superiores, inferiores o iguales a 60 ml/min/1,73 m<sup>2</sup> y se define como positivo para riesgo de presentar ERC cuando es < 60 ml/min/1,73 m<sup>2</sup> estrictamente

Siendo la ERC asintomática en sus estadios tempranos y su progreso silencioso hasta estadios tardíos de difícil reversibilidad, el desarrollo de una nueva tecnología que permita la detección de pacientes en riesgo de ERC en etapas iniciales mediante variables obtenidas en controles médicos de rutina, será profundamente beneficioso no solo para la población de Colombia y Perú sino a nivel global.

**Palabras claves:** Enfermedad Renal Crónica, Inteligencia artificial, predicción, diagnóstico.

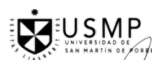

Dr. Amador Vargas Guerra  
Presidente  
Comité Institucional de Ética en Investigación  
de la Facultad de Medicina Humana de la  
Universidad de San Martín de Porres

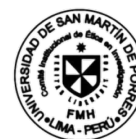

## Marco teórico e Introducción

La Enfermedad Renal Crónica (ERC) es una condición progresiva asintomática en sus estadios iniciales lo cual dificulta su diagnóstico precoz. A nivel mundial se estima que más del 10% de la población general padece de ERC (1). En Latinoamérica, la prevalencia tiene una tendencia mayor, siendo la más baja en Haití (6,2%) y la más alta en Puerto Rico (15,4%) de acuerdo al Atlas Global de Salud Renal emitido por la sociedad internacional de nefrología en el año 2021(2). En Perú y en Colombia se estima un valor cercano al 10% con una tendencia en aumento (3, 2). Los datos epidemiológicos son preocupantes, principalmente la tendencia al alza en los presupuestos públicos debido a la carga de esta enfermedad. De hecho, en Colombia, en el año 2023 se registró un aumento del 30% aproximadamente de la prevalencia con respecto al año 2022. (4)

La ERC es más prevalente en adultos mayores debido a que la función renal tiene un decrecimiento natural producto del envejecimiento. Sin embargo, existen factores que pueden acelerar dicha disminución como la hipertensión arterial, la obesidad y/o la diabetes mellitus. Los estadios avanzados de dicha patología se asocian a una alta morbilidad y mortalidad. Actualmente, la ERC está surgiendo como una de las principales causas de muerte a nivel global (1).

La ERC se clasifica en cinco etapas de acuerdo al valor de la Tasa de Filtración Glomerular (TFG). En la etapa 1, la TFG es mayor a 90 ml/min/1,73 m<sup>2</sup>, en etapa 2, entre 60 y 89 ml/min/1,73 m<sup>2</sup> y en la etapa 3, menor o igual a 59 ml/min/1,73 m<sup>2</sup>. Valores menores a partir de esta etapa, se asocian a un significativo aumento de eventos cardiovasculares, insuficiencia cardíaca y mortalidad (5). Por esta razón, en la práctica clínica se considera clave el diagnóstico y manejo tempranos.

Dada la característica asintomática de la ERC se están explorando nuevos algoritmos para detectar, diagnosticar y consecuentemente, tratar a los pacientes con ERC en estadios iniciales y prevenir el progreso de dicha patología al estadio terminal (diálisis) (6). De hecho, En el año 2020 y 2021 se realizaron dos estudios observacionales en el reino unido con personas mayores de 60 años sin diagnóstico de ERC que fueron sometidas a una pesquisa para la misma, estimándose que en un 40% de los casos se cumplían criterios para ERC al momento del estudio (7 y 8). Estos resultados sugieren que un número relevante de personas tienen ERC en un estadio temprano y lo desconocen, especialmente en adultos mayores.

Los centros de salud donde los pacientes se realizan sus controles son puntos estratégicos para mejorar el diagnóstico precoz de ERC y su manejo oportuno (9).

En los años 90' el paulatino uso masivo de computadores permitió el almacenamiento de las historias clínicas en formatos digitales, lo cual ha facilitado su rápida lectura y revisión por equipos multidisciplinarios. Este relevante avance tecnológico ha promovido la investigación retrospectiva de los datos almacenados, como la comparación de grupos de pacientes con cualidades en común buscando asociaciones. Por ejemplo, la presencia de factores de riesgo descritos como asociados a una patología

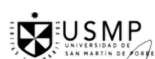

Dr. Amador Vargas Guerra  
Presidente  
Comité Institucional de Ética en Investigación  
de la Facultad de Medicina Humana de la  
Universidad de San Martín de Porres

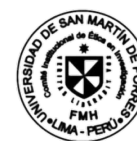

(hipertensión) y el diagnóstico (ERC). En otras palabras, se analizan grupos de personas, teniendo en cuenta que las conclusiones obtenidas están circunscritas a dichos grupos.

En los últimos años el desarrollo de diversas técnicas de Machine Learning (ML) se ha intensificado y sus aplicaciones en el ámbito de la salud crecieron exponencialmente (10). El objetivo del ML es entrenar a los algoritmos o modelos para que emitan un juicio sobre una determinada característica o condición de un individuo basándose en el análisis de una gran cantidad de registros proveniente de una población numerosa de personas. Esta capacidad de las máquinas de generar una predicción a partir de información aprendida es conocida como Inteligencia Artificial (su sigla en inglés, AI). El abordaje a los datos entre la metodología de AI y la investigación clínica epidemiológica, se podría resumir en una frase de Alexandre Dumas (1844): “todos para uno (AI) y uno para todos (epidemiología clínica). (11)

Una de las aplicaciones más difundidas de la AI es la detección y/o diagnóstico de una determinada patología. Con respecto a la ERC, al momento se han desarrollado diversos modelos para predecirla utilizando diferentes indicadores clínicos, poblaciones homogéneas y heterogéneas, además de diferentes tipos de estudios observacionales, sin hallar un modelo unificador ni validado por el grueso de la comunidad científica (12).

Considerando la gran cantidad de datos recolectados en la práctica clínica diaria para describir las condiciones de los pacientes, el bajo costo y la inminente necesidad de facilitar el tamizaje diagnóstico de ERC, se construirá un modelo predictivo de AI para detectar riesgo de desarrollar ERC, usando para el entrenamiento de dicho modelo la información de las variables mencionadas, frecuentemente recolectadas en las visitas de revisión y control médico.

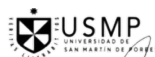

Dr. Amador Vargas Guerra  
Presidente  
Comité Institucional de Ética en Investigación  
de la Facultad de Medicina Humana de la  
Universidad de San Martín de Porres

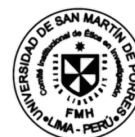

## Hipótesis y objetivos

### Hipótesis

El uso de siete indicadores clínicos (presión arterial sistólica y diastólica, índice masa corporal, diagnóstico de diabetes, sexo, tiempo de duración de diabetes, diagnóstico de hipertensión) para el entrenamiento de un modelo con fines predictivos de AI, permite detectar pacientes asintomáticos con alto riesgo de ERC.

### Objetivo General

Desarrollar un algoritmo o modelo predictivo basado en AI a partir de datos clínicos de rutina para clasificar a pacientes en riesgo de presentar enfermedad renal (definido en este estudio como la presencia de una TFGe menor a 60 ml/min//1,73 m<sup>2</sup>)

### Objetivos específicos

- Descripción de las características clínicas y demográficas de los pacientes en las bases de datos utilizadas.
- Desarrollo y entrenamiento de un modelo predictivo de AI, usando siete características clínicas de fácil acceso.
- Evaluar el desempeño de los modelos predictivos usando data desconocida para el modelo de acuerdo con las características operativas de sus resultados.

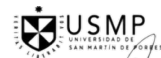

Dr. Amador Vargas Guerra  
Presidente  
Comité Institucional de Ética en Investigación  
de la Facultad de Medicina Humana de la  
Universidad de San Martín de Porres

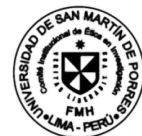



## Metodología

### Diseño del estudio

Es un estudio observacional, transversal y retrospectivo, basado en datos secundarios, a partir de información clínica proveniente de tres instituciones de salud: Somedyt y Medisinú en Colombia (Instituciones Prestadoras de salud de 2<sup>do</sup> y 3<sup>er</sup> nivel de complejidad) y PulsoSalud en Perú (Aseguradora de Salud) recolectada por las instituciones entre 2019 y 2024.

### Recolección y procesamiento de los datos

Los datos estuvieron disponibles para el procesamiento de la información y entrenamiento de los modelos desde el primer semestre de 2024. La información de las tres instituciones se unificó para conformar una base de datos. Dentro de los registros se encuentra datos clínicos y demográficos de pacientes con y sin enfermedad renal. En los pacientes con más de un registro, se considerará el registro más reciente para todas las variables. La cantidad inicial de registros fue 645412.

### Criterios de selección

Todos los registros de pacientes mayores de 18 años de edad serán considerados como incluidos, excepto aquellos que no cuenten con al menos una medición de la creatinina sérica. Esto con el fin de calcular en toda la muestra del estudio la TFGe usando la ecuación CKD-EPI (13). Se estandarizará la estimación de TFGe mediante dicha fórmula.

### Definición del desenlace principal

El desenlace principal es la probabilidad de presentar enfermedad renal, que se define como una Tasa de filtración glomerular estrictamente menor a 60 ml/min/1,73 m<sup>2</sup>. Si la probabilidad que el modelo asigna al desenlace es < a 0,5, será clasificado como “sin riesgo” y si la probabilidad es mayor o igual a 0,5, será clasificado como “con riesgo” de sufrir enfermedad renal. No se proponen desenlaces secundarios.

### Estándar de referencia

El estándar para la predicción del valor de TFGe es el calculado con la ecuación CKD-EPI (13) en su última actualización (2021), que no incluye la raza como variable. Esta se calculará con el valor de la creatinina más reciente de cada registro. Si ambos coinciden, se considerará un acierto del modelo, si discrepan se considerará un desacuerdo. La ecuación se describe a continuación:

$$\text{TFGe: } 141 \times \min([\text{Cre}]/K, 1) \times \max([\text{Cre}]/K, 1) - 1,209 \times 0,993^{\text{Edad}} \times 1,018 \text{ (si es mujer)}$$

[Cre]: creatinina sérica mg/mL

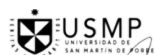

Dr. Amador Vargas Guerra  
Presidente  
Comité Institucional de Ética en Investigación  
de la Facultad de Medicina Humana de la  
Universidad de San Martín de Porres

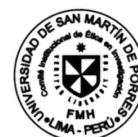

K: 0,7 (mujeres) o 0,9 (hombres)  
a: -0,329 (mujeres) o -0,411 (hombres)  
min: indica el mínimo de  $[Cre]/K$  o 1  
max: indica el máximo de  $[Cre]/K$  o 1

### Variables independientes

Las variables elegidas son las siguientes:

1. Duración de la diabetes (definida como la fecha de consulta menos la fecha de diagnóstico, en pacientes diabéticos)
2. Presencia o ausencia de diabetes (si-no)
3. Presión arterial sistólica en mmHg
4. Presión arterial diastólica en mmHg
5. Presencia de diagnóstico de hipertensión (si-no)
6. Índice de masa corporal en  $Kg/m^2$
7. Sexo (masculino-femenino)
8. TFG (únicamente en la fase de entrenamiento del modelo, ya que es la variable que se busca predecir y se define ERC como una  $TFGe < 60 \text{ ml/min/1.73m}^2$ )

### Desarrollo de los modelos predictivos por AI

#### Contexto

Arkangel AI es una empresa emergente que se creó con el objetivo de implementar la AI como una herramienta al servicio del diagnóstico temprano de patologías con altas morbimortalidades como ERC. Con eso en mente, desarrolló una plataforma digital (<https://www.arkangel.ai/>), que ofrece apoyo en el diseño y entrenamiento de modelos de inteligencia artificial para un público no experto en código usando algoritmos previamente escritos (en el lenguaje de programación Python) por ingenieros de ML de la empresa. En la práctica, los Ingenieros trabajan en este “taller digital” con la intención de probar diferentes acercamientos, que puedan esclarecer las asociaciones más precisas entre los datos. En esta fase se realiza el proceso conocido como Entrenamiento del modelo, y consiste en determinar la mejor arquitectura que se adapte a los datos en cuestión, usando métodos de AI. Estos algoritmos de análisis se convierten en los modelos predictivos finales, después de probar decenas de ellos. Luego, se continúa con una fase de prueba o “testeo” de dicha capacidad predictiva con datos que no se usaron previamente en el entrenamiento, es decir, que el modelo no conoce, para asegurar la validez de las predicciones

Finalmente, en el caso de este proyecto, se realiza una comparación entre la clasificación predicha por el modelo de AI y la clasificación clínica de los pacientes de acuerdo con su TFG calculado con la fórmula CKD EPI (estándar de referencia). En este estudio la clasificación es: ausencia o presencia de riesgo de ERC, definido como una  $TFGe < 60 \text{ ml/min/1.73m}^2$ .

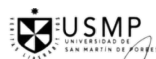

Dr. Amador Vargas Guerra  
Presidente  
Comité Institucional de Ética en Investigación  
de la Facultad de Medicina Humana de la  
Universidad de San Martín de Porres

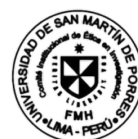

## Almacenamiento y acceso a la base de datos

El almacenamiento, acceso y manipulación de los datos están certificados por la normativa internacional ISO 270001 sobre Seguridad de datos a nivel global. Toda la información clínica recibida ha sido previamente anonimizada para asegurar que no se pueda identificar a ningún individuo con los datos suministrados. La información se encuentra almacenada en un único servidor virtual privado, al que sólo tienen llave de acceso los investigadores. Dicha data es exclusivamente utilizada en el entrenamiento de los modelos de AI, y no está disponible al público o a otros miembros de Arkangel AI que no hagan parte del grupo de investigación (14).

## Fase de Entrenamiento

Para esta etapa de trabajo se utiliza aproximadamente un 70 a 80% de los datos clínicos obtenidos. Las arquitecturas de Machine Learning exploradas por nuestra aplicación son: KNeighborsClassifier (KNC), Support Vector Machine (SVM), Extreme Gradient Boosting (XGBoost), Logistic Regression (LR), Gradient Boosting (GB), Deep Learning (DL) y Deep Fully Connected Neural Networks (DNN). Cada modelo generado será categorizado de acuerdo con su efectividad predictiva, eligiéndose el mejor para la fase de testeo con datos desconocidos. La elección del modelo se basa en métricas objetivas de evaluación dadas por la sensibilidad, especificidad, precisión, puntuación F1 y Área bajo la curva (AUC).

## Fase de testeo

En esta etapa el 20 a 30% de los datos clínicos restantes son leídos y analizados por los modelos predictivos por primera vez. La categorización, medición y selección de los resultados se realiza teniendo en cuenta las características operativas del modelo, mencionadas anteriormente. Además, la identificación de las variables más relevantes para la predicción en el poder predictivo se realizará por medio de Shapely Additive Explanations (SHAP). Este último es un valor que permite evaluar el peso o importancia de cada una de las variables usadas dentro de un modelo de ML.

## Plan de Análisis

### Análisis estadístico tradicional

La población, como se mencionó anteriormente, se compone de la totalidad de registros clínicos suministrados entre 2023 y 2024 por las empresas de salud descritas. Entre estos se seleccionaron todos los registros de mayores de 18 años y se excluyeron aquellos sin al menos un valor de creatinina sérica. Esta información se fusionó en una base de datos única, a partir de las variables seleccionadas por su relevancia clínica para ser parte del modelo final.

Estas variables se presentarán y analizarán de acuerdo con su naturaleza cualitativa o cuantitativa; para las variables cuantitativas se describirán valores máximos y mínimos, porcentaje de datos faltantes, medidas de resumen como la desviación estándar para variables cuantitativas con distribución normal de

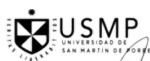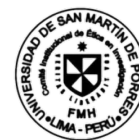

los datos, o mediana y rangos intercuartílicos, para las que no distribuyen normal. Las variables categóricas se describirán con frecuencias absolutas y relativas (porcentajes), moda y porcentaje de datos faltantes.

Las asociaciones entre variables independientes cuantitativas se explorarán usando la correlación de Pearson o Spearman, de acuerdo con su distribución. Para las asociaciones entre variables cualitativas y cuantitativas se usará la prueba de hipótesis t de Student o U de Mann-Whitney según su distribución; para las variables categóricas se empleará la prueba de Chi-cuadrado ( $X^2$ ) en las comparaciones de grupos de datos.

### Modelo estadístico de regresión

Se usará análisis multivariado para explorar las asociaciones entre las variables independientes y la dependiente (TFGe), controlando la posible confusión e interacción de estas cuando se encuentran presentes en un mismo modelo. El criterio clínico será el definitorio para la inclusión de las variables en el modelo final, independiente de los resultados estadísticos. Esta decisión se basa en la amplia sustentación de esto factores en la literatura científica y la opinión de expertos (15, 16, 17). La estrategia para usar será una regresión logística, previa confirmación de los supuestos de independencia de los errores y de no multicolinealidad. También se describirá el supuesto de homocedasticidad. En caso de no poder confirmar dichos supuestos, se recurrirá a otras pruebas de la familia de los Modelos Lineales Generalizados, en concreto, la regresión binomial. La variabilidad de los modelos será explorada con las métricas de bondad de ajuste, como el AIC,  $R^2$  de Nagelkerke y de McFadden, interpretadas como el porcentaje de variabilidad del desenlace que puede ser explicada por el modelo en cuestión.

### Modelo de Machine Learning para detectar riesgo de ERC

El modelo predictivo se desarrollará con las estrategias de AI mencionadas en la sección anterior. Los resultados de las predicciones de dichos modelos, en función de su capacidad para distinguir un paciente sano de uno con alto riesgo de ERC se evaluarán con las características operativas (sensibilidad, especificidad, valores predictivos) y la Curva ROC (receiver operating characteristic) también conocida en español como Curva de eficacia diagnóstica. En un primer lugar se tabulan los resultados obtenidos por el modelo en la fase de testeo para cada individuo (presencia o ausencia de alto riesgo de ERC) y se compara con la condición real con base en el valor real de TFGe sérica. Con cada resultado acumulativo de registros, se calcula la cantidad de Resultados Verdaderos Positivos, Falsos Positivos, Verdaderos Negativos y Falsos Negativos, presentando los resultados en matrices de confusión

Las curvas ROC se construyen en un plano cartesiano con la representación en el eje de las abscisas de la sensibilidad que está definida por Verdadero positivo/ (Verdadero positivo + Falso negativo) y el complementario de la especificidad que está definido por Falso Positivo/(Falso Positivo + Verdadero Negativo) (18).

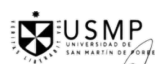

Dr. Amador Vargas Guerra  
Presidente  
Comité Institucional de Ética en Investigación  
de la Facultad de Medicina Humana de la  
Universidad de San Martín de Porres

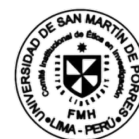

Cuanto más cercano a 1 sea el valor del área debajo de la curva (AUC), más potente es el modelo para predecir o discriminar a un paciente sano de uno con alto riesgo de ERC. El modelo se considerará de buena capacidad predictiva cuando AUC tiene un valor de al menos 0,75. Los valores de sensibilidad y especificidad se expresarán con un intervalo de confianza de 95% (18).

La información se presentará en tablas simples y graficas para las curvas AUC y para los valores SHAP.

### Consideraciones éticas

Somos conscientes de la relevancia del consentimiento informado de los pacientes participantes en la investigación clínica. Sin embargo, dadas la congruencia entre las características de la investigación presentada en este protocolo y los argumentos expuestos en el capítulo 10 de la Guía Ética Internacional para Investigaciones Relacionadas con la Salud en Seres Humanos para eximir a los investigadores de la toma de consentimiento informado a los pacientes (ver tabla), se solicita la prescindencia de dicho documento (19).

| Argumentos de la CIOMS                                                                               | Características del presente protocolo                                                                                                                                                                                                                                                                                                                                                                          |
|------------------------------------------------------------------------------------------------------|-----------------------------------------------------------------------------------------------------------------------------------------------------------------------------------------------------------------------------------------------------------------------------------------------------------------------------------------------------------------------------------------------------------------|
| La investigación no sería factible o practicable de llevarse a cabo sin la renuncia de la toma de CI | Más de 500.000 registros de pacientes disponibles en las instituciones de salud mencionadas, con el único fin de usarlos en investigación.                                                                                                                                                                                                                                                                      |
| La investigación tiene importante valor social                                                       | Prevalencia de ERC >10% población general, tendencia en alza. Alto % de pacientes sin diagnóstico. Morbimortalidad de la enfermedad renal crónica                                                                                                                                                                                                                                                               |
| La investigación no plantea más que riesgos mínimos para los participantes                           | Toda investigación con humanos conlleva algún tipo de riesgo. Sin embargo, se trata de un estudio sin intervenciones directas, con riesgo clasificado como mínimo. Los datos recibidos son anonimizados por las instituciones de salud antes de ser recibidos. No se tienen ningún tipo de contacto con el paciente, ni se modificarán de ninguna forma los datos ya recopilados en cada registro participante. |

Arkangel AI posee un Sistema de Gestión de Seguridad de la Información certificado por la norma Internacional ISO 27001, el cual protege la confidencialidad de los datos no sensibles utilizados, exige la

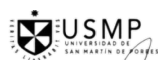

Dr. Amador Vargas Guerra  
Presidente  
Comité Institucional de Ética en Investigación  
de la Facultad de Medicina Humana de la  
Universidad de San Martín de Porres

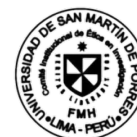

verificación continua de los mecanismos internos de seguridad informática, permite la trazabilidad de las modificaciones sobre las bases de datos y restringe el acceso a dicha información (14).

La información será almacenada y también analizada en la “nube” internacional Amazon Web Services, la cual posee estrictos estándares de seguridad. Además, cuenta con una política de uso responsable de AI, es decir, en actividades legales, con respeto a los derechos ajenos tanto de adultos como niños, sin promover la violencia ni la difusión de información engañosa o no deseada ni el ingreso no autorizado a dispositivos o datos (20).

En resumen, considerando los principios éticos expuestos por el Dr. Ezekiel Emanuel para una apropiada investigación clínica, este proyecto de investigación se constituye por una asociación colaborativa entre instituciones de salud y Arkangel AI para generar una herramienta tecnológica con un potencial valor social muy significativo en la salud renal. Los riesgos son mínimos con respecto a los beneficios debido a que el almacenamiento y manejo de la información, por profesionales idóneamente capacitados, se realizará con los mayores estándares de ciberseguridad y con la protección de los datos sensibles de los pacientes respetando sus derechos. Su validez científica en diseño y metodología está sustentada por investigaciones previas en el uso de AI en el diagnóstico temprano de diversas patologías. Los resultados serán sometidos a la evaluación de pares en el proceso de publicación en revistas internacionales. De esta manera, consideramos que la presente propuesta es robusta desde el punto de vista clínico, metodológico, regulatorio y ético. (21).

## **Impacto esperado**

### Beneficios

Esta investigación tiene el potencial de incrementar significativamente la identificación de riesgo de ERC en pacientes asintomáticos atendidos en instituciones estableciendo alertas de sospecha de ERC. Esto permitirá: 1-optimizar los recursos de los laboratorios bioquímicos (en reactivos y horas de trabajo) en la confirmación del diagnóstico de ERC, 2- iniciar el tratamiento farmacológico renoprotector, 3- implementar hábitos saludables a tiempo, 4-reducir el número de pacientes diagnosticados en etapas tardías con necesidad de diálisis y 5-identificar grupos de riesgo en los cuales realizar actividades educativas de prevención, 6-mejora en la calidad de vida del paciente y la de su círculo cercano, 7-reducción o modificación de la carga económica para el sistema de salud a largo plazo

Un aspecto adicional no menos importante es que las aplicaciones de AI en el diagnóstico precoz de enfermedades crónicas está teniendo un gran impacto en el sector público el cual atiende personas de diverso origen sociocultural. El desarrollo de algoritmos para predecir condiciones de salud sin la utilización de datos sensibles, ni laboratorios de difícil acceso y costosos, favorece la equidad en el diagnóstico y puede disminuir los eventuales sesgos socioculturales y clínicos en la atención médica (22).

### Riesgos

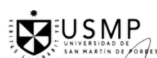

Dr. Amador Vargas Guerra  
Presidente  
Comité Institucional de Ética en Investigación  
de la Facultad de Medicina Humana de la  
Universidad de San Martín de Porres

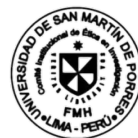

Uno de los principales riesgos con esta herramienta de AI, en el caso que sea implementada, es el sobrediagnóstico, ya que, al ser aplicada sobre población sin factores de riesgo conocidos, el algoritmo debe presentar una alta sensibilidad al diagnóstico y/o detección del riesgo. Como se explicó, el modelo pretende ser parte de una cadena de manejo clínico para la enfermedad renal en las instituciones participantes. Al poseer una alta sensibilidad, el algoritmo podría marcar como positivo a un paciente sin alteración renal. La consecuencia de esto podría ser una carga emocional para el paciente y su familia, y la realización de paraclínicos de confirmación que se pudieron evitar con una herramienta mas específica. Sin embargo, dada la alta carga de enfermedad en el mundo y en Colombia, y el propósito de la herramienta, es un riesgo que se asume por parte de los patrocinadores, desarrolladoras e instituciones de salud participantes, ya que el beneficio de detectar un paciente con alteración renal crónica sobrepasa el riesgo de un diagnóstico errado, que se descartará tan pronto se le realicen las pruebas de seguimiento al paciente (segunda creatinina).

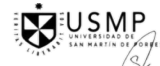

Dr. Amador Vargas Guerra

Presidente

Comité Institucional de Ética en Investigación  
de la Facultad de Medicina Humana de la  
Universidad de San Martín de Porres

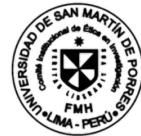

## Cronograma

El desarrollo del proyecto ha ido avanzando desde el momento en que se compartieron los datos. Los análisis estadísticos y el entrenamiento de diferentes modelos ya se han explorado. En el momento nos encontramos haciendo pruebas con algunos modelos que tuvieron buen desempeño. Sin embargo, aún no tenemos ningún resultado final y aceptaríamos con agrado cualquier comentario u oportunidad de mejora de parte de su comité de expertos en bioética.

| Actividad                                                | Q4 2023 | Q1 2024 | Q2 2024 | Q3 2024 | Q4 2024 | Q1 2025 | Q2 2025 |
|----------------------------------------------------------|---------|---------|---------|---------|---------|---------|---------|
| Desarrollo de protocolos de investigación                |         |         |         |         |         |         |         |
| Revisión de la literatura y estado del arte              |         |         |         |         |         |         |         |
| Recepción de bases de datos anonimizadas                 |         |         |         |         |         |         |         |
| Escritura de secciones de introducción y métodos         |         |         |         |         |         |         |         |
| Control de calidad bases de datos                        |         |         |         |         |         |         |         |
| Procesamiento base de datos                              |         |         |         |         |         |         |         |
| Entrenamiento de modelos                                 |         |         |         |         |         |         |         |
| Tests de modelos                                         |         |         |         |         |         |         |         |
| Selección de modelos                                     |         |         |         |         |         |         |         |
| Análisis de resultados                                   |         |         |         |         |         |         |         |
| Escritura sección de resultados                          |         |         |         |         |         |         |         |
| Escritura discusión                                      |         |         |         |         |         |         |         |
| Sometimiento a revista indexada                          |         |         |         |         |         |         |         |
| Publicación en revista indexada y divulgación científica |         |         |         |         |         |         |         |

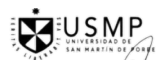

Dr. Amador Vargas Guerra  
Presidente  
Comité Institucional de Ética en Investigación  
de la Facultad de Medicina Humana de la  
Universidad de San Martín de Porres

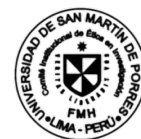



## Presupuesto

| Recursos / Gastos                                                                 | Unidad    | Horas de trabajo | Valores      |
|-----------------------------------------------------------------------------------|-----------|------------------|--------------|
| Recurso humano (Machine Learning, análisis de datos, evidencia médica científica) | \$ 150.00 | 450              | \$ 67,500.00 |
| Costos de computación (GPU, AWS etc.)                                             | \$ 5.00   | 3000             | \$ 15,000.00 |
| <b>TOTAL</b>                                                                      |           |                  | \$ 82,500.00 |

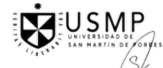

Dr. Amador Vargas Guerra  
Presidente  
Comité Institucional de Ética en Investigación  
de la Facultad de Medicina Humana de la  
Universidad de San Martín de Porres

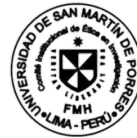

## Referencias

- 1-Kovesdy CP. Epidemiology of chronic kidney disease: an update 2022. *Kidney Int Suppl* (2011). 2022 Apr;12(1):7-11. doi: 10.1016/j.kisu.2021.11.003. Epub 2022 Mar 18. PMID: 35529086; PMCID: PMC9073222
- 2-Correa-Rotter R, Méndez Durán A, Vallejos A, Rico-Fontalvo J, Cusumano AM, Rosa-Diez GJ, Sánchez Polo V, Goecke H, Arango JJ, Cerón VV, Diná E, Fonseca FH, Valdés RA, Vanoni M. Unmet Needs of CKD in Latin America: A Review from Expert Virtual Working Group. *Kidney Int Rep*. 2023 Feb 27;8(5):954-967. doi: 10.1016/j.ekir.2023.02.1082. PMID: 37180514; PMCID: PMC10166742.
- 3-Loza Munarriz C Insuficiencia Renal en el Perú Boletín epidemiológico del Perú del Centro Nacional de Epidemiología Prevención y Control de Enfermedades SE 10-2022
- 4-Fondo Colombiano de Enfermedades de Alto Costo. Cuenta de Alto Costo (CAC) Situación de la Enfermedad Renal Crónica, la hipertensión arterial y la diabetes mellitus en Colombia 2023. Bogotá D. C. 2024
- 5-Matsushita K, Coresh J, Sang Y, Chalmers J, Fox C, Guallar E, Jafar T, Jassal SK, Landman GW, Muntner P, Roderick P, Sairenchi T, Schöttker B, Shankar A, Shlipak M, Tonelli M, Townend J, van Zuilen A, Yamagishi K, Yamashita K, Gansevoort R, Sarnak M, Warnock DG, Woodward M, Ärnlöv J; CKD Prognosis Consortium. (2006). Estimated glomerular filtration rate and albuminuria for prediction of cardiovascular outcomes: a collaborative meta-analysis of individual participant data. *Lancet Diabetes Endocrinology*. 3(7):514-525.
- Shlipak MG, Tummalaipalli SL, Boulware LE, Grams ME, Ix JH, Jha V, Kengne AP, Madero M, Mihaylova B, Tangri N, Cheung M, Jadoul M, Winkelmayer WC, Zoungas S; Conference Participants. The case for early identification and intervention of chronic kidney disease: conclusions from a Kidney Disease: Improving Global Outcomes (KDIGO) Controversies Conference. *Kidney Int*. 2021 Jan;99(1):34-47. doi: 10.1016/j.kint.2020.10.012. Epub 2020 Oct 27. PMID: 33127436.
- 7-Hirst JA, Hill N, O'Callaghan CA, Lasserson D, McManus RJ, Ogburn E, Mena JMO, Shine B, Taylor CJ, Vazquez-Montes MD, Yang Y, Hobbs FR. Prevalence of chronic kidney disease in the community using data from OxRen: a UK population-based cohort study. *Br J Gen Pract*. 2020 Mar 26;70(693):e285-e293. doi: 10.3399/bjgp20X708245. PMID: 32041766; PMCID: PMC7015167.
- 8-Carpio, E.M., Ashworth, M., Asgari, E. *et al*. Hypertension and cardiovascular risk factor management in a multi-ethnic cohort of adults with CKD: a cross sectional study in general practice. *J Nephrol* **35**, 901–910 (2022). <https://doi.org/10.1007/s40620-021-01149-0>
- 9-Martínez-Castelao A, Górriz JL, Bover J, Segura-de la Morena J, Cebollada J, Escalada J, Esmatjes E, Fácila L, Gamarra J, Gràcia S, Hernández-Moreno J, Llisterri-Caro JL, Mazón P, Montañés R, Morales-Olivas F, Muñoz-Torres M, de Pablos-Velasco P, de Santiago A, Sánchez-Celaya M, Suárez C, Tranche S. Documento de consenso para la detección y manejo de la enfermedad renal crónica [Consensus document for the detection and management of chronic kidney disease]. *Aten Primaria*. 2014 Nov;46(9):501-19. Spanish. doi: 10.1016/j.aprim.2014.09.002. Epub 2014 Oct 5. PMID: 25288498; PMCID: PMC6983829.

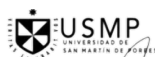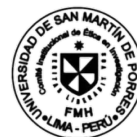

- 10-Kurniawan, M. H., Handiyani, H., Nuraini, T., Hariyati, R. T. S., & Sutrisno, S. (2024). A systematic review of artificial intelligence-powered (AI-powered) chatbot intervention for managing chronic illness. *Annals of Medicine*, 56(1). <https://doi.org/10.1080/07853890.2024.2302980>
- 11-Dumas Alexandre y Maquet Auguste. Los tres mosqueteros (Les trois mousquetaires) Editorial Baudry 607 pág., 1844
- 12-Pan Q, Tong M. Artificial intelligence in predicting chronic kidney disease prognosis. A systematic review and meta-analysis. *Ren Fail.* 2024 Dec;46(2):2435483. doi: 10.1080/0886022X.2024.2435483. Epub 2024 Dec 11. PMID: 39663146; PMCID: PMC11636155.
- 13- Levey AS, Stevens LA, Schmid CH, Zhang YL, Castro AF 3rd, Feldman HI, Kusek JW, Eggers P, Van Lente F, Greene T, Coresh J; CKD-EPI (Chronic Kidney Disease Epidemiology Collaboration). A new equation to estimate glomerular filtration rate. *Ann Intern Med.* 2009 May 5;150(9):604-12. doi: 10.7326/0003-4819-150-9-200905050-00006. Erratum in: *Ann Intern Med.* 2011 Sep 20;155(6):408. PMID: 19414839; PMCID: PMC2763564.
- 14-ISO/IEC 27001:2022 Seguridad de la información, ciberseguridad y protección de la privacidad - Sistemas de gestión de la seguridad de la información. [https://www.itgovernance.co.uk/iso27001#:~:text=ISO%2FIEC%2027001%20is%20the,\(information%20security%20management%20system\)](https://www.itgovernance.co.uk/iso27001#:~:text=ISO%2FIEC%2027001%20is%20the,(information%20security%20management%20system))
- 15-Kazancioğlu R. Risk factors for chronic kidney disease: an update. *Kidney Int Suppl* (2011). 2013 Dec;3(4):368-371. doi: 10.1038/kisup.2013.79. PMID: 25019021; PMCID: PMC4089662.
- 16-Tsai WC, Wu HY, Peng YS, Ko MJ, Wu MS, Hung KY, Wu KD, Chu TS, Chien KL. Risk Factors for Development and Progression of Chronic Kidney Disease: A Systematic Review and Exploratory Meta-Analysis. *Medicine (Baltimore).* 2016 Mar;95(11):e3013. doi: 10.1097/MD.0000000000003013. PMID: 26986114; PMCID: PMC4839895.
- 17-Chen TK, Knicely DH, Grams ME. Chronic Kidney Disease Diagnosis and Management: A Review. *JAMA.* 2019 Oct 1;322(13):1294-1304. doi: 10.1001/jama.2019.14745. PMID: 31573641; PMCID: PMC7015670.
- 18-Martínez Pérez JA, Pérez Martin PS. La curva ROC [ROC curve]. *Semergen.* 2023 Jan-Feb;49(1):101821. Spanish. doi: 10.1016/j.semerg.2022.101821. Epub 2022 Sep 22. PMID: 36155265.
- 19-Council for International Organizations of Medical Sciences (CIOMS) in collaboration with the World Health Organization (WHO) 2016. Guideline 10: Modifications and waivers of informed consent. International Ethical Guidelines for Health-related Research Involving Humans
- 20-Amazon Web Services Política de AI de AWS [https://d1.awsstatic.com/legal/ai-responsible-ai-policy/AWS\\_Responsible\\_AI\\_Policy\\_2023.09.28\\_ES-LA.pdf](https://d1.awsstatic.com/legal/ai-responsible-ai-policy/AWS_Responsible_AI_Policy_2023.09.28_ES-LA.pdf)
- 21-Suárez Obando, Fernando. (2015). UN MARCO ÉTICO AMPLIO PARA LA INVESTIGACIÓN CIENTÍFICA EN SERES HUMANOS: MÁS ALLÁ DE LOS CÓDIGOS Y LAS DECLARACIONES: LA PROPUESTA DE EZEKIEL J. EMANUEL. *Persona y Bioética*, 19(2), 182-197. <https://doi.org/10.5294/PEBI.2015.19.2.2>

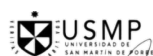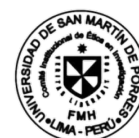

22-Gurevich E, El Hassan B, El Morr C. Equity within AI systems: What can health leaders expect? Healthc Manage Forum. 2023 Mar;36(2):119-124. doi: 10.1177/08404704221125368. Epub 2022 Oct 13. PMID: 36226507; PMCID: PMC9976641.

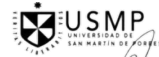

  
Dr. Amador Vargas Guerra  
Presidente  
Comité Institucional de Ética en Investigación  
de la Facultad de Medicina Humana de la  
Universidad de San Martín de Porres

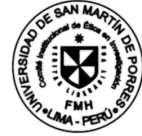

Supplement: Supplementary file 5 [file USMP Ethics approved protocol.pdf › Additional File 4_ IRB-Ethics Committee/USMP Ethics approved protocol.pdf]
