# Supplementary material for: Search AI: a Machine Learning algorithm for chronic kidney disease risk detection using eight readily available clinical features
Source: Research Square preprint supplement (doi:10.21203/rs.3.rs-7888843/v1), 2025-11-13
Supplement: Supplementary file 1 [file Carta comité ética USMP.pdf › Additional File 4_ IRB-Ethics Committee/Carta comité ética USMP.pdf]

Medellín, Abril 5 de 2025

Doctor  
AMADOR VARGAS GUERRA  
Presidente Comité Institucional de Ética en Investigación  
Facultad de Medicina Humana  
Universidad San Martín de Porres

Estimado Dr. Mendoza y miembros del Comité de Ética,

Por medio de la presente, solicitamos su amable revisión del protocolo de investigación titulado: **"Detección del riesgo de padecer enfermedad renal crónica (ERC) en pacientes asintomáticos utilizando modelos predictivos de Inteligencia Artificial (AI) a partir de datos clínicos de rutina"** para su evaluación y posible aprobación.

A continuación le brindamos un enfoque general de la investigación, explicando brevemente cada aspecto del proyecto:

Tipo de Estudio: El estudio es de tipo observacional, transversal y retrospectivo, utilizando datos secundarios de bases de datos clínicos anonimizados.

Objetivos del estudio:

- Generales: Desarrollar un modelo predictivo basado en inteligencia artificial (AI) para identificar pacientes en riesgo de enfermedad renal crónica (ERC) utilizando datos clínicos de rutina.
- Específicos:
  1. Caracterizar las variables clínicas y demográficas de los pacientes incluidos.
  2. Entrenar un modelo predictivo de AI con 7 variables clínicas.
  3. Evaluar el desempeño del modelo predictivo utilizando datos desconocidos para el modelo de AI.

Justificación: La ERC, con una prevalencia global del 10% y una tendencia creciente, representa un problema crítico para los sistemas de salud debido a su progresión silenciosa y los altos costos asociados. Este estudio propone una solución tecnológica accesible y equitativa para la detección temprana, basada en variables rutinarias, beneficiando a los sistemas de salud y la población de Colombia y Perú, con proyección a nivel global.

Descripción operacional (ver anexo 1): El modelo se entrenará utilizando registros clínicos anonimizados provenientes de tres instituciones de salud: Somedyt y Medisinú en Colombia, y PulsoSalud en Perú. Las variables incluidas son:

1. Duración de la diabetes.
2. Diagnóstico de diabetes (sí/no).
3. Presión arterial sistólica.
4. Presión arterial diastólica.

5. Diagnóstico de hipertensión (sí/no).
6. Índice de masa corporal.
7. Sexo.

La tasa de filtración glomerular estimada (TFGe) es el desenlace principal, y será calculada de forma estandarizada y sistemática usando la ecuación CKD EPI, en su última versión del año 2021. En la investigación se definió un valor inferior a 60 ml/min/1,73 m<sup>2</sup> como indicativo de riesgo/diagnóstico de ERC, lo que dentro del flujo de trabajo clínico de dichas instituciones se traduce como la necesidad de pruebas adicionales, como una segunda muestra de creatinina sérica.

Lugar y tiempo de duración: La investigación utilizará datos recolectados entre 2019 y 2024 por las instituciones mencionadas. El análisis de la información y el entrenamiento del modelo inicio en el año 2024 y tenemos proyectado finalizar la investigación en el segundo semestre de 2025, dependiendo del resultado de la evaluación del comité.

Número de registros y recolección de datos: El estudio analizará un total de 645,412 registros iniciales, de los cuales se seleccionaron 203,067 registros elegibles tras aplicar los criterios de inclusión y exclusión. Los datos han sido anonimizados previamente por las instituciones de salud que los suministraron, cumpliendo con estándares internacionales de seguridad (ISO 27001) y con los principios éticos de autonomía, beneficencia, justicia y no maleficencia.

Agradecemos de antemano su atención y consideración del proyecto para su aprobación o sugerencias de mejora. Quedamos atentos a sus observaciones. Nuestro equipo investigador tiene como prioridad el poder garantizar el cumplimiento de los estándares éticos y científicos necesarios para la difusión científica de la investigación.

Atentamente,

*Ana María Llerena*

Ana María Llerena  
Investigadora principal  
Asesora General  
Pulso Salud

*Natalia Castaño Villegas*  
Natalia Castaño Villegas (09-Apr-2025 09:53 CDT)

Natalia Castaño Villegas  
Médica Epidemióloga  
Líder de Evidencia Médica en Proyectos  
con IA  
Arkangel AI

Anexo 1. Matriz Operacional

| OBJETIVO                                      | ACTIVIDAD                                                       | RESPONSABLE                                                | RECURSOS NECESARIOS                                           | INDICADOR DE CUMPLIMIENTO                          | TIEMPO ESTIMADO                 |
|-----------------------------------------------|-----------------------------------------------------------------|------------------------------------------------------------|---------------------------------------------------------------|----------------------------------------------------|---------------------------------|
| DESARROLLAR EL MODELO PREDICTIVO BASADO EN AI | - Recepción y validación de bases de datos anonimizadas.        | Equipo de Machine Learning (Arkangel AI)                   | Infraestructura tecnológica (servidores, AWS).                | Base de datos validada y unificada.                | 1 mes (enero 2025)              |
|                                               | - Entrenamiento del modelo utilizando algoritmos de AI.         | Ingenieros de Machine Learning                             | Algoritmos de AI, SHAP, herramientas de análisis estadístico. | Modelos entrenados y categorizados según métricas. | 2 meses (febrero-marzo 2025)    |
| EVALUAR EL DESEMPEÑO DEL MODELO               | - Testeo del modelo con datos no incluidos en el entrenamiento. | Equipo de investigación clínica                            | Software de análisis (Python).                                | Informe de resultados de testeo.                   | 0,5 meses (marzo 2025)          |
| ANALIZAR LOS RESULTADOS OBTENIDOS             | - Comparación de predicciones del modelo con valores clínicos.  | Equipo multidisciplinario (nefrología, ML, epidemiología). | Herramientas estadísticas y de visualización de datos.        | Matrices de confusión, curvas ROC generadas.       | Primer trimestre 2024           |
| DIFUNDIR LOS RESULTADOS                       | - Escritura y sometimiento a revista indexada.                  | Investigadores principales                                 | Recursos editoriales y bibliográficos.                        | Publicación del estudio.                           | Segundo trimestre semestre 2025 |

Anexo 2. Lista de documentos anexos

1. Protocolo de Investigacion
2. Hojas de vida equipo investigador
3. Formato CEI
4. Constancia de buenas prácticas clínicas de investigador principal
