# Supplementary material for: Search AI: a Machine Learning algorithm for chronic kidney disease risk detection using eight readily available clinical features
Source: Research Square preprint supplement (doi:10.21203/rs.3.rs-7888843/v1), 2025-11-13
Supplement: Supplementary file 2 [file 557abf913590609d5b947eb1.xlsx]

## Sheet: Model preselection Sensitivity 
project_name	type_of_data	model_name	model_architecture	accuracy	areaUnderCurve	averagePrecision	cohensK	f1Score	precision	recall	specificity
NdbSmoteEqual1Erc	Partition data - ndb	DecisionTreeC_max_depth-26_min_samples_split-12_RandomSearch	DecisionTreeC	0.914114	0.950654	0.907897	0.821345	0.893122	0.884991	0.901403	0.922521
NdbSmoteEqual1Erc	Partition data - ndb	DeepFullyConnectedNeuralNetwork_Adagrad_l1_dropoutTrue_numHiddenLayers1	DeepFullyConnectedNeuralNetwork	0.867068	0.94196	0.897443	0.731217	0.847461	0.780095	0.927561	0.827057
DbSmoteEqual1Erc	Partition data - db	RFC_n_estimators-388_max_depth-35_RandomSearch	RFC	0.895257	0.93784	0.978585	0.6653	0.935096	0.906056	0.96606	0.642685
NdbSmoteEqual1Erc	Partition data - ndb	DeepFullyConnectedNeuralNetwork_Adagrad_l1_dropoutFalse_numHiddenLayers12	DeepFullyConnectedNeuralNetwork	0.854771	0.929969	0.864026	0.708506	0.836709	0.757359	0.934631	0.80195
NdbSmoteEqual1Erc	Partition data - ndb	DeepFullyConnectedNeuralNetwork_Adagrad_l1_dropoutFalse_numHiddenLayers5	DeepFullyConnectedNeuralNetwork	0.855702	0.929352	0.867118	0.708321	0.834554	0.767685	0.914183	0.817021
NdbSmoteEqual1Erc	Partition data - ndb	DeepFullyConnectedNeuralNetwork_RMSprop_l1_dropoutTrue_numHiddenLayers5	DeepFullyConnectedNeuralNetwork	0.852865	0.926795	0.854623	0.705953	0.836509	0.750043	0.945508	0.79159
DbSmoteEqual1Erc	Partition data - db	RFC_n_estimators-500_max_depth-20_GridSearch	RFC	0.885852	0.926147	0.975287	0.617479	0.930384	0.888349	0.976595	0.562148
AllDataAugmentedDownsampledErc	All data	DeepFullyConnectedNeuralNetwork_Adagrad_l1_dropoutTrue_numHiddenLayers1	DeepFullyConnectedNeuralNetwork	0.8558	0.923019	0.903046	0.711477	0.864371	0.818407	0.915805	0.795377
AllDataAugmentedDownsampledErc	All data	DeepFullyConnectedNeuralNetwork_SGD_l1_dropoutTrue_numHiddenLayers1	DeepFullyConnectedNeuralNetwork	0.850041	0.920347	0.89982	0.699963	0.858398	0.815627	0.905903	0.793789
AllDataAugmentedDownsampledErc	All data	DeepFullyConnectedNeuralNetwork_Adagrad_l1_dropoutTrue_numHiddenLayers5	DeepFullyConnectedNeuralNetwork	0.846813	0.918341	0.895571	0.693399	0.861824	0.787163	0.952132	0.74076
AllDataAugmentedDownsampledErc	All data	DecisionTreeC_max_depth-4_min_samples_split-2_GridSearch	DecisionTreeC	0.852256	0.917755	0.884339	0.704397	0.860306	0.81841	0.906723	0.797409
AllDataSmoteEqual1Erc	All data	DeepFullyConnectedNeuralNetwork_Adagrad_l1_dropoutFalse_numHiddenLayers1	DeepFullyConnectedNeuralNetwork	0.848014	0.917523	0.89183	0.696151	0.858356	0.801752	0.92356	0.772879
NdbSmoteEqual1Erc	Partition data - ndb	DeepFullyConnectedNeuralNetwork_SGD_l1_dropoutFalse_numHiddenLayers5	DeepFullyConnectedNeuralNetwork	0.839161	0.916424	0.837568	0.681666	0.825909	0.725633	0.958342	0.760332
AllDataAugmentedDownsampledErc	All data	DeepFullyConnectedNeuralNetwork_Adagrad_l1_dropoutFalse_numHiddenLayers1	DeepFullyConnectedNeuralNetwork	0.84463	0.914482	0.892006	0.689078	0.856918	0.796479	0.927283	0.7614
AllDataSmoteEqual1Erc	All data	DeepFullyConnectedNeuralNetwork_RMSprop_l1_dropoutFalse_numHiddenLayers5	DeepFullyConnectedNeuralNetwork	0.845624	0.912788	0.882741	0.691351	0.854262	0.807022	0.907377	0.784209
AllDataSmoteEqual1Erc	All data	DecisionTreeC_max_depth-33_min_samples_split-2_RandomSearch	DecisionTreeC	0.907283	0.909326	0.869445	0.814571	0.90765	0.901625	0.913755	0.900846
AllDataAugmentedDownsampledErc	All data	DeepFullyConnectedNeuralNetwork_RMSprop_l1_dropoutFalse_numHiddenLayers1	DeepFullyConnectedNeuralNetwork	0.84232	0.908413	0.879089	0.684476	0.853549	0.799218	0.915805	0.768322
AllDataSmoteEqual1Erc	All data	DeepFullyConnectedNeuralNetwork_SGD_l1_dropoutTrue_numHiddenLayers1	DeepFullyConnectedNeuralNetwork	0.838932	0.906559	0.875326	0.677986	0.849212	0.796344	0.909599	0.768651
AllDataSmoteEqual1Erc	All data	DeepFullyConnectedNeuralNetwork_Adagrad_l1_dropoutFalse_numHiddenLayers5	DeepFullyConnectedNeuralNetwork	0.837682	0.905992	0.870734	0.675541	0.852208	0.780422	0.938537	0.737377
AllDataAugmentedDownsampledErc	All data	DeepFullyConnectedNeuralNetwork_SGD_l1_dropoutFalse_numHiddenLayers1	DeepFullyConnectedNeuralNetwork	0.841909	0.905899	0.87942	0.683664	0.852451	0.8016	0.910192	0.773149
AllDataSmoteEqual1Erc	All data	DeepFullyConnectedNeuralNetwork_Adagrad_l1_dropoutFalse_numHiddenLayers12	DeepFullyConnectedNeuralNetwork	0.832967	0.904333	0.87286	0.666127	0.84873	0.773789	0.939743	0.726774
AllDataSmoteEqual1Erc	All data	DeepFullyConnectedNeuralNetwork_RMSprop_l1_dropoutFalse_numHiddenLayers1	DeepFullyConnectedNeuralNetwork	0.84515	0.902933	0.866182	0.690423	0.855455	0.80016	0.918959	0.771743
AllDataAugmentedDownsampledErc	All data	DeepFullyConnectedNeuralNetwork_Adagrad_l1_dropoutFalse_numHiddenLayers5	DeepFullyConnectedNeuralNetwork	0.836877	0.901399	0.872129	0.67358	0.848787	0.793419	0.912462	0.760765
AllDataSmoteEqual1Erc	All data	DeepFullyConnectedNeuralNetwork_RMSprop_l1_dropoutTrue_numHiddenLayers1	DeepFullyConnectedNeuralNetwork	0.837761	0.898395	0.861482	0.675634	0.847238	0.798534	0.902269	0.773605
AllDataAugmentedDownsampledErc	All data	DeepFullyConnectedNeuralNetwork_RMSprop_l1_dropoutFalse_numHiddenLayers5	DeepFullyConnectedNeuralNetwork	0.835548	0.898356	0.860952	0.670851	0.851705	0.777737	0.941221	0.729138
NdbSmoteEqual1Erc	Partition data - ndb	DeepFullyConnectedNeuralNetwork_Adagrad_l1_dropoutTrue_numHiddenLayers12	DeepFullyConnectedNeuralNetwork	0.840893	0.89091	0.759749	0.685264	0.828033	0.726701	0.962204	0.760656
AllDataAugmentedDownsampledErc	All data	DeepFullyConnectedNeuralNetwork_SGD_l1_dropoutFalse_numHiddenLayers5	DeepFullyConnectedNeuralNetwork	0.836529	0.887804	0.848036	0.672816	0.852493	0.778879	0.941473	0.730852
AllDataSmoteEqual1Erc	All data	DeepFullyConnectedNeuralNetwork_SGD_l1_dropoutTrue_numHiddenLayers5	DeepFullyConnectedNeuralNetwork	0.820246	0.884187	0.842516	0.640679	0.835631	0.767977	0.916357	0.724659
DbSmoteEqual1Erc	Partition data - db	DecisionTreeC_max_depth-38_min_samples_split-13_RandomSearch	DecisionTreeC	0.867454	0.882897	0.947029	0.615768	0.914864	0.917948	0.9118	0.709262
AllDataSmoteEqual0Point5Erc	All data	DeepFullyConnectedNeuralNetwork_Adagrad_l1_dropoutTrue_numHiddenLayers12	DeepFullyConnectedNeuralNetwork	0.803557	0.879648	0.685622	0.605751	0.762933	0.63884	0.946856	0.731744
AllDataAugmentedDownsampledErc	All data	DeepFullyConnectedNeuralNetwork_SGD_l1_dropoutFalse_numHiddenLayers12	DeepFullyConnectedNeuralNetwork	0.579204	0.878884	0.845561	0.155935	0.704187	0.543955	0.998234	0.157246
AllDataSmoteEqual1Erc	All data	DeepFullyConnectedNeuralNetwork_Adagrad_l1_dropoutTrue_numHiddenLayers12	DeepFullyConnectedNeuralNetwork	0.83091	0.869874	0.797273	0.662084	0.851892	0.756237	0.97525	0.687358
DbSmoteEqual1Erc	Partition data - db	DecisionTreeC_max_depth-32_min_samples_split-2_RandomSearch	DecisionTreeC	0.869453	0.860402	0.932989	0.61768	0.916482	0.915896	0.917068	0.699597
AllDataSmoteEqual1Erc	All data	DecisionTreeC_max_depth-1_min_samples_split-2_GridSearch	DecisionTreeC	0.844817	0.845042	0.773903	0.689772	0.856251	0.795615	0.926892	0.763191
COLAugmentedpositivesx2	All data	DeepFullyConnectedNeuralNetwork_Adagrad_l1_dropoutFalse_numHiddenLayers5	DeepFullyConnectedNeuralNetwork	0.672167	0.827699	0.912513	0.000903628	0.803891	0.672112	0.99995	0.000722991
DbSmoteEqual1Erc	Partition data - db	KNC_metric-euclidean_n_neighbors-3_p-7219.987722668247_RandomSearch	KNC	0.863928	0.82273	0.91191	0.540396	0.917224	0.873765	0.965232	0.50255
DbSmoteEqual1Erc	Partition data - db	KNC_metric-euclidean_n_neighbors-3_p-7219.987722668247_RandomSearch	KNC	0.863928	0.82273	0.91191	0.540396	0.917224	0.873765	0.965232	0.50255
DbSmoteEqual1Erc	Partition data - db	KNC_metric-cityblock_n_neighbors-2_p-1_GridSearch	KNC	0.858814	0.816409	0.908057	0.593485	0.90907	0.91461	0.903597	0.69906
DbSmoteEqual1Erc	Partition data - db	KNC_metric-cityblock_n_neighbors-2_p-1_GridSearch	KNC	0.858814	0.816409	0.908057	0.593485	0.90907	0.91461	0.903597	0.69906
COLAugmentedpositivesx2	All data	DeepFullyConnectedNeuralNetwork_RMSprop_l1_dropoutTrue_numHiddenLayers5	DeepFullyConnectedNeuralNetwork	0.671963	0.812214	0.905034	0	0.803802	0.671963	1	0
COLAugmentedpositivesx2	All data	DeepFullyConnectedNeuralNetwork_SGD_l1_dropoutFalse_numHiddenLayers1	DeepFullyConnectedNeuralNetwork	0.691614	0.806466	0.899851	0.0935841	0.811561	0.688468	0.988252	0.0839703
COLAugmentedpositivesx2	All data	DeepFullyConnectedNeuralNetwork_RMSprop_l1_dropoutFalse_numHiddenLayers12	DeepFullyConnectedNeuralNetwork	0.671963	0.80268	0.888616	0	0.803802	0.671963	1	0
DbSmoteEqual1Erc	Partition data - db	DecisionTreeC_max_depth-5_min_samples_split-2_GridSearch	DecisionTreeC	0.81473	0.797324	0.919255	0.316814	0.890251	0.828409	0.962071	0.289128
DbSmoteEqual1Erc	Partition data - db	DecisionTreeC_max_depth-5_min_samples_split-2_GridSearch	DecisionTreeC	0.81473	0.797324	0.919255	0.316814	0.890251	0.828409	0.962071	0.289128
COLAugmentedpositivesx2	All data	DeepFullyConnectedNeuralNetwork_RMSprop_l1_dropoutFalse_numHiddenLayers5	DeepFullyConnectedNeuralNetwork	0.674504	0.79264	0.887715	0.0118532	0.804859	0.673923	0.998941	0.00991531
COLAugmentedpositivesx2	All data	DeepFullyConnectedNeuralNetwork_Adagrad_l1_dropoutFalse_numHiddenLayers12	DeepFullyConnectedNeuralNetwork	0.671963	0.788711	0.887006	0	0.803802	0.671963	1	0
AllDataSmoteEqual1Erc	All data	DeepFullyConnectedNeuralNetwork_SGD_l1_dropoutTrue_numHiddenLayers12	DeepFullyConnectedNeuralNetwork	0.498631	0.784564	0.739055	0	0.665449	0.498631	1	0
COLAugmentedpositivesx2	All data	DeepFullyConnectedNeuralNetwork_RMSprop_l1_dropoutTrue_numHiddenLayers12	DeepFullyConnectedNeuralNetwork	0.671963	0.775065	0.864054	0	0.803802	0.671963	1	0
DbSmoteEqual1Erc	Partition data - db	DeepFullyConnectedNeuralNetwork_Adagrad_l1_dropoutTrue_numHiddenLayers1	DeepFullyConnectedNeuralNetwork	0.805502	0.77476	0.915618	0.323112	0.882788	0.833902	0.937763	0.333691
DbSmoteEqual1Erc	Partition data - db	DeepFullyConnectedNeuralNetwork_Adagrad_l1_dropoutFalse_numHiddenLayers3	DeepFullyConnectedNeuralNetwork	0.803092	0.774103	0.914942	0.338384	0.880014	0.839598	0.924518	0.369933
DbSmoteEqual1Erc	Partition data - db	DeepFullyConnectedNeuralNetwork_SGD_l1_dropoutTrue_numHiddenLayers1	DeepFullyConnectedNeuralNetwork	0.80797	0.773421	0.914742	0.2779	0.886873	0.821371	0.963727	0.252349
DbSmoteEqual1Erc	Partition data - db	DeepFullyConnectedNeuralNetwork_Adagrad_l1_dropoutTrue_numHiddenLayers1	DeepFullyConnectedNeuralNetwork	0.802151	0.772496	0.914609	0.330317	0.879726	0.837529	0.9264	0.358926
DbSmoteEqual1Erc	Partition data - db	DeepFullyConnectedNeuralNetwork_SGD_l1_dropoutFalse_numHiddenLayers3	DeepFullyConnectedNeuralNetwork	0.804561	0.77242	0.914624	0.332126	0.88155	0.836975	0.931141	0.35302
DbSmoteEqual1Erc	Partition data - db	DeepFullyConnectedNeuralNetwork_Adagrad_l1_dropoutFalse_numHiddenLayers5	DeepFullyConnectedNeuralNetwork	0.799447	0.772281	0.914696	0.341062	0.876894	0.842251	0.914509	0.388993
DbSmoteEqual1Erc	Partition data - db	LogRegression_penalty-l2_C-0.1_solver-liblinear_GridSearch	LogRegression	0.807147	0.771944	0.913881	0.285109	0.88593	0.823328	0.958835	0.26604
DbSmoteEqual1Erc	Partition data - db	LogRegression_penalty-l2_C-0.05061583846218687_solver-lbfgs_RandomSearch	LogRegression	0.807147	0.771937	0.913879	0.284583	0.885954	0.823203	0.959061	0.265235
DbSmoteEqual1Erc	Partition data - db	DeepFullyConnectedNeuralNetwork_SGD_l1_dropoutFalse_numHiddenLayers1	DeepFullyConnectedNeuralNetwork	0.80221	0.77193	0.913718	0.32164	0.880262	0.834897	0.93084	0.343356
ColDataAugmentedDownsampledErc	All data	DeepFullyConnectedNeuralNetwork_SGD_l1_dropoutFalse_numHiddenLayers1	DeepFullyConnectedNeuralNetwork	0.497666	0.770167	0.74545	0.000200955	0.664544	0.497615	1	0.000201939
ColDataAugmentedDownsampledErc	All data	DeepFullyConnectedNeuralNetwork_Adagrad_l1_dropoutFalse_numHiddenLayers12	DeepFullyConnectedNeuralNetwork	0.497565	0.769944	0.749242	0	0.664499	0.497565	1	0
DbSmoteEqual1Erc	Partition data - db	DeepFullyConnectedNeuralNetwork_SGD_l1_dropoutTrue_numHiddenLayers3	DeepFullyConnectedNeuralNetwork	0.806971	0.767565	0.911959	0.260827	0.886852	0.81787	0.968543	0.230604
DbSmoteEqual1Erc	Partition data - db	DeepFullyConnectedNeuralNetwork_SGD_l1_dropoutTrue_numHiddenLayers1	DeepFullyConnectedNeuralNetwork	0.808147	0.765901	0.910695	0.290291	0.886454	0.824233	0.958835	0.270604
DbSmoteEqual0Point5Erc	Partition data - db	DeepFullyConnectedNeuralNetwork_SGD_l1_dropoutFalse_numHiddenLayers1	DeepFullyConnectedNeuralNetwork	0.714723	0.765533	0.840986	0.291486	0.808325	0.708718	0.940508	0.314058
DbSmoteEqual1Erc	Partition data - db	DeepFullyConnectedNeuralNetwork_Adagrad_l1_dropoutTrue_numHiddenLayers5	DeepFullyConnectedNeuralNetwork	0.78105	0.765522	0.911426	0	0.877067	0.78105	1	0
DbSmoteEqual1Erc	Partition data - db	DeepFullyConnectedNeuralNetwork_SGD_l1_dropoutTrue_numHiddenLayers8	DeepFullyConnectedNeuralNetwork	0.78105	0.764372	0.911604	0	0.877067	0.78105	1	0
DbSmoteEqual1Erc	Partition data - db	DeepFullyConnectedNeuralNetwork_Adagrad_l1_dropoutTrue_numHiddenLayers12	DeepFullyConnectedNeuralNetwork	0.78105	0.764151	0.911632	0	0.877067	0.78105	1	0
DbSmoteEqual1Erc	Partition data - db	DeepFullyConnectedNeuralNetwork_RMSprop_l1_dropoutFalse_numHiddenLayers8	DeepFullyConnectedNeuralNetwork	0.805972	0.763433	0.910293	0.255021	0.886349	0.816907	0.968694	0.225503
DbSmoteEqual1Erc	Partition data - db	DeepFullyConnectedNeuralNetwork_SGD_l1_dropoutTrue_numHiddenLayers5	DeepFullyConnectedNeuralNetwork	0.78105	0.762853	0.910957	0	0.877067	0.78105	1	0
DbSmoteEqual1Erc	Partition data - db	DeepFullyConnectedNeuralNetwork_Adagrad_l1_dropoutFalse_numHiddenLayers1	DeepFullyConnectedNeuralNetwork	0.802445	0.762768	0.910269	0.182805	0.886495	0.80408	0.987733	0.141477
DbSmoteEqual1Erc	Partition data - db	DeepFullyConnectedNeuralNetwork_Adagrad_l1_dropoutFalse_numHiddenLayers1	DeepFullyConnectedNeuralNetwork	0.805678	0.762312	0.910506	0.248074	0.886415	0.815527	0.970801	0.216644
DbSmoteEqual1Erc	Partition data - db	DeepFullyConnectedNeuralNetwork_RMSprop_l1_dropoutFalse_numHiddenLayers14	DeepFullyConnectedNeuralNetwork	0.78105	0.758294	0.907281	0	0.877067	0.78105	1	0
DbSmoteEqual1Erc	Partition data - db	DeepFullyConnectedNeuralNetwork_Adagrad_l1_dropoutTrue_numHiddenLayers8	DeepFullyConnectedNeuralNetwork	0.78105	0.758187	0.908549	0	0.877067	0.78105	1	0
DbSmoteEqual1Erc	Partition data - db	DeepFullyConnectedNeuralNetwork_Adagrad_l1_dropoutTrue_numHiddenLayers12	DeepFullyConnectedNeuralNetwork	0.78105	0.758026	0.908843	0	0.877067	0.78105	1	0
DbSmoteEqual1Erc	Partition data - db	DeepFullyConnectedNeuralNetwork_SGD_l1_dropoutTrue_numHiddenLayers12	DeepFullyConnectedNeuralNetwork	0.78105	0.75703	0.908605	0	0.877067	0.78105	1	0
DbSmoteEqual1Erc	Partition data - db	DeepFullyConnectedNeuralNetwork_RMSprop_l1_dropoutTrue_numHiddenLayers5	DeepFullyConnectedNeuralNetwork	0.78105	0.755014	0.908302	0	0.877067	0.78105	1	0
DbSmoteEqual1Erc	Partition data - db	DeepFullyConnectedNeuralNetwork_RMSprop_l1_dropoutTrue_numHiddenLayers14	DeepFullyConnectedNeuralNetwork	0.78105	0.754853	0.907476	0	0.877067	0.78105	1	0
DbSmoteEqual1Erc	Partition data - db	DeepFullyConnectedNeuralNetwork_RMSprop_l1_dropoutFalse_numHiddenLayers3	DeepFullyConnectedNeuralNetwork	0.781931	0.754398	0.905569	0.00627613	0.877501	0.781739	1	0.00402685
DbSmoteEqual0Point5Erc	Partition data - db	DeepFullyConnectedNeuralNetwork_Adagrad_l1_dropoutFalse_numHiddenLayers12	DeepFullyConnectedNeuralNetwork	0.681262	0.753765	0.832481	0.155185	0.79816	0.670737	0.985351	0.141645
COLAugmentedpositivesx2	All data	DeepFullyConnectedNeuralNetwork_SGD_l1_dropoutTrue_numHiddenLayers5	DeepFullyConnectedNeuralNetwork	0.671963	0.752844	0.868082	0	0.803802	0.671963	1	0
DbSmoteEqual1Erc	Partition data - db	DeepFullyConnectedNeuralNetwork_RMSprop_l1_dropoutTrue_numHiddenLayers8	DeepFullyConnectedNeuralNetwork	0.78105	0.752438	0.906571	0	0.877067	0.78105	1	0
COLAugmentedpositivesx2	All data	DeepFullyConnectedNeuralNetwork_SGD_l1_dropoutFalse_numHiddenLayers5	DeepFullyConnectedNeuralNetwork	0.671963	0.752297	0.874932	0	0.803802	0.671963	1	0
DbSmoteEqual1Erc	Partition data - db	DeepFullyConnectedNeuralNetwork_RMSprop_l1_dropoutFalse_numHiddenLayers5	DeepFullyConnectedNeuralNetwork	0.78105	0.752144	0.904307	0	0.877067	0.78105	1	0
DbSmoteEqual1Erc	Partition data - db	DeepFullyConnectedNeuralNetwork_Adagrad_l1_dropoutFalse_numHiddenLayers12	DeepFullyConnectedNeuralNetwork	0.78105	0.751143	0.904071	0	0.877067	0.78105	1	0
DbSmoteEqual1Erc	Partition data - db	DeepFullyConnectedNeuralNetwork_RMSprop_l1_dropoutTrue_numHiddenLayers12	DeepFullyConnectedNeuralNetwork	0.78105	0.750254	0.903553	0	0.877067	0.78105	1	0
DbSmoteEqual1Erc	Partition data - db	DeepFullyConnectedNeuralNetwork_RMSprop_l1_dropoutFalse_numHiddenLayers1	DeepFullyConnectedNeuralNetwork	0.78105	0.745284	0.901675	0	0.877067	0.78105	1	0
DbSmoteEqual1Erc	Partition data - db	DeepFullyConnectedNeuralNetwork_Adagrad_l1_dropoutTrue_numHiddenLayers14	DeepFullyConnectedNeuralNetwork	0.78105	0.744468	0.901772	0	0.877067	0.78105	1	0
DbSmoteEqual1Erc	Partition data - db	DeepFullyConnectedNeuralNetwork_SGD_l1_dropoutFalse_numHiddenLayers14	DeepFullyConnectedNeuralNetwork	0.78105	0.744386	0.901044	0	0.877067	0.78105	1	0
DbSmoteEqual1Erc	Partition data - db	DeepFullyConnectedNeuralNetwork_Adagrad_l1_dropoutFalse_numHiddenLayers5	DeepFullyConnectedNeuralNetwork	0.78105	0.744063	0.901755	0	0.877067	0.78105	1	0
DbSmoteEqual1Erc	Partition data - db	DeepFullyConnectedNeuralNetwork_SGD_l1_dropoutTrue_numHiddenLayers14	DeepFullyConnectedNeuralNetwork	0.78105	0.738518	0.900026	0	0.877067	0.78105	1	0
COLAugmentedpositivesx2	All data	DeepFullyConnectedNeuralNetwork_SGD_l1_dropoutFalse_numHiddenLayers12	DeepFullyConnectedNeuralNetwork	0.671963	0.732531	0.845156	0	0.803802	0.671963	1	0
DbSmoteEqual1Erc	Partition data - db	DeepFullyConnectedNeuralNetwork_SGD_l1_dropoutFalse_numHiddenLayers1	DeepFullyConnectedNeuralNetwork	0.78152	0.73112	0.900174	0.0033508	0.877298	0.781417	1	0.00214765
DbSmoteEqual1Erc	Partition data - db	DeepFullyConnectedNeuralNetwork_SGD_l1_dropoutFalse_numHiddenLayers5	DeepFullyConnectedNeuralNetwork	0.78105	0.73041	0.896921	0	0.877067	0.78105	1	0
DbSmoteEqual1Erc	Partition data - db	DeepFullyConnectedNeuralNetwork_RMSprop_l1_dropoutFalse_numHiddenLayers1	DeepFullyConnectedNeuralNetwork	0.781226	0.725184	0.890435	0.0012575	0.877154	0.781188	1	0.000805369
DbSmoteEqual1Erc	Partition data - db	DeepFullyConnectedNeuralNetwork_RMSprop_l1_dropoutTrue_numHiddenLayers1	DeepFullyConnectedNeuralNetwork	0.783342	0.725141	0.89235	0.0253247	0.877947	0.783881	0.997667	0.0187919
ColDataAugmentedDownsampledErc	All data	DeepFullyConnectedNeuralNetwork_RMSprop_l1_dropoutFalse_numHiddenLayers12	DeepFullyConnectedNeuralNetwork	0.616985	0.714801	0.68439	0.236177	0.704084	0.571883	0.915783	0.321082
DbSmoteEqual1Erc	Partition data - db	DeepFullyConnectedNeuralNetwork_Adagrad_l1_dropoutTrue_numHiddenLayers3	DeepFullyConnectedNeuralNetwork	0.78105	0.713428	0.891474	0	0.877067	0.78105	1	0
DbSmoteEqual1Erc	Partition data - db	DeepFullyConnectedNeuralNetwork_Adagrad_l1_dropoutFalse_numHiddenLayers8	DeepFullyConnectedNeuralNetwork	0.78105	0.710804	0.882388	0	0.877067	0.78105	1	0
DbSmoteEqual1Erc	Partition data - db	DeepFullyConnectedNeuralNetwork_RMSprop_l1_dropoutTrue_numHiddenLayers1	DeepFullyConnectedNeuralNetwork	0.78105	0.70769	0.884166	0	0.877067	0.78105	1	0
DbSmoteEqual1Erc	Partition data - db	DeepFullyConnectedNeuralNetwork_RMSprop_l1_dropoutTrue_numHiddenLayers5	DeepFullyConnectedNeuralNetwork	0.78105	0.705074	0.882047	0	0.877067	0.78105	1	0
DbSmoteEqual1Erc	Partition data - db	DeepFullyConnectedNeuralNetwork_Adagrad_l1_dropoutFalse_numHiddenLayers12	DeepFullyConnectedNeuralNetwork	0.78105	0.704711	0.880594	0	0.877067	0.78105	1	0
COLAugmentedpositivesx2	All data	DeepFullyConnectedNeuralNetwork_SGD_l1_dropoutTrue_numHiddenLayers12	DeepFullyConnectedNeuralNetwork	0.671963	0.698871	0.797558	0	0.803802	0.671963	1	0
DbSmoteEqual1Erc	Partition data - db	DeepFullyConnectedNeuralNetwork_SGD_l1_dropoutFalse_numHiddenLayers5	DeepFullyConnectedNeuralNetwork	0.78105	0.687694	0.87491	0	0.877067	0.78105	1	0
DbSmoteEqual0Point5Erc	Partition data - db	DeepFullyConnectedNeuralNetwork_SGD_l1_dropoutTrue_numHiddenLayers5	DeepFullyConnectedNeuralNetwork	0.68413	0.681572	0.760726	0.208687	0.789527	0.687944	0.926308	0.254377
DbSmoteEqual1Erc	Partition data - db	DeepFullyConnectedNeuralNetwork_SGD_l1_dropoutFalse_numHiddenLayers12	DeepFullyConnectedNeuralNetwork	0.78105	0.679671	0.867258	0	0.877067	0.78105	1	0
DbSmoteEqual1Erc	Partition data - db	DeepFullyConnectedNeuralNetwork_Adagrad_l1_dropoutFalse_numHiddenLayers14	DeepFullyConnectedNeuralNetwork	0.771116	0.678874	0.871971	0.0463029	0.86873	0.786822	0.969672	0.0628188
DbSmoteEqual1Erc	Partition data - db	DeepFullyConnectedNeuralNetwork_RMSprop_l1_dropoutTrue_numHiddenLayers3	DeepFullyConnectedNeuralNetwork	0.78105	0.670548	0.871499	0	0.877067	0.78105	1	0
DbSmoteEqual1Erc	Partition data - db	DeepFullyConnectedNeuralNetwork_RMSprop_l1_dropoutFalse_numHiddenLayers5	DeepFullyConnectedNeuralNetwork	0.78105	0.645745	0.85855	0	0.877067	0.78105	1	0
DbSmoteEqual0Point5Erc	Partition data - db	DeepFullyConnectedNeuralNetwork_RMSprop_l1_dropoutTrue_numHiddenLayers12	DeepFullyConnectedNeuralNetwork	0.639579	0.641187	0.756739	0	0.780175	0.639579	1	0
DbSmoteEqual1Erc	Partition data - db	DeepFullyConnectedNeuralNetwork_SGD_l1_dropoutFalse_numHiddenLayers12	DeepFullyConnectedNeuralNetwork	0.78105	0.634584	0.845741	0	0.877067	0.78105	1	0
DbSmoteEqual0Point5Erc	Partition data - db	DeepFullyConnectedNeuralNetwork_SGD_l1_dropoutFalse_numHiddenLayers12	DeepFullyConnectedNeuralNetwork	0.639579	0.631504	0.728388	0	0.780175	0.639579	1	0
DbSmoteEqual1Erc	Partition data - db	DeepFullyConnectedNeuralNetwork_RMSprop_l1_dropoutTrue_numHiddenLayers12	DeepFullyConnectedNeuralNetwork	0.78105	0.629274	0.852691	0	0.877067	0.78105	1	0
DbSmoteEqual1Erc	Partition data - db	DeepFullyConnectedNeuralNetwork_SGD_l1_dropoutFalse_numHiddenLayers8	DeepFullyConnectedNeuralNetwork	0.78105	0.628435	0.855292	0	0.877067	0.78105	1	0
ColDataAugmentedDownsampledErc	All data	DeepFullyConnectedNeuralNetwork_SGD_l1_dropoutTrue_numHiddenLayers12	DeepFullyConnectedNeuralNetwork	0.497565	0.627008	0.597204	0	0.664499	0.497565	1	0
DbSmoteEqual1Erc	Partition data - db	DeepFullyConnectedNeuralNetwork_SGD_l1_dropoutTrue_numHiddenLayers12	DeepFullyConnectedNeuralNetwork	0.78105	0.625008	0.84844	0	0.877067	0.78105	1	0
DbSmoteEqual0Point5Erc	Partition data - db	DeepFullyConnectedNeuralNetwork_Adagrad_l1_dropoutTrue_numHiddenLayers12	DeepFullyConnectedNeuralNetwork	0.639579	0.58628	0.692296	0	0.780175	0.639579	1	0
DbSmoteEqual1Erc	Partition data - db	DeepFullyConnectedNeuralNetwork_SGD_l1_dropoutTrue_numHiddenLayers5	DeepFullyConnectedNeuralNetwork	0.78105	0.568417	0.826125	0	0.877067	0.78105	1	0
ColDataAugmentedDownsampledErc	All data	DeepFullyConnectedNeuralNetwork_Adagrad_l1_dropoutTrue_numHiddenLayers12	DeepFullyConnectedNeuralNetwork	0.497565	0.536065	0.538078	0	0.664499	0.497565	1	0
DbSmoteEqual0Point5Erc	Partition data - db	DeepFullyConnectedNeuralNetwork_SGD_l1_dropoutTrue_numHiddenLayers12	DeepFullyConnectedNeuralNetwork	0.639579	0.53496	0.660617	0	0.780175	0.639579	1	0
DbSmoteEqual1Erc	Partition data - db	DeepFullyConnectedNeuralNetwork_RMSprop_l1_dropoutFalse_numHiddenLayers12	DeepFullyConnectedNeuralNetwork	0.78105	0.5	0.78105	0	0.877067	0.78105	1	0
DbSmoteEqual1Erc	Partition data - db	DeepFullyConnectedNeuralNetwork_RMSprop_l1_dropoutFalse_numHiddenLayers12	DeepFullyConnectedNeuralNetwork	0.78105	0.5	0.78105	0	0.877067	0.78105	1	0
ColDataAugmentedDownsampledErc	All data	DeepFullyConnectedNeuralNetwork_RMSprop_l1_dropoutTrue_numHiddenLayers12	DeepFullyConnectedNeuralNetwork	0.497565	0.5	0.497565	0	0.664499	0.497565	1	0

## Sheet: AUC > 90 
project_name	type_of_data	model_name	model_architecture	accuracy	areaUnderCurve	averagePrecision	cohensK	f1Score	precision	recall	specificity
DbSmoteEqual1Erc	Partition data - db	RFC_n_estimators-388_max_depth-35_RandomSearch	RFC	0.895257	0.93784	0.978585	0.6653	0.935096	0.906056	0.96606	0.642685
AllDataSmoteEqual1Erc	All data	DecisionTreeC_max_depth-33_min_samples_split-2_RandomSearch	DecisionTreeC	0.907283	0.909326	0.869445	0.814571	0.90765	0.901625	0.913755	0.900846
DbSmoteEqual1Erc	Partition data - db	RFC_n_estimators-500_max_depth-20_GridSearch	RFC	0.885852	0.926147	0.975287	0.617479	0.930384	0.888349	0.976595	0.562148
NdbSmoteEqual1Erc	Partition data - ndb	DecisionTreeC_max_depth-26_min_samples_split-12_RandomSearch	DecisionTreeC	0.914114	0.950654	0.907897	0.821345	0.893122	0.884991	0.901403	0.922521
AllDataAugmentedDownsampledErc	All data	DecisionTreeC_max_depth-4_min_samples_split-2_GridSearch	DecisionTreeC	0.852256	0.917755	0.884339	0.704397	0.860306	0.81841	0.906723	0.797409
AllDataAugmentedDownsampledErc	All data	DeepFullyConnectedNeuralNetwork_Adagrad_l1_dropoutTrue_numHiddenLayers1	DeepFullyConnectedNeuralNetwork	0.8558	0.923019	0.903046	0.711477	0.864371	0.818407	0.915805	0.795377
AllDataAugmentedDownsampledErc	All data	DeepFullyConnectedNeuralNetwork_SGD_l1_dropoutTrue_numHiddenLayers1	DeepFullyConnectedNeuralNetwork	0.850041	0.920347	0.89982	0.699963	0.858398	0.815627	0.905903	0.793789
AllDataSmoteEqual1Erc	All data	DeepFullyConnectedNeuralNetwork_RMSprop_l1_dropoutFalse_numHiddenLayers5	DeepFullyConnectedNeuralNetwork	0.845624	0.912788	0.882741	0.691351	0.854262	0.807022	0.907377	0.784209
AllDataSmoteEqual1Erc	All data	DeepFullyConnectedNeuralNetwork_Adagrad_l1_dropoutFalse_numHiddenLayers1	DeepFullyConnectedNeuralNetwork	0.848014	0.917523	0.89183	0.696151	0.858356	0.801752	0.92356	0.772879
AllDataAugmentedDownsampledErc	All data	DeepFullyConnectedNeuralNetwork_SGD_l1_dropoutFalse_numHiddenLayers1	DeepFullyConnectedNeuralNetwork	0.841909	0.905899	0.87942	0.683664	0.852451	0.8016	0.910192	0.773149
AllDataSmoteEqual1Erc	All data	DeepFullyConnectedNeuralNetwork_RMSprop_l1_dropoutFalse_numHiddenLayers1	DeepFullyConnectedNeuralNetwork	0.84515	0.902933	0.866182	0.690423	0.855455	0.80016	0.918959	0.771743
AllDataAugmentedDownsampledErc	All data	DeepFullyConnectedNeuralNetwork_RMSprop_l1_dropoutFalse_numHiddenLayers1	DeepFullyConnectedNeuralNetwork	0.84232	0.908413	0.879089	0.684476	0.853549	0.799218	0.915805	0.768322
AllDataAugmentedDownsampledErc	All data	DeepFullyConnectedNeuralNetwork_Adagrad_l1_dropoutFalse_numHiddenLayers1	DeepFullyConnectedNeuralNetwork	0.84463	0.914482	0.892006	0.689078	0.856918	0.796479	0.927283	0.7614
AllDataSmoteEqual1Erc	All data	DeepFullyConnectedNeuralNetwork_SGD_l1_dropoutTrue_numHiddenLayers1	DeepFullyConnectedNeuralNetwork	0.838932	0.906559	0.875326	0.677986	0.849212	0.796344	0.909599	0.768651
AllDataAugmentedDownsampledErc	All data	DeepFullyConnectedNeuralNetwork_Adagrad_l1_dropoutFalse_numHiddenLayers5	DeepFullyConnectedNeuralNetwork	0.836877	0.901399	0.872129	0.67358	0.848787	0.793419	0.912462	0.760765
AllDataAugmentedDownsampledErc	All data	DeepFullyConnectedNeuralNetwork_Adagrad_l1_dropoutTrue_numHiddenLayers5	DeepFullyConnectedNeuralNetwork	0.846813	0.918341	0.895571	0.693399	0.861824	0.787163	0.952132	0.74076
AllDataSmoteEqual1Erc	All data	DeepFullyConnectedNeuralNetwork_Adagrad_l1_dropoutFalse_numHiddenLayers5	DeepFullyConnectedNeuralNetwork	0.837682	0.905992	0.870734	0.675541	0.852208	0.780422	0.938537	0.737377
NdbSmoteEqual1Erc	Partition data - ndb	DeepFullyConnectedNeuralNetwork_Adagrad_l1_dropoutTrue_numHiddenLayers1	DeepFullyConnectedNeuralNetwork	0.867068	0.94196	0.897443	0.731217	0.847461	0.780095	0.927561	0.827057
AllDataSmoteEqual1Erc	All data	DeepFullyConnectedNeuralNetwork_Adagrad_l1_dropoutFalse_numHiddenLayers12	DeepFullyConnectedNeuralNetwork	0.832967	0.904333	0.87286	0.666127	0.84873	0.773789	0.939743	0.726774
NdbSmoteEqual1Erc	Partition data - ndb	DeepFullyConnectedNeuralNetwork_Adagrad_l1_dropoutFalse_numHiddenLayers5	DeepFullyConnectedNeuralNetwork	0.855702	0.929352	0.867118	0.708321	0.834554	0.767685	0.914183	0.817021
NdbSmoteEqual1Erc	Partition data - ndb	DeepFullyConnectedNeuralNetwork_Adagrad_l1_dropoutFalse_numHiddenLayers12	DeepFullyConnectedNeuralNetwork	0.854771	0.929969	0.864026	0.708506	0.836709	0.757359	0.934631	0.80195
NdbSmoteEqual1Erc	Partition data - ndb	DeepFullyConnectedNeuralNetwork_RMSprop_l1_dropoutTrue_numHiddenLayers5	DeepFullyConnectedNeuralNetwork	0.852865	0.926795	0.854623	0.705953	0.836509	0.750043	0.945508	0.79159
NdbSmoteEqual1Erc	Partition data - ndb	DeepFullyConnectedNeuralNetwork_SGD_l1_dropoutFalse_numHiddenLayers5	DeepFullyConnectedNeuralNetwork	0.839161	0.916424	0.837568	0.681666	0.825909	0.725633	0.958342	0.760332

## Sheet: Precision > 90 
project_name	type_of_data	model_name	model_architecture	accuracy	areaUnderCurve	averagePrecision	cohensK	f1Score	precision	recall	specificity
AllDataSmoteEqual1Erc	All data	DecisionTreeC_max_depth-33_min_samples_split-2_RandomSearch	DecisionTreeC	0.907283	0.909326	0.869445	0.814571	0.90765	0.901625	0.913755	0.900846
DbSmoteEqual1Erc	Partition data - db	RFC_n_estimators-388_max_depth-35_RandomSearch	RFC	0.895257	0.93784	0.978585	0.6653	0.935096	0.906056	0.96606	0.642685

## Sheet: Specificity > 85
project_name	type_of_data	model_name	model_architecture	accuracy	areaUnderCurve	averagePrecision	cohensK	f1Score	precision	recall	specificity
AllDataSmoteEqual1Erc	All data	DecisionTreeC_max_depth-33_min_samples_split-2_RandomSearch	DecisionTreeC	0.907283	0.909326	0.869445	0.814571	0.90765	0.901625	0.913755	0.900846
