# Supplementary material for: Search AI: a Machine Learning algorithm for chronic kidney disease risk detection using eight readily available clinical features
Source: Research Square preprint supplement (doi:10.21203/rs.3.rs-7888843/v1), 2025-11-13
Supplement: Supplementary file 2 [file Letter from Ethics Committee ECUSMP.pdf › Additional File 4_ IRB-Ethics Committee/Letter from Ethics Committee ECUSMP.pdf]

La Molina, 13 de mayo de 2025

**Oficio No. 408 -2025- CIEI-FMH-USMP**

Señora Doctora  
**Ana María Llerena Oviedo**  
Pulso Salud  
Presente. –

**Ref. Protocolo titulado: Detección del riesgo de padecer enfermedad renal crónica en pacientes asintomáticos utilizando modelos predictivos creados por AI a partir de datos clínicos de rutina.**

De mi consideración:

Es grato expresarle mi cordial saludo y en atención a su *carta recibida por vía electrónica el 30 de abril* informarle que, en cumplimiento de las buenas prácticas clínicas y la legislación peruana vigente en materia de investigación científica en el campo de la salud, el Comité de mi presidencia, en la **sesión del 12 de mayo de 2025 evaluó y aprobó los siguientes documentos:**

- **Protocolo titulado: Detección del riesgo de padecer enfermedad renal crónica en pacientes asintomáticos utilizando modelos predictivos creados por AI a partir de datos clínicos de rutina.**

Adjuntamos la Constancia de IRB, el CIEI, cuenta con acreditación internacional:

- **El Registro Internacional:**  
Federalwide Assurance (FWA) for the Protection of Human Subjects for International No. **00015320**
- U.S. Department of Health and Human Services (HHS) Registration of an Institutional Review Board  
(IRB) **IRB No. 00003251**

Los **Informes de Avances** se presentan cada seis meses y al año cuando solicite la reaprobación del protocolo, 30 días antes de la fecha de vencimiento.

El protocolo de la referencia sólo podrá iniciarse en Pulso Salud bajo la conducción del Investigador Principal Dra. **Ana María Llerena Oviedo**, después de obtener la aprobación del Comité Institucional de Ética en Investigación FMH-USMP y de las Instituciones involucradas.

**La aprobación del Protocolo de la referencia es por un año, vence el 12 de mayo de 2026.**

Es cuanto informo a usted para su conocimiento y fines que correspondan.

USMP  
UNIVERSIDAD DE  
SAN MARTÍN DE PORRES

**Dr. Amador Vargas Guerra**  
Presidente  
Comité Institucional de Ética en Investigación  
de la Facultad de Medicina Humana de la  
Universidad de San Martín de Porres

AVG/ABZ/ach

Comité Institucional de Ética en Investigación  
Facultad de Medicina Humana USMP  
Alameda del Corregidor N° 1531 Urb. Los Sirius  
III Etapa – La Molina  
Telf: 365-2300 anexo 160

[etica\\_fmh@usmp.pe](mailto:etica_fmh@usmp.pe)  
<https://medicina.usmp.edu.pe/comite-etica-usmp-fmh/>

## RELACIÓN DE MIEMBROS DEL COMITÉ INSTITUCIONAL DE ÉTICA EN INVESTIGACIÓN

|                     |                                   |            |                          |
|---------------------|-----------------------------------|------------|--------------------------|
| 1.                  | Dr. Amador Vargas Guerra          | presidente | Médico Rehabilitador     |
| 2.                  | Dr. Alfredo Benavides Zúñiga      | secretario | Médico Cardiólogo        |
| Miembros titulares: |                                   |            |                          |
| 3.                  | Mg. Raúl De Lama Morán            |            | Psicólogo Clínico        |
| 4.                  | Dr. José Luis Díaz Callirgos      |            | Abogado                  |
| 5.                  | Dra. Rocío Adriazola Casas        |            | Enfermera                |
| 6.                  | Dr. Percy Terán Chávez            |            | Médico Radiólogo         |
| 7.                  | Srta. Nohemí Ayala Dipaz          |            | Estudiante Universitaria |
| 8.                  | PhD Solange Rosa Paredes Moscosso |            | Investigadora biomédica  |
| Miembros alternos:  |                                   |            |                          |
|                     | Dr. Pedro Cazorla Salinas         |            | Médico Pediatra          |
|                     | Dra. Abg. Luisa Escobar Delgado   |            | Abogada                  |
|                     | Dra. Psic. Ysis Roa Meggo         |            | Psicóloga                |

### Participaron en la sesión del 12 de mayo de 2025.

Declaración de conflicto de intereses de los miembros del CIEI-FMH-USMP los siguientes miembros asistentes: **Manifestaron no tener ningún conflicto de interés para participar en la presente sesión.**

- |    |                              |            |
|----|------------------------------|------------|
| 1. | Dr. Amador Vargas Guerra     | presidente |
| 2. | Dr. Alfredo Benavides Zúñiga | secretario |
- Miembros:
3. Mg. Raúl De Lama Morán
  4. Dr. José Luis Díaz Callirgos
  5. Dra. Rocío Adriazola Casas
  6. Dr. Percy Terán Chávez
  7. Srta. Nohemí Ayala Dipaz

❖ El número necesario para el quorum es 5 miembros.

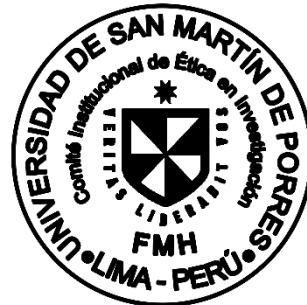

La Molina, 13 de mayo de 2025

Señora Doctora  
**Ana María Llerena Oviedo**  
Pulso Salud  
Presente. –

**Ref. Protocolo titulado: Detección del riesgo de padecer enfermedad renal crónica en pacientes asintomáticos utilizando modelos predictivos creados por AI a partir de datos clínicos de rutina.**

Por el presente dejo constancia que la (IRB/IEC) opera de conformidad con las ley y reglamentos aplicables a nivel nacional/local e internacional que regulan las operaciones de IRB/IEC.

USMP  
UNIVERSIDAD DE  
SAN MARTÍN DE PORRES

**Dr. Amador Vargas Guerra**

Presidente  
Comité Institucional de Ética en Investigación  
de la Facultad de Medicina Humana de la  
Universidad de San Martín de Porres

Comité Institucional de Ética en Investigación de la  
Facultad de Medicina Humana de la  
Universidad de San Martín de Porres  
Av. Alameda del Corregidor No. 1531  
Urb. Los Sirius - La Molina

El número de la Garantía Federal de la IRB es IRB00003251
