# Supplementary material for: Search AI: a Machine Learning algorithm for chronic kidney disease risk detection using eight readily available clinical features
Source: Research Square preprint supplement (doi:10.21203/rs.3.rs-7888843/v1), 2025-11-13
Supplement: Supplementary file 3 [file 8342d5899cf2d434f5cabefd.xlsx]

## Sheet: global_results_frecuencies
Arquitecture	Absolute Frequency	Relative Frequency						Count	Experiment/ Project Name	Number of models
DecisionTree	38	0.0896						1	AllDataAugmentedDownsampledErc	20
NN	360	0.8491						2	AllDataSmoteEqual0Point5Erc	20
KNC	21	0.0495						3	AllDataSmoteEqual1Erc	20
LogRegression	2	0.0047						4	COLAugmentedpositivesx2	20
RFC	2	0.0047						5	ColDataAugmentedDownsampledErc	22
SVC	1	0.0024						6	ColDataImputedSmoteEqual0Point5Erc	22
Total	424	1						7	ColDataSmoteEqual1Erc	22
								8	DbSmoteEqual0Point5Erc	22
								9	DbSmoteEqual1Erc	66
								10	DiabeticosImputadoMerged	23
								11	MergedColombiaImputed	22
								12	mergedColombiaImputedUpsampled	22
								13	MergedColombiaImputedUpsampledDownsampled	22
								14	MergedImputed	20
								15	MergedImputedUpsampled	20
								16	MergedImputedUpsampledDownsampled	20
								17	NdbSmoteEqual1Erc	20
								18	nodiabeticosMerged	21
									Total	424

## Sheet: global_results
project_name	type_of_data	model_name	model_architecture	accuracy	areaUnderCurve	averagePrecision	cohensK	f1Score	precision	recall	specificity
COLAugmentedpositivesx2	All data	DeepFullyConnectedNeuralNetwork_Adagrad_l1_dropoutFalse_numHiddenLayers12	DeepFullyConnectedNeuralNetwork	0.671963	0.788711	0.887006	0	0.803802	0.671963	1	0
ColDataAugmentedDownsampledErc	All data	DeepFullyConnectedNeuralNetwork_Adagrad_l1_dropoutFalse_numHiddenLayers12	DeepFullyConnectedNeuralNetwork	0.497565	0.769944	0.749242	0	0.664499	0.497565	1	0
DbSmoteEqual1Erc	Partition data - db	DeepFullyConnectedNeuralNetwork_Adagrad_l1_dropoutFalse_numHiddenLayers12	DeepFullyConnectedNeuralNetwork	0.78105	0.704711	0.880594	0	0.877067	0.78105	1	0
DbSmoteEqual1Erc	Partition data - db	DeepFullyConnectedNeuralNetwork_Adagrad_l1_dropoutFalse_numHiddenLayers12	DeepFullyConnectedNeuralNetwork	0.78105	0.751143	0.904071	0	0.877067	0.78105	1	0
DbSmoteEqual1Erc	Partition data - db	DeepFullyConnectedNeuralNetwork_Adagrad_l1_dropoutFalse_numHiddenLayers5	DeepFullyConnectedNeuralNetwork	0.78105	0.744063	0.901755	0	0.877067	0.78105	1	0
DbSmoteEqual1Erc	Partition data - db	DeepFullyConnectedNeuralNetwork_Adagrad_l1_dropoutFalse_numHiddenLayers8	DeepFullyConnectedNeuralNetwork	0.78105	0.710804	0.882388	0	0.877067	0.78105	1	0
ColDataAugmentedDownsampledErc	All data	DeepFullyConnectedNeuralNetwork_Adagrad_l1_dropoutTrue_numHiddenLayers12	DeepFullyConnectedNeuralNetwork	0.497565	0.536065	0.538078	0	0.664499	0.497565	1	0
DbSmoteEqual0Point5Erc	Partition data - db	DeepFullyConnectedNeuralNetwork_Adagrad_l1_dropoutTrue_numHiddenLayers12	DeepFullyConnectedNeuralNetwork	0.639579	0.58628	0.692296	0	0.780175	0.639579	1	0
DbSmoteEqual1Erc	Partition data - db	DeepFullyConnectedNeuralNetwork_Adagrad_l1_dropoutTrue_numHiddenLayers12	DeepFullyConnectedNeuralNetwork	0.78105	0.758026	0.908843	0	0.877067	0.78105	1	0
DbSmoteEqual1Erc	Partition data - db	DeepFullyConnectedNeuralNetwork_Adagrad_l1_dropoutTrue_numHiddenLayers12	DeepFullyConnectedNeuralNetwork	0.78105	0.764151	0.911632	0	0.877067	0.78105	1	0
DbSmoteEqual1Erc	Partition data - db	DeepFullyConnectedNeuralNetwork_Adagrad_l1_dropoutTrue_numHiddenLayers14	DeepFullyConnectedNeuralNetwork	0.78105	0.744468	0.901772	0	0.877067	0.78105	1	0
DbSmoteEqual1Erc	Partition data - db	DeepFullyConnectedNeuralNetwork_Adagrad_l1_dropoutTrue_numHiddenLayers3	DeepFullyConnectedNeuralNetwork	0.78105	0.713428	0.891474	0	0.877067	0.78105	1	0
DbSmoteEqual1Erc	Partition data - db	DeepFullyConnectedNeuralNetwork_Adagrad_l1_dropoutTrue_numHiddenLayers5	DeepFullyConnectedNeuralNetwork	0.78105	0.765522	0.911426	0	0.877067	0.78105	1	0
DbSmoteEqual1Erc	Partition data - db	DeepFullyConnectedNeuralNetwork_Adagrad_l1_dropoutTrue_numHiddenLayers8	DeepFullyConnectedNeuralNetwork	0.78105	0.758187	0.908549	0	0.877067	0.78105	1	0
DbSmoteEqual1Erc	Partition data - db	DeepFullyConnectedNeuralNetwork_RMSprop_l1_dropoutFalse_numHiddenLayers1	DeepFullyConnectedNeuralNetwork	0.781226	0.725184	0.890435	0.0012575	0.877154	0.781188	1	0.000805369
DbSmoteEqual1Erc	Partition data - db	DeepFullyConnectedNeuralNetwork_RMSprop_l1_dropoutFalse_numHiddenLayers1	DeepFullyConnectedNeuralNetwork	0.78105	0.745284	0.901675	0	0.877067	0.78105	1	0
COLAugmentedpositivesx2	All data	DeepFullyConnectedNeuralNetwork_RMSprop_l1_dropoutFalse_numHiddenLayers12	DeepFullyConnectedNeuralNetwork	0.671963	0.80268	0.888616	0	0.803802	0.671963	1	0
DbSmoteEqual1Erc	Partition data - db	DeepFullyConnectedNeuralNetwork_RMSprop_l1_dropoutFalse_numHiddenLayers12	DeepFullyConnectedNeuralNetwork	0.78105	0.5	0.78105	0	0.877067	0.78105	1	0
DbSmoteEqual1Erc	Partition data - db	DeepFullyConnectedNeuralNetwork_RMSprop_l1_dropoutFalse_numHiddenLayers12	DeepFullyConnectedNeuralNetwork	0.78105	0.5	0.78105	0	0.877067	0.78105	1	0
DbSmoteEqual1Erc	Partition data - db	DeepFullyConnectedNeuralNetwork_RMSprop_l1_dropoutFalse_numHiddenLayers14	DeepFullyConnectedNeuralNetwork	0.78105	0.758294	0.907281	0	0.877067	0.78105	1	0
DbSmoteEqual1Erc	Partition data - db	DeepFullyConnectedNeuralNetwork_RMSprop_l1_dropoutFalse_numHiddenLayers3	DeepFullyConnectedNeuralNetwork	0.781931	0.754398	0.905569	0.00627613	0.877501	0.781739	1	0.00402685
DbSmoteEqual1Erc	Partition data - db	DeepFullyConnectedNeuralNetwork_RMSprop_l1_dropoutFalse_numHiddenLayers5	DeepFullyConnectedNeuralNetwork	0.78105	0.752144	0.904307	0	0.877067	0.78105	1	0
DbSmoteEqual1Erc	Partition data - db	DeepFullyConnectedNeuralNetwork_RMSprop_l1_dropoutFalse_numHiddenLayers5	DeepFullyConnectedNeuralNetwork	0.78105	0.645745	0.85855	0	0.877067	0.78105	1	0
DbSmoteEqual1Erc	Partition data - db	DeepFullyConnectedNeuralNetwork_RMSprop_l1_dropoutTrue_numHiddenLayers1	DeepFullyConnectedNeuralNetwork	0.78105	0.70769	0.884166	0	0.877067	0.78105	1	0
COLAugmentedpositivesx2	All data	DeepFullyConnectedNeuralNetwork_RMSprop_l1_dropoutTrue_numHiddenLayers12	DeepFullyConnectedNeuralNetwork	0.671963	0.775065	0.864054	0	0.803802	0.671963	1	0
ColDataAugmentedDownsampledErc	All data	DeepFullyConnectedNeuralNetwork_RMSprop_l1_dropoutTrue_numHiddenLayers12	DeepFullyConnectedNeuralNetwork	0.497565	0.5	0.497565	0	0.664499	0.497565	1	0
DbSmoteEqual0Point5Erc	Partition data - db	DeepFullyConnectedNeuralNetwork_RMSprop_l1_dropoutTrue_numHiddenLayers12	DeepFullyConnectedNeuralNetwork	0.639579	0.641187	0.756739	0	0.780175	0.639579	1	0
DbSmoteEqual1Erc	Partition data - db	DeepFullyConnectedNeuralNetwork_RMSprop_l1_dropoutTrue_numHiddenLayers12	DeepFullyConnectedNeuralNetwork	0.78105	0.750254	0.903553	0	0.877067	0.78105	1	0
DbSmoteEqual1Erc	Partition data - db	DeepFullyConnectedNeuralNetwork_RMSprop_l1_dropoutTrue_numHiddenLayers12	DeepFullyConnectedNeuralNetwork	0.78105	0.629274	0.852691	0	0.877067	0.78105	1	0
DbSmoteEqual1Erc	Partition data - db	DeepFullyConnectedNeuralNetwork_RMSprop_l1_dropoutTrue_numHiddenLayers14	DeepFullyConnectedNeuralNetwork	0.78105	0.754853	0.907476	0	0.877067	0.78105	1	0
DbSmoteEqual1Erc	Partition data - db	DeepFullyConnectedNeuralNetwork_RMSprop_l1_dropoutTrue_numHiddenLayers3	DeepFullyConnectedNeuralNetwork	0.78105	0.670548	0.871499	0	0.877067	0.78105	1	0
COLAugmentedpositivesx2	All data	DeepFullyConnectedNeuralNetwork_RMSprop_l1_dropoutTrue_numHiddenLayers5	DeepFullyConnectedNeuralNetwork	0.671963	0.812214	0.905034	0	0.803802	0.671963	1	0
DbSmoteEqual1Erc	Partition data - db	DeepFullyConnectedNeuralNetwork_RMSprop_l1_dropoutTrue_numHiddenLayers5	DeepFullyConnectedNeuralNetwork	0.78105	0.705074	0.882047	0	0.877067	0.78105	1	0
DbSmoteEqual1Erc	Partition data - db	DeepFullyConnectedNeuralNetwork_RMSprop_l1_dropoutTrue_numHiddenLayers5	DeepFullyConnectedNeuralNetwork	0.78105	0.755014	0.908302	0	0.877067	0.78105	1	0
DbSmoteEqual1Erc	Partition data - db	DeepFullyConnectedNeuralNetwork_RMSprop_l1_dropoutTrue_numHiddenLayers8	DeepFullyConnectedNeuralNetwork	0.78105	0.752438	0.906571	0	0.877067	0.78105	1	0
ColDataAugmentedDownsampledErc	All data	DeepFullyConnectedNeuralNetwork_SGD_l1_dropoutFalse_numHiddenLayers1	DeepFullyConnectedNeuralNetwork	0.497666	0.770167	0.74545	0.000200955	0.664544	0.497615	1	0.000201939
DbSmoteEqual1Erc	Partition data - db	DeepFullyConnectedNeuralNetwork_SGD_l1_dropoutFalse_numHiddenLayers1	DeepFullyConnectedNeuralNetwork	0.78152	0.73112	0.900174	0.0033508	0.877298	0.781417	1	0.00214765
COLAugmentedpositivesx2	All data	DeepFullyConnectedNeuralNetwork_SGD_l1_dropoutFalse_numHiddenLayers12	DeepFullyConnectedNeuralNetwork	0.671963	0.732531	0.845156	0	0.803802	0.671963	1	0
DbSmoteEqual0Point5Erc	Partition data - db	DeepFullyConnectedNeuralNetwork_SGD_l1_dropoutFalse_numHiddenLayers12	DeepFullyConnectedNeuralNetwork	0.639579	0.631504	0.728388	0	0.780175	0.639579	1	0
DbSmoteEqual1Erc	Partition data - db	DeepFullyConnectedNeuralNetwork_SGD_l1_dropoutFalse_numHiddenLayers12	DeepFullyConnectedNeuralNetwork	0.78105	0.634584	0.845741	0	0.877067	0.78105	1	0
DbSmoteEqual1Erc	Partition data - db	DeepFullyConnectedNeuralNetwork_SGD_l1_dropoutFalse_numHiddenLayers12	DeepFullyConnectedNeuralNetwork	0.78105	0.679671	0.867258	0	0.877067	0.78105	1	0
DbSmoteEqual1Erc	Partition data - db	DeepFullyConnectedNeuralNetwork_SGD_l1_dropoutFalse_numHiddenLayers14	DeepFullyConnectedNeuralNetwork	0.78105	0.744386	0.901044	0	0.877067	0.78105	1	0
COLAugmentedpositivesx2	All data	DeepFullyConnectedNeuralNetwork_SGD_l1_dropoutFalse_numHiddenLayers5	DeepFullyConnectedNeuralNetwork	0.671963	0.752297	0.874932	0	0.803802	0.671963	1	0
DbSmoteEqual1Erc	Partition data - db	DeepFullyConnectedNeuralNetwork_SGD_l1_dropoutFalse_numHiddenLayers5	DeepFullyConnectedNeuralNetwork	0.78105	0.687694	0.87491	0	0.877067	0.78105	1	0
DbSmoteEqual1Erc	Partition data - db	DeepFullyConnectedNeuralNetwork_SGD_l1_dropoutFalse_numHiddenLayers5	DeepFullyConnectedNeuralNetwork	0.78105	0.73041	0.896921	0	0.877067	0.78105	1	0
DbSmoteEqual1Erc	Partition data - db	DeepFullyConnectedNeuralNetwork_SGD_l1_dropoutFalse_numHiddenLayers8	DeepFullyConnectedNeuralNetwork	0.78105	0.628435	0.855292	0	0.877067	0.78105	1	0
AllDataSmoteEqual1Erc	All data	DeepFullyConnectedNeuralNetwork_SGD_l1_dropoutTrue_numHiddenLayers12	DeepFullyConnectedNeuralNetwork	0.498631	0.784564	0.739055	0	0.665449	0.498631	1	0
COLAugmentedpositivesx2	All data	DeepFullyConnectedNeuralNetwork_SGD_l1_dropoutTrue_numHiddenLayers12	DeepFullyConnectedNeuralNetwork	0.671963	0.698871	0.797558	0	0.803802	0.671963	1	0
ColDataAugmentedDownsampledErc	All data	DeepFullyConnectedNeuralNetwork_SGD_l1_dropoutTrue_numHiddenLayers12	DeepFullyConnectedNeuralNetwork	0.497565	0.627008	0.597204	0	0.664499	0.497565	1	0
DbSmoteEqual0Point5Erc	Partition data - db	DeepFullyConnectedNeuralNetwork_SGD_l1_dropoutTrue_numHiddenLayers12	DeepFullyConnectedNeuralNetwork	0.639579	0.53496	0.660617	0	0.780175	0.639579	1	0
DbSmoteEqual1Erc	Partition data - db	DeepFullyConnectedNeuralNetwork_SGD_l1_dropoutTrue_numHiddenLayers12	DeepFullyConnectedNeuralNetwork	0.78105	0.75703	0.908605	0	0.877067	0.78105	1	0
DbSmoteEqual1Erc	Partition data - db	DeepFullyConnectedNeuralNetwork_SGD_l1_dropoutTrue_numHiddenLayers12	DeepFullyConnectedNeuralNetwork	0.78105	0.625008	0.84844	0	0.877067	0.78105	1	0
DbSmoteEqual1Erc	Partition data - db	DeepFullyConnectedNeuralNetwork_SGD_l1_dropoutTrue_numHiddenLayers14	DeepFullyConnectedNeuralNetwork	0.78105	0.738518	0.900026	0	0.877067	0.78105	1	0
COLAugmentedpositivesx2	All data	DeepFullyConnectedNeuralNetwork_SGD_l1_dropoutTrue_numHiddenLayers5	DeepFullyConnectedNeuralNetwork	0.671963	0.752844	0.868082	0	0.803802	0.671963	1	0
DbSmoteEqual1Erc	Partition data - db	DeepFullyConnectedNeuralNetwork_SGD_l1_dropoutTrue_numHiddenLayers5	DeepFullyConnectedNeuralNetwork	0.78105	0.568417	0.826125	0	0.877067	0.78105	1	0
DbSmoteEqual1Erc	Partition data - db	DeepFullyConnectedNeuralNetwork_SGD_l1_dropoutTrue_numHiddenLayers5	DeepFullyConnectedNeuralNetwork	0.78105	0.762853	0.910957	0	0.877067	0.78105	1	0
DbSmoteEqual1Erc	Partition data - db	DeepFullyConnectedNeuralNetwork_SGD_l1_dropoutTrue_numHiddenLayers8	DeepFullyConnectedNeuralNetwork	0.78105	0.764372	0.911604	0	0.877067	0.78105	1	0
COLAugmentedpositivesx2	All data	DeepFullyConnectedNeuralNetwork_Adagrad_l1_dropoutFalse_numHiddenLayers5	DeepFullyConnectedNeuralNetwork	0.672167	0.827699	0.912513	0.000903628	0.803891	0.672112	0.99995	0.000722991
COLAugmentedpositivesx2	All data	DeepFullyConnectedNeuralNetwork_RMSprop_l1_dropoutFalse_numHiddenLayers5	DeepFullyConnectedNeuralNetwork	0.674504	0.79264	0.887715	0.0118532	0.804859	0.673923	0.998941	0.00991531
AllDataAugmentedDownsampledErc	All data	DeepFullyConnectedNeuralNetwork_SGD_l1_dropoutFalse_numHiddenLayers12	DeepFullyConnectedNeuralNetwork	0.579204	0.878884	0.845561	0.155935	0.704187	0.543955	0.998234	0.157246
DbSmoteEqual1Erc	Partition data - db	DeepFullyConnectedNeuralNetwork_RMSprop_l1_dropoutTrue_numHiddenLayers1	DeepFullyConnectedNeuralNetwork	0.783342	0.725141	0.89235	0.0253247	0.877947	0.783881	0.997667	0.0187919
COLAugmentedpositivesx2	All data	DeepFullyConnectedNeuralNetwork_SGD_l1_dropoutFalse_numHiddenLayers1	DeepFullyConnectedNeuralNetwork	0.691614	0.806466	0.899851	0.0935841	0.811561	0.688468	0.988252	0.0839703
DbSmoteEqual1Erc	Partition data - db	DeepFullyConnectedNeuralNetwork_Adagrad_l1_dropoutFalse_numHiddenLayers1	DeepFullyConnectedNeuralNetwork	0.802445	0.762768	0.910269	0.182805	0.886495	0.80408	0.987733	0.141477
DbSmoteEqual0Point5Erc	Partition data - db	DeepFullyConnectedNeuralNetwork_Adagrad_l1_dropoutFalse_numHiddenLayers12	DeepFullyConnectedNeuralNetwork	0.681262	0.753765	0.832481	0.155185	0.79816	0.670737	0.985351	0.141645
DbSmoteEqual1Erc	Partition data - db	RFC_n_estimators-500_max_depth-20_GridSearch	RFC	0.885852	0.926147	0.975287	0.617479	0.930384	0.888349	0.976595	0.562148
AllDataSmoteEqual1Erc	All data	DeepFullyConnectedNeuralNetwork_Adagrad_l1_dropoutTrue_numHiddenLayers12	DeepFullyConnectedNeuralNetwork	0.83091	0.869874	0.797273	0.662084	0.851892	0.756237	0.97525	0.687358
DbSmoteEqual1Erc	Partition data - db	DeepFullyConnectedNeuralNetwork_Adagrad_l1_dropoutFalse_numHiddenLayers1	DeepFullyConnectedNeuralNetwork	0.805678	0.762312	0.910506	0.248074	0.886415	0.815527	0.970801	0.216644
DbSmoteEqual1Erc	Partition data - db	DeepFullyConnectedNeuralNetwork_Adagrad_l1_dropoutFalse_numHiddenLayers14	DeepFullyConnectedNeuralNetwork	0.771116	0.678874	0.871971	0.0463029	0.86873	0.786822	0.969672	0.0628188
DbSmoteEqual1Erc	Partition data - db	DeepFullyConnectedNeuralNetwork_RMSprop_l1_dropoutFalse_numHiddenLayers8	DeepFullyConnectedNeuralNetwork	0.805972	0.763433	0.910293	0.255021	0.886349	0.816907	0.968694	0.225503
DbSmoteEqual1Erc	Partition data - db	DeepFullyConnectedNeuralNetwork_SGD_l1_dropoutTrue_numHiddenLayers3	DeepFullyConnectedNeuralNetwork	0.806971	0.767565	0.911959	0.260827	0.886852	0.81787	0.968543	0.230604
DbSmoteEqual1Erc	Partition data - db	RFC_n_estimators-388_max_depth-35_RandomSearch	RFC	0.895257	0.93784	0.978585	0.6653	0.935096	0.906056	0.96606	0.642685
DbSmoteEqual1Erc	Partition data - db	KNC_metric-euclidean_n_neighbors-3_p-7219.987722668247_RandomSearch	KNC	0.863928	0.82273	0.91191	0.540396	0.917224	0.873765	0.965232	0.50255
DbSmoteEqual1Erc	Partition data - db	KNC_metric-euclidean_n_neighbors-3_p-7219.987722668247_RandomSearch	KNC	0.863928	0.82273	0.91191	0.540396	0.917224	0.873765	0.965232	0.50255
DbSmoteEqual1Erc	Partition data - db	DeepFullyConnectedNeuralNetwork_SGD_l1_dropoutTrue_numHiddenLayers1	DeepFullyConnectedNeuralNetwork	0.80797	0.773421	0.914742	0.2779	0.886873	0.821371	0.963727	0.252349
NdbSmoteEqual1Erc	Partition data - ndb	DeepFullyConnectedNeuralNetwork_Adagrad_l1_dropoutTrue_numHiddenLayers12	DeepFullyConnectedNeuralNetwork	0.840893	0.89091	0.759749	0.685264	0.828033	0.726701	0.962204	0.760656
DbSmoteEqual1Erc	Partition data - db	DecisionTreeC_max_depth-5_min_samples_split-2_GridSearch	DecisionTreeC	0.81473	0.797324	0.919255	0.316814	0.890251	0.828409	0.962071	0.289128
DbSmoteEqual1Erc	Partition data - db	DecisionTreeC_max_depth-5_min_samples_split-2_GridSearch	DecisionTreeC	0.81473	0.797324	0.919255	0.316814	0.890251	0.828409	0.962071	0.289128
DbSmoteEqual1Erc	Partition data - db	LogRegression_penalty-l2_C-0.05061583846218687_solver-lbfgs_RandomSearch	LogRegression	0.807147	0.771937	0.913879	0.284583	0.885954	0.823203	0.959061	0.265235
DbSmoteEqual1Erc	Partition data - db	DeepFullyConnectedNeuralNetwork_SGD_l1_dropoutTrue_numHiddenLayers1	DeepFullyConnectedNeuralNetwork	0.808147	0.765901	0.910695	0.290291	0.886454	0.824233	0.958835	0.270604
DbSmoteEqual1Erc	Partition data - db	LogRegression_penalty-l2_C-0.1_solver-liblinear_GridSearch	LogRegression	0.807147	0.771944	0.913881	0.285109	0.88593	0.823328	0.958835	0.26604
NdbSmoteEqual1Erc	Partition data - ndb	DeepFullyConnectedNeuralNetwork_SGD_l1_dropoutFalse_numHiddenLayers5	DeepFullyConnectedNeuralNetwork	0.839161	0.916424	0.837568	0.681666	0.825909	0.725633	0.958342	0.760332
AllDataAugmentedDownsampledErc	All data	DeepFullyConnectedNeuralNetwork_Adagrad_l1_dropoutTrue_numHiddenLayers5	DeepFullyConnectedNeuralNetwork	0.846813	0.918341	0.895571	0.693399	0.861824	0.787163	0.952132	0.74076
AllDataSmoteEqual0Point5Erc	All data	DeepFullyConnectedNeuralNetwork_Adagrad_l1_dropoutTrue_numHiddenLayers12	DeepFullyConnectedNeuralNetwork	0.803557	0.879648	0.685622	0.605751	0.762933	0.63884	0.946856	0.731744
NdbSmoteEqual1Erc	Partition data - ndb	DeepFullyConnectedNeuralNetwork_RMSprop_l1_dropoutTrue_numHiddenLayers5	DeepFullyConnectedNeuralNetwork	0.852865	0.926795	0.854623	0.705953	0.836509	0.750043	0.945508	0.79159
AllDataAugmentedDownsampledErc	All data	DeepFullyConnectedNeuralNetwork_SGD_l1_dropoutFalse_numHiddenLayers5	DeepFullyConnectedNeuralNetwork	0.836529	0.887804	0.848036	0.672816	0.852493	0.778879	0.941473	0.730852
AllDataAugmentedDownsampledErc	All data	DeepFullyConnectedNeuralNetwork_RMSprop_l1_dropoutFalse_numHiddenLayers5	DeepFullyConnectedNeuralNetwork	0.835548	0.898356	0.860952	0.670851	0.851705	0.777737	0.941221	0.729138
DbSmoteEqual0Point5Erc	Partition data - db	DeepFullyConnectedNeuralNetwork_SGD_l1_dropoutFalse_numHiddenLayers1	DeepFullyConnectedNeuralNetwork	0.714723	0.765533	0.840986	0.291486	0.808325	0.708718	0.940508	0.314058
AllDataSmoteEqual1Erc	All data	DeepFullyConnectedNeuralNetwork_Adagrad_l1_dropoutFalse_numHiddenLayers12	DeepFullyConnectedNeuralNetwork	0.832967	0.904333	0.87286	0.666127	0.84873	0.773789	0.939743	0.726774
AllDataSmoteEqual1Erc	All data	DeepFullyConnectedNeuralNetwork_Adagrad_l1_dropoutFalse_numHiddenLayers5	DeepFullyConnectedNeuralNetwork	0.837682	0.905992	0.870734	0.675541	0.852208	0.780422	0.938537	0.737377
DbSmoteEqual1Erc	Partition data - db	DeepFullyConnectedNeuralNetwork_Adagrad_l1_dropoutTrue_numHiddenLayers1	DeepFullyConnectedNeuralNetwork	0.805502	0.77476	0.915618	0.323112	0.882788	0.833902	0.937763	0.333691
NdbSmoteEqual1Erc	Partition data - ndb	DeepFullyConnectedNeuralNetwork_Adagrad_l1_dropoutFalse_numHiddenLayers12	DeepFullyConnectedNeuralNetwork	0.854771	0.929969	0.864026	0.708506	0.836709	0.757359	0.934631	0.80195
DbSmoteEqual1Erc	Partition data - db	DeepFullyConnectedNeuralNetwork_SGD_l1_dropoutFalse_numHiddenLayers3	DeepFullyConnectedNeuralNetwork	0.804561	0.77242	0.914624	0.332126	0.88155	0.836975	0.931141	0.35302
DbSmoteEqual1Erc	Partition data - db	DeepFullyConnectedNeuralNetwork_SGD_l1_dropoutFalse_numHiddenLayers1	DeepFullyConnectedNeuralNetwork	0.80221	0.77193	0.913718	0.32164	0.880262	0.834897	0.93084	0.343356
NdbSmoteEqual1Erc	Partition data - ndb	DeepFullyConnectedNeuralNetwork_Adagrad_l1_dropoutTrue_numHiddenLayers1	DeepFullyConnectedNeuralNetwork	0.867068	0.94196	0.897443	0.731217	0.847461	0.780095	0.927561	0.827057
AllDataAugmentedDownsampledErc	All data	DeepFullyConnectedNeuralNetwork_Adagrad_l1_dropoutFalse_numHiddenLayers1	DeepFullyConnectedNeuralNetwork	0.84463	0.914482	0.892006	0.689078	0.856918	0.796479	0.927283	0.7614
AllDataSmoteEqual1Erc	All data	DecisionTreeC_max_depth-1_min_samples_split-2_GridSearch	DecisionTreeC	0.844817	0.845042	0.773903	0.689772	0.856251	0.795615	0.926892	0.763191
DbSmoteEqual1Erc	Partition data - db	DeepFullyConnectedNeuralNetwork_Adagrad_l1_dropoutTrue_numHiddenLayers1	DeepFullyConnectedNeuralNetwork	0.802151	0.772496	0.914609	0.330317	0.879726	0.837529	0.9264	0.358926
DbSmoteEqual0Point5Erc	Partition data - db	DeepFullyConnectedNeuralNetwork_SGD_l1_dropoutTrue_numHiddenLayers5	DeepFullyConnectedNeuralNetwork	0.68413	0.681572	0.760726	0.208687	0.789527	0.687944	0.926308	0.254377
DbSmoteEqual1Erc	Partition data - db	DeepFullyConnectedNeuralNetwork_Adagrad_l1_dropoutFalse_numHiddenLayers3	DeepFullyConnectedNeuralNetwork	0.803092	0.774103	0.914942	0.338384	0.880014	0.839598	0.924518	0.369933
AllDataSmoteEqual1Erc	All data	DeepFullyConnectedNeuralNetwork_Adagrad_l1_dropoutFalse_numHiddenLayers1	DeepFullyConnectedNeuralNetwork	0.848014	0.917523	0.89183	0.696151	0.858356	0.801752	0.92356	0.772879
AllDataSmoteEqual1Erc	All data	DeepFullyConnectedNeuralNetwork_RMSprop_l1_dropoutFalse_numHiddenLayers1	DeepFullyConnectedNeuralNetwork	0.84515	0.902933	0.866182	0.690423	0.855455	0.80016	0.918959	0.771743
DbSmoteEqual1Erc	Partition data - db	DecisionTreeC_max_depth-32_min_samples_split-2_RandomSearch	DecisionTreeC	0.869453	0.860402	0.932989	0.61768	0.916482	0.915896	0.917068	0.699597
AllDataSmoteEqual1Erc	All data	DeepFullyConnectedNeuralNetwork_SGD_l1_dropoutTrue_numHiddenLayers5	DeepFullyConnectedNeuralNetwork	0.820246	0.884187	0.842516	0.640679	0.835631	0.767977	0.916357	0.724659
AllDataAugmentedDownsampledErc	All data	DeepFullyConnectedNeuralNetwork_Adagrad_l1_dropoutTrue_numHiddenLayers1	DeepFullyConnectedNeuralNetwork	0.8558	0.923019	0.903046	0.711477	0.864371	0.818407	0.915805	0.795377
AllDataAugmentedDownsampledErc	All data	DeepFullyConnectedNeuralNetwork_RMSprop_l1_dropoutFalse_numHiddenLayers1	DeepFullyConnectedNeuralNetwork	0.84232	0.908413	0.879089	0.684476	0.853549	0.799218	0.915805	0.768322
ColDataAugmentedDownsampledErc	All data	DeepFullyConnectedNeuralNetwork_RMSprop_l1_dropoutFalse_numHiddenLayers12	DeepFullyConnectedNeuralNetwork	0.616985	0.714801	0.68439	0.236177	0.704084	0.571883	0.915783	0.321082
DbSmoteEqual1Erc	Partition data - db	DeepFullyConnectedNeuralNetwork_Adagrad_l1_dropoutFalse_numHiddenLayers5	DeepFullyConnectedNeuralNetwork	0.799447	0.772281	0.914696	0.341062	0.876894	0.842251	0.914509	0.388993
NdbSmoteEqual1Erc	Partition data - ndb	DeepFullyConnectedNeuralNetwork_Adagrad_l1_dropoutFalse_numHiddenLayers5	DeepFullyConnectedNeuralNetwork	0.855702	0.929352	0.867118	0.708321	0.834554	0.767685	0.914183	0.817021
AllDataSmoteEqual1Erc	All data	DecisionTreeC_max_depth-33_min_samples_split-2_RandomSearch	DecisionTreeC	0.907283	0.909326	0.869445	0.814571	0.90765	0.901625	0.913755	0.900846
AllDataAugmentedDownsampledErc	All data	DeepFullyConnectedNeuralNetwork_Adagrad_l1_dropoutFalse_numHiddenLayers5	DeepFullyConnectedNeuralNetwork	0.836877	0.901399	0.872129	0.67358	0.848787	0.793419	0.912462	0.760765
DbSmoteEqual1Erc	Partition data - db	DecisionTreeC_max_depth-38_min_samples_split-13_RandomSearch	DecisionTreeC	0.867454	0.882897	0.947029	0.615768	0.914864	0.917948	0.9118	0.709262
AllDataAugmentedDownsampledErc	All data	DeepFullyConnectedNeuralNetwork_SGD_l1_dropoutFalse_numHiddenLayers1	DeepFullyConnectedNeuralNetwork	0.841909	0.905899	0.87942	0.683664	0.852451	0.8016	0.910192	0.773149
AllDataSmoteEqual1Erc	All data	DeepFullyConnectedNeuralNetwork_SGD_l1_dropoutTrue_numHiddenLayers1	DeepFullyConnectedNeuralNetwork	0.838932	0.906559	0.875326	0.677986	0.849212	0.796344	0.909599	0.768651
AllDataSmoteEqual1Erc	All data	DeepFullyConnectedNeuralNetwork_RMSprop_l1_dropoutFalse_numHiddenLayers5	DeepFullyConnectedNeuralNetwork	0.845624	0.912788	0.882741	0.691351	0.854262	0.807022	0.907377	0.784209
AllDataAugmentedDownsampledErc	All data	DecisionTreeC_max_depth-4_min_samples_split-2_GridSearch	DecisionTreeC	0.852256	0.917755	0.884339	0.704397	0.860306	0.81841	0.906723	0.797409
AllDataAugmentedDownsampledErc	All data	DeepFullyConnectedNeuralNetwork_SGD_l1_dropoutTrue_numHiddenLayers1	DeepFullyConnectedNeuralNetwork	0.850041	0.920347	0.89982	0.699963	0.858398	0.815627	0.905903	0.793789
DbSmoteEqual1Erc	Partition data - db	KNC_metric-cityblock_n_neighbors-2_p-1_GridSearch	KNC	0.858814	0.816409	0.908057	0.593485	0.90907	0.91461	0.903597	0.69906
DbSmoteEqual1Erc	Partition data - db	KNC_metric-cityblock_n_neighbors-2_p-1_GridSearch	KNC	0.858814	0.816409	0.908057	0.593485	0.90907	0.91461	0.903597	0.69906
AllDataSmoteEqual1Erc	All data	DeepFullyConnectedNeuralNetwork_RMSprop_l1_dropoutTrue_numHiddenLayers1	DeepFullyConnectedNeuralNetwork	0.837761	0.898395	0.861482	0.675634	0.847238	0.798534	0.902269	0.773605
NdbSmoteEqual1Erc	Partition data - ndb	DecisionTreeC_max_depth-26_min_samples_split-12_RandomSearch	DecisionTreeC	0.914114	0.950654	0.907897	0.821345	0.893122	0.884991	0.901403	0.922521
AllDataAugmentedDownsampledErc	All data	DeepFullyConnectedNeuralNetwork_RMSprop_l1_dropoutTrue_numHiddenLayers5	DeepFullyConnectedNeuralNetwork	0.830296	0.901405	0.869569	0.660427	0.841552	0.791618	0.898209	0.761908
DbSmoteEqual0Point5Erc	Partition data - db	KNC_metric-nan_euclidean_n_neighbors-3_p-4251.558744912447_RandomSearch	KNC	0.790631	0.81822	0.84105	0.523009	0.845861	0.799282	0.898206	0.599735
AllDataAugmentedDownsampledErc	All data	DecisionTreeC_max_depth-17_min_samples_split-11_RandomSearch	DecisionTreeC	0.8764	0.936906	0.923478	0.752761	0.879392	0.861464	0.898083	0.854566
AllDataSmoteEqual0Point5Erc	All data	DeepFullyConnectedNeuralNetwork_Adagrad_l1_dropoutTrue_numHiddenLayers5	DeepFullyConnectedNeuralNetwork	0.827648	0.914699	0.806068	0.6404	0.776605	0.684485	0.897378	0.792704
NdbSmoteEqual1Erc	Partition data - ndb	DeepFullyConnectedNeuralNetwork_Adagrad_l1_dropoutFalse_numHiddenLayers1	DeepFullyConnectedNeuralNetwork	0.865141	0.936784	0.884501	0.724552	0.840792	0.793172	0.894496	0.845725
AllDataAugmentedDownsampledErc	All data	DeepFullyConnectedNeuralNetwork_Adagrad_l1_dropoutFalse_numHiddenLayers12	DeepFullyConnectedNeuralNetwork	0.828935	0.895926	0.857697	0.65771	0.839927	0.791639	0.894488	0.762924
COLAugmentedpositivesx2	All data	DeepFullyConnectedNeuralNetwork_RMSprop_l1_dropoutTrue_numHiddenLayers1	DeepFullyConnectedNeuralNetwork	0.731526	0.802691	0.899898	0.324531	0.817377	0.75277	0.894116	0.398471
DbSmoteEqual1Erc	Partition data - db	DeepFullyConnectedNeuralNetwork_Adagrad_l1_dropoutTrue_numHiddenLayers5	DeepFullyConnectedNeuralNetwork	0.785928	0.762785	0.911898	0.330095	0.866378	0.845289	0.888546	0.419866
NdbSmoteEqual1Erc	Partition data - ndb	DeepFullyConnectedNeuralNetwork_RMSprop_l1_dropoutFalse_numHiddenLayers5	DeepFullyConnectedNeuralNetwork	0.862954	0.934431	0.878279	0.71974	0.837642	0.79267	0.888025	0.846372
AllDataSmoteEqual0Point5Erc	All data	DeepFullyConnectedNeuralNetwork_SGD_l1_dropoutFalse_numHiddenLayers5	DeepFullyConnectedNeuralNetwork	0.807312	0.898938	0.770322	0.601652	0.754489	0.656485	0.886888	0.767433
AllDataSmoteEqual1Erc	All data	DeepFullyConnectedNeuralNetwork_SGD_l1_dropoutFalse_numHiddenLayers1	DeepFullyConnectedNeuralNetwork	0.83072	0.898965	0.864214	0.66154	0.839168	0.797303	0.885673	0.776067
NdbSmoteEqual1Erc	Partition data - ndb	DecisionTreeC_max_depth-5_min_samples_split-2_GridSearch	DecisionTreeC	0.874321	0.942433	0.89489	0.741329	0.84835	0.816299	0.883022	0.868566
COLAugmentedpositivesx2	All data	DeepFullyConnectedNeuralNetwork_Adagrad_l1_dropoutTrue_numHiddenLayers1	DeepFullyConnectedNeuralNetwork	0.799017	0.881729	0.944571	0.528275	0.855091	0.829361	0.882469	0.628073
AllDataSmoteEqual1Erc	All data	DeepFullyConnectedNeuralNetwork_Adagrad_l1_dropoutTrue_numHiddenLayers1	DeepFullyConnectedNeuralNetwork	0.851668	0.921976	0.89878	0.703379	0.855201	0.833133	0.878471	0.825013
COLAugmentedpositivesx2	All data	DecisionTreeC_max_depth-None_min_samples_split-13_RandomSearch	DecisionTreeC	0.866271	0.941052	0.972139	0.703825	0.898145	0.919865	0.877427	0.843421
COLAugmentedpositivesx2	All data	DeepFullyConnectedNeuralNetwork_RMSprop_l1_dropoutFalse_numHiddenLayers1	DeepFullyConnectedNeuralNetwork	0.752702	0.820466	0.908303	0.400668	0.826582	0.781587	0.877074	0.497934
AllDataSmoteEqual0Point5Erc	All data	DeepFullyConnectedNeuralNetwork_Adagrad_l1_dropoutFalse_numHiddenLayers5	DeepFullyConnectedNeuralNetwork	0.816699	0.901578	0.770195	0.615819	0.760389	0.674577	0.871216	0.789379
AllDataSmoteEqual0Point5Erc	All data	DecisionTreeC_max_depth-1_min_samples_split-2_GridSearch	DecisionTreeC	0.832606	0.841086	0.652814	0.644456	0.775613	0.701914	0.866603	0.815568
COLAugmentedpositivesx2	All data	DeepFullyConnectedNeuralNetwork_Adagrad_l1_dropoutFalse_numHiddenLayers1	DeepFullyConnectedNeuralNetwork	0.759546	0.832441	0.916319	0.427537	0.828794	0.794542	0.866132	0.54121
AllDataSmoteEqual1Erc	All data	DeepFullyConnectedNeuralNetwork_SGD_l1_dropoutFalse_numHiddenLayers5	DeepFullyConnectedNeuralNetwork	0.817857	0.885841	0.846374	0.635806	0.825666	0.789739	0.865017	0.770954
NdbSmoteEqual1Erc	Partition data - ndb	DeepFullyConnectedNeuralNetwork_SGD_l1_dropoutTrue_numHiddenLayers1	DeepFullyConnectedNeuralNetwork	0.847128	0.918926	0.838202	0.686869	0.818058	0.777337	0.86328	0.836445
DbSmoteEqual0Point5Erc	Partition data - db	DeepFullyConnectedNeuralNetwork_SGD_l1_dropoutFalse_numHiddenLayers5	DeepFullyConnectedNeuralNetwork	0.721511	0.764926	0.840934	0.355704	0.798534	0.743081	0.86293	0.470557
DbSmoteEqual0Point5Erc	Partition data - db	DeepFullyConnectedNeuralNetwork_Adagrad_l1_dropoutFalse_numHiddenLayers1	DeepFullyConnectedNeuralNetwork	0.716348	0.762364	0.839912	0.343517	0.794884	0.739421	0.859342	0.462599
COLAugmentedpositivesx2	All data	DecisionTreeC_max_depth-5_min_samples_split-2_GridSearch	DecisionTreeC	0.846586	0.926586	0.96245	0.661895	0.882573	0.908635	0.857964	0.82328
DbSmoteEqual0Point5Erc	Partition data - db	DeepFullyConnectedNeuralNetwork_RMSprop_l1_dropoutFalse_numHiddenLayers1	DeepFullyConnectedNeuralNetwork	0.721415	0.764026	0.838125	0.358612	0.797357	0.745514	0.856951	0.480902
AllDataSmoteEqual0Point5Erc	All data	DeepFullyConnectedNeuralNetwork_Adagrad_l1_dropoutFalse_numHiddenLayers1	DeepFullyConnectedNeuralNetwork	0.832627	0.914099	0.804668	0.642279	0.772964	0.706344	0.85346	0.822186
NdbSmoteEqual1Erc	Partition data - ndb	DeepFullyConnectedNeuralNetwork_SGD_l1_dropoutFalse_numHiddenLayers1	DeepFullyConnectedNeuralNetwork	0.848817	0.923436	0.861753	0.688798	0.817509	0.786889	0.850609	0.847631
COLAugmentedpositivesx2	All data	DeepFullyConnectedNeuralNetwork_SGD_l1_dropoutTrue_numHiddenLayers1	DeepFullyConnectedNeuralNetwork	0.779095	0.854005	0.928682	0.491201	0.837972	0.826187	0.850098	0.63365
DbSmoteEqual0Point5Erc	Partition data - db	DecisionTreeC_max_depth-None_min_samples_split-2_RandomSearch	DecisionTreeC	0.801912	0.784268	0.812396	0.569344	0.845604	0.843091	0.848132	0.719894
DbSmoteEqual0Point5Erc	Partition data - db	DeepFullyConnectedNeuralNetwork_SGD_l1_dropoutTrue_numHiddenLayers1	DeepFullyConnectedNeuralNetwork	0.71912	0.76386	0.840571	0.357357	0.794229	0.747232	0.847534	0.491247
AllDataSmoteEqual0Point5Erc	All data	DeepFullyConnectedNeuralNetwork_Adagrad_l1_dropoutFalse_numHiddenLayers12	DeepFullyConnectedNeuralNetwork	0.819379	0.902647	0.771662	0.614634	0.755804	0.688777	0.837283	0.810406
ColDataAugmentedDownsampledErc	All data	DeepFullyConnectedNeuralNetwork_Adagrad_l1_dropoutTrue_numHiddenLayers5	DeepFullyConnectedNeuralNetwork	0.696327	0.778507	0.755742	0.393429	0.730966	0.653593	0.829119	0.564822
AllDataSmoteEqual0Point5Erc	All data	DeepFullyConnectedNeuralNetwork_SGD_l1_dropoutTrue_numHiddenLayers1	DeepFullyConnectedNeuralNetwork	0.820919	0.901851	0.777542	0.615302	0.754703	0.695293	0.825213	0.818766
DbSmoteEqual0Point5Erc	Partition data - db	DeepFullyConnectedNeuralNetwork_RMSprop_l1_dropoutFalse_numHiddenLayers5	DeepFullyConnectedNeuralNetwork	0.716922	0.759312	0.834586	0.364472	0.78797	0.756289	0.822422	0.529708
ColDataAugmentedDownsampledErc	All data	DeepFullyConnectedNeuralNetwork_SGD_l1_dropoutFalse_numHiddenLayers12	DeepFullyConnectedNeuralNetwork	0.615564	0.654919	0.602162	0.232653	0.680064	0.580343	0.821166	0.411955
DbSmoteEqual0Point5Erc	Partition data - db	DeepFullyConnectedNeuralNetwork_Adagrad_l1_dropoutTrue_numHiddenLayers1	DeepFullyConnectedNeuralNetwork	0.71979	0.770995	0.846008	0.375625	0.788207	0.762904	0.815247	0.550398
AllDataSmoteEqual0Point5Erc	All data	DecisionTreeC_max_depth-29_min_samples_split-10_RandomSearch	DecisionTreeC	0.878468	0.925595	0.845829	0.724646	0.815133	0.828074	0.802591	0.916492
AllDataSmoteEqual0Point5Erc	All data	DeepFullyConnectedNeuralNetwork_SGD_l1_dropoutFalse_numHiddenLayers1	DeepFullyConnectedNeuralNetwork	0.804865	0.891545	0.755769	0.581024	0.732968	0.674728	0.802212	0.806194
ColDataSmoteEqual1Erc	All data	DeepFullyConnectedNeuralNetwork_Adagrad_l1_dropoutFalse_numHiddenLayers5	DeepFullyConnectedNeuralNetwork	0.613312	0.652749	0.625494	0.221837	0.67758	0.587773	0.79978	0.420749
ColDataSmoteEqual1Erc	All data	DeepFullyConnectedNeuralNetwork_Adagrad_l1_dropoutFalse_numHiddenLayers12	DeepFullyConnectedNeuralNetwork	0.692811	0.759899	0.736478	0.38345	0.725135	0.664752	0.797583	0.584614
AllDataSmoteEqual0Point5Erc	All data	DeepFullyConnectedNeuralNetwork_Adagrad_l1_dropoutTrue_numHiddenLayers1	DeepFullyConnectedNeuralNetwork	0.847436	0.921826	0.823935	0.661346	0.777244	0.758188	0.797283	0.87257
ColDataAugmentedDownsampledErc	All data	DeepFullyConnectedNeuralNetwork_Adagrad_l1_dropoutTrue_numHiddenLayers1	DeepFullyConnectedNeuralNetwork	0.713271	0.795632	0.78076	0.427	0.734398	0.681137	0.796697	0.630654
ColDataAugmentedDownsampledErc	All data	DeepFullyConnectedNeuralNetwork_SGD_l1_dropoutFalse_numHiddenLayers5	DeepFullyConnectedNeuralNetwork	0.706778	0.778753	0.757026	0.414049	0.729502	0.674221	0.794657	0.61975
AllDataSmoteEqual0Point5Erc	All data	DeepFullyConnectedNeuralNetwork_RMSprop_l1_dropoutFalse_numHiddenLayers5	DeepFullyConnectedNeuralNetwork	0.838027	0.914913	0.809632	0.642442	0.766072	0.73966	0.794439	0.859871
DbSmoteEqual0Point5Erc	Partition data - db	DeepFullyConnectedNeuralNetwork_Adagrad_l1_dropoutTrue_numHiddenLayers5	DeepFullyConnectedNeuralNetwork	0.709847	0.760402	0.838265	0.361445	0.777313	0.763366	0.791779	0.564456
ColDataSmoteEqual1Erc	All data	KNC_metric-euclidean_n_neighbors-3_p-7219.987722668247_RandomSearch	KNC	0.743088	0.800837	0.74635	0.485293	0.757935	0.726939	0.791692	0.692895
DbSmoteEqual0Point5Erc	Partition data - db	DeepFullyConnectedNeuralNetwork_Adagrad_l1_dropoutFalse_numHiddenLayers5	DeepFullyConnectedNeuralNetwork	0.714436	0.765489	0.841994	0.373384	0.780028	0.768762	0.791629	0.577454
COLAugmentedpositivesx2	All data	DeepFullyConnectedNeuralNetwork_Adagrad_l1_dropoutTrue_numHiddenLayers5	DeepFullyConnectedNeuralNetwork	0.759512	0.83331	0.916633	0.471324	0.815454	0.841806	0.790702	0.695621
AllDataSmoteEqual0Point5Erc	All data	DeepFullyConnectedNeuralNetwork_RMSprop_l1_dropoutFalse_numHiddenLayers1	DeepFullyConnectedNeuralNetwork	0.829631	0.903566	0.770381	0.624941	0.755273	0.72559	0.787488	0.850751
ColDataAugmentedDownsampledErc	All data	DeepFullyConnectedNeuralNetwork_SGD_l1_dropoutTrue_numHiddenLayers1	DeepFullyConnectedNeuralNetwork	0.705966	0.786165	0.765598	0.412349	0.725308	0.677648	0.780179	0.632472
DbSmoteEqual0Point5Erc	Partition data - db	DecisionTreeC_max_depth-1_min_samples_split-2_GridSearch	DecisionTreeC	0.717591	0.694533	0.749012	0.388437	0.77876	0.780396	0.77713	0.611936
DbSmoteEqual0Point5Erc	Partition data - db	KNC_metric-cityblock_n_neighbors-2_p-1_GridSearch	KNC	0.775143	0.812188	0.832717	0.52986	0.815298	0.858868	0.775934	0.77374
AllDataAugmentedDownsampledErc	All data	DeepFullyConnectedNeuralNetwork_RMSprop_l1_dropoutTrue_numHiddenLayers1	DeepFullyConnectedNeuralNetwork	0.810234	0.903908	0.876259	0.620558	0.803821	0.835044	0.774849	0.845866
MergedImputed	All data	DeepFullyConnectedNeuralNetwork_RMSprop_l1_dropoutTrue_numHiddenLayers5	DeepFullyConnectedNeuralNetwork	0.864631	0.913881	0.615972	0.526233	0.603526	0.498544	0.764515	0.880225
DbSmoteEqual0Point5Erc	Partition data - db	DeepFullyConnectedNeuralNetwork_RMSprop_l1_dropoutTrue_numHiddenLayers1	DeepFullyConnectedNeuralNetwork	0.699426	0.751936	0.833064	0.348725	0.764706	0.765737	0.763677	0.585411
ColDataAugmentedDownsampledErc	All data	DecisionTreeC_max_depth-4_min_samples_split-2_GridSearch	DecisionTreeC	0.720272	0.78467	0.752975	0.440762	0.730419	0.701672	0.761623	0.679321
AllDataAugmentedDownsampledErc	All data	DeepFullyConnectedNeuralNetwork_RMSprop_l1_dropoutTrue_numHiddenLayers12	DeepFullyConnectedNeuralNetwork	0.784982	0.883246	0.847334	0.570042	0.779605	0.802538	0.757947	0.812206
ColDataAugmentedDownsampledErc	All data	KNC_metric-cosine_n_neighbors-89_p-3337.0861113902183_RandomSearch	KNC	0.7222	0.799194	0.777867	0.444567	0.729927	0.706916	0.754486	0.690226
ColDataSmoteEqual1Erc	All data	DeepFullyConnectedNeuralNetwork_Adagrad_l1_dropoutFalse_numHiddenLayers1	DeepFullyConnectedNeuralNetwork	0.714423	0.78565	0.770986	0.428048	0.728396	0.704696	0.753745	0.673817
ColDataSmoteEqual1Erc	All data	DeepFullyConnectedNeuralNetwork_Adagrad_l1_dropoutTrue_numHiddenLayers5	DeepFullyConnectedNeuralNetwork	0.716402	0.788438	0.776653	0.432053	0.729691	0.707388	0.753445	0.678148
ColDataSmoteEqual1Erc	All data	DeepFullyConnectedNeuralNetwork_SGD_l1_dropoutFalse_numHiddenLayers1	DeepFullyConnectedNeuralNetwork	0.692304	0.760266	0.744542	0.38334	0.712954	0.677643	0.752147	0.630504
ColDataAugmentedDownsampledErc	All data	DecisionTreeC_max_depth-1_min_samples_split-9_RandomSearch	DecisionTreeC	0.682731	0.683062	0.618786	0.365877	0.701992	0.658973	0.75102	0.615105
ColDataAugmentedDownsampledErc	All data	KNC_metric-cosine_n_neighbors-62_p-1_GridSearch	KNC	0.724533	0.798674	0.774961	0.449178	0.729501	0.713228	0.746533	0.702746
ColDataSmoteEqual1Erc	All data	DecisionTreeC_max_depth-18_min_samples_split-6_RandomSearch	DecisionTreeC	0.750748	0.83124	0.832435	0.501525	0.752307	0.759699	0.745057	0.756626
ColDataSmoteEqual1Erc	All data	DeepFullyConnectedNeuralNetwork_Adagrad_l1_dropoutTrue_numHiddenLayers1	DeepFullyConnectedNeuralNetwork	0.720055	0.795079	0.784079	0.439592	0.729986	0.715698	0.744857	0.694442
AllDataAugmentedDownsampledErc	All data	DeepFullyConnectedNeuralNetwork_SGD_l1_dropoutTrue_numHiddenLayers5	DeepFullyConnectedNeuralNetwork	0.786976	0.887237	0.855363	0.574078	0.777836	0.815797	0.743252	0.831005
ColDataAugmentedDownsampledErc	All data	DeepFullyConnectedNeuralNetwork_Adagrad_l1_dropoutFalse_numHiddenLayers1	DeepFullyConnectedNeuralNetwork	0.711343	0.783037	0.760193	0.422823	0.717506	0.699245	0.736746	0.686187
DbSmoteEqual0Point5Erc	Partition data - db	DeepFullyConnectedNeuralNetwork_RMSprop_l1_dropoutFalse_numHiddenLayers12	DeepFullyConnectedNeuralNetwork	0.697992	0.757281	0.835038	0.359724	0.756644	0.780639	0.734081	0.633952
ColDataSmoteEqual1Erc	All data	DecisionTreeC_max_depth-1_min_samples_split-2_GridSearch	DecisionTreeC	0.69616	0.695576	0.640678	0.391547	0.709934	0.689269	0.731875	0.659276
ColDataImputedSmoteEqual0Point5Erc	All data	DeepFullyConnectedNeuralNetwork_RMSprop_l1_dropoutTrue_numHiddenLayers12	DeepFullyConnectedNeuralNetwork	0.703463	0.763836	0.557118	0.384728	0.619709	0.542198	0.723077	0.69362
AllDataSmoteEqual1Erc	All data	DeepFullyConnectedNeuralNetwork_Adagrad_l1_dropoutTrue_numHiddenLayers5	DeepFullyConnectedNeuralNetwork	0.78202	0.889109	0.848861	0.563881	0.766155	0.823686	0.716135	0.847545
ColDataSmoteEqual1Erc	All data	DeepFullyConnectedNeuralNetwork_SGD_l1_dropoutTrue_numHiddenLayers1	DeepFullyConnectedNeuralNetwork	0.716757	0.791647	0.781415	0.433615	0.717474	0.727301	0.707909	0.725895
ColDataImputedSmoteEqual0Point5Erc	All data	DeepFullyConnectedNeuralNetwork_RMSprop_l1_dropoutTrue_numHiddenLayers5	DeepFullyConnectedNeuralNetwork	0.722876	0.794207	0.663206	0.411276	0.628457	0.569246	0.701417	0.733645
ColDataSmoteEqual1Erc	All data	DeepFullyConnectedNeuralNetwork_RMSprop_l1_dropoutFalse_numHiddenLayers5	DeepFullyConnectedNeuralNetwork	0.710416	0.782681	0.769943	0.420978	0.71046	0.721959	0.699321	0.721873
COLAugmentedpositivesx2	All data	DeepFullyConnectedNeuralNetwork_Adagrad_l1_dropoutTrue_numHiddenLayers12	DeepFullyConnectedNeuralNetwork	0.735457	0.828327	0.919933	0.460458	0.779572	0.885689	0.696163	0.815947
nodiabeticosMerged	Partition data - ndb	DeepFullyConnectedNeuralNetwork_RMSprop_l1_dropoutTrue_numHiddenLayers5	DeepFullyConnectedNeuralNetwork	0.910964	0.932508	0.616536	0.53562	0.584235	0.508358	0.686738	0.933436
MergedImputed	All data	DeepFullyConnectedNeuralNetwork_Adagrad_l1_dropoutTrue_numHiddenLayers5	DeepFullyConnectedNeuralNetwork	0.887968	0.926903	0.646245	0.55686	0.621988	0.57034	0.683922	0.91975
ColDataSmoteEqual1Erc	All data	DeepFullyConnectedNeuralNetwork_RMSprop_l1_dropoutFalse_numHiddenLayers1	DeepFullyConnectedNeuralNetwork	0.71072	0.789939	0.776387	0.421983	0.704468	0.732328	0.67865	0.743838
nodiabeticosMerged	Partition data - ndb	DeepFullyConnectedNeuralNetwork_SGD_l1_dropoutFalse_numHiddenLayers5	DeepFullyConnectedNeuralNetwork	0.918473	0.934772	0.635143	0.557404	0.602199	0.542013	0.677419	0.942632
NdbSmoteEqual1Erc	Partition data - ndb	DeepFullyConnectedNeuralNetwork_RMSprop_l1_dropoutFalse_numHiddenLayers1	DeepFullyConnectedNeuralNetwork	0.816168	0.920077	0.850515	0.603863	0.745298	0.831025	0.675604	0.90914
ColDataAugmentedDownsampledErc	All data	DeepFullyConnectedNeuralNetwork_RMSprop_l1_dropoutTrue_numHiddenLayers1	DeepFullyConnectedNeuralNetwork	0.678774	0.744997	0.710938	0.357488	0.674815	0.679843	0.669861	0.687601
ColDataAugmentedDownsampledErc	All data	DeepFullyConnectedNeuralNetwork_RMSprop_l1_dropoutFalse_numHiddenLayers5	DeepFullyConnectedNeuralNetwork	0.706169	0.780414	0.761506	0.412083	0.691718	0.723608	0.66252	0.749394
MergedColombiaImputedUpsampledDownsampled	All data	DeepFullyConnectedNeuralNetwork_RMSprop_l1_dropoutTrue_numHiddenLayers12	DeepFullyConnectedNeuralNetwork	0.728208	0.781713	0.627338	0.407042	0.616135	0.579757	0.657385	0.763376
NdbSmoteEqual1Erc	Partition data - ndb	DeepFullyConnectedNeuralNetwork_Adagrad_l1_dropoutTrue_numHiddenLayers5	DeepFullyConnectedNeuralNetwork	0.803676	0.910273	0.825781	0.576505	0.727098	0.814016	0.65695	0.900723
MergedColombiaImputed	All data	DeepFullyConnectedNeuralNetwork_RMSprop_l1_dropoutTrue_numHiddenLayers12	DeepFullyConnectedNeuralNetwork	0.715052	0.760735	0.54874	0.380219	0.599332	0.556955	0.648688	0.747523
MergedImputed	All data	DeepFullyConnectedNeuralNetwork_RMSprop_l1_dropoutFalse_numHiddenLayers5	DeepFullyConnectedNeuralNetwork	0.872975	0.913006	0.54161	0.504607	0.578407	0.523246	0.646569	0.90824
AllDataSmoteEqual1Erc	All data	DeepFullyConnectedNeuralNetwork_RMSprop_l1_dropoutFalse_numHiddenLayers12	DeepFullyConnectedNeuralNetwork	0.779441	0.904823	0.884779	0.558556	0.744735	0.880494	0.645248	0.912901
MergedColombiaImputed	All data	DeepFullyConnectedNeuralNetwork_RMSprop_l1_dropoutTrue_numHiddenLayers5	DeepFullyConnectedNeuralNetwork	0.733044	0.789743	0.647643	0.409818	0.61284	0.585292	0.643108	0.777048
DiabeticosImputadoMerged	Partition data - db	DeepFullyConnectedNeuralNetwork_RMSprop_l1_dropoutFalse_numHiddenLayers12	DeepFullyConnectedNeuralNetwork	0.709607	0.772407	0.638686	0.382617	0.615213	0.591652	0.640727	0.748742
MergedColombiaImputedUpsampledDownsampled	All data	DeepFullyConnectedNeuralNetwork_SGD_l1_dropoutFalse_numHiddenLayers12	DeepFullyConnectedNeuralNetwork	0.741142	0.798913	0.654599	0.423188	0.619059	0.604898	0.633898	0.794397
AllDataSmoteEqual0Point5Erc	All data	DeepFullyConnectedNeuralNetwork_RMSprop_l1_dropoutTrue_numHiddenLayers1	DeepFullyConnectedNeuralNetwork	0.794507	0.889139	0.735389	0.521355	0.66918	0.723348	0.622559	0.880676
ColDataSmoteEqual1Erc	All data	KNC_metric-cityblock_n_neighbors-2_p-1_GridSearch	KNC	0.725077	0.792489	0.733322	0.451962	0.696398	0.793235	0.620631	0.832938
DiabeticosImputadoMerged	Partition data - db	DeepFullyConnectedNeuralNetwork_Adagrad_l1_dropoutTrue_numHiddenLayers5	DeepFullyConnectedNeuralNetwork	0.718386	0.778513	0.655364	0.389946	0.610462	0.611891	0.60904	0.780514
ColDataSmoteEqual1Erc	All data	DeepFullyConnectedNeuralNetwork_SGD_l1_dropoutTrue_numHiddenLayers5	DeepFullyConnectedNeuralNetwork	0.634113	0.684875	0.669756	0.268786	0.628247	0.649265	0.608548	0.660514
ColDataSmoteEqual1Erc	All data	DeepFullyConnectedNeuralNetwork_RMSprop_l1_dropoutTrue_numHiddenLayers1	DeepFullyConnectedNeuralNetwork	0.700624	0.785995	0.776906	0.403006	0.673346	0.755434	0.60735	0.796948
DiabeticosImputadoMerged	Partition data - db	DeepFullyConnectedNeuralNetwork_Adagrad_l1_dropoutFalse_numHiddenLayers12	DeepFullyConnectedNeuralNetwork	0.720074	0.779214	0.649753	0.391889	0.610249	0.61575	0.604846	0.785544
MergedColombiaImputedUpsampledDownsampled	All data	DeepFullyConnectedNeuralNetwork_RMSprop_l1_dropoutFalse_numHiddenLayers5	DeepFullyConnectedNeuralNetwork	0.742589	0.797426	0.655167	0.417002	0.608791	0.614039	0.603632	0.811591
ColDataImputedSmoteEqual0Point5Erc	All data	DeepFullyConnectedNeuralNetwork_Adagrad_l1_dropoutTrue_numHiddenLayers5	DeepFullyConnectedNeuralNetwork	0.747294	0.80763	0.677053	0.4262	0.61389	0.627111	0.601215	0.820601
MergedColombiaImputedUpsampledDownsampled	All data	DeepFullyConnectedNeuralNetwork_RMSprop_l1_dropoutTrue_numHiddenLayers1	DeepFullyConnectedNeuralNetwork	0.741866	0.793676	0.6515	0.414396	0.606395	0.613687	0.599274	0.812673
MergedImputedUpsampled	All data	DecisionTreeC_max_depth-29_min_samples_split-6_RandomSearch	DecisionTreeC	0.881385	0.832252	0.566462	0.561355	0.631766	0.670648	0.597145	0.939767
MergedImputed	All data	DeepFullyConnectedNeuralNetwork_Adagrad_l1_dropoutFalse_numHiddenLayers1	DeepFullyConnectedNeuralNetwork	0.896175	0.929517	0.654077	0.544855	0.604564	0.621066	0.588916	0.944033
DiabeticosImputadoMerged	Partition data - db	DeepFullyConnectedNeuralNetwork_RMSprop_l1_dropoutTrue_numHiddenLayers5	DeepFullyConnectedNeuralNetwork	0.704035	0.76105	0.632766	0.35685	0.587626	0.593349	0.582013	0.773365
DiabeticosImputadoMerged	Partition data - db	DeepFullyConnectedNeuralNetwork_Adagrad_l1_dropoutFalse_numHiddenLayers5	DeepFullyConnectedNeuralNetwork	0.719399	0.778518	0.654272	0.384453	0.600289	0.620278	0.581547	0.797723
ColDataSmoteEqual1Erc	All data	DeepFullyConnectedNeuralNetwork_SGD_l1_dropoutFalse_numHiddenLayers5	DeepFullyConnectedNeuralNetwork	0.682157	0.762476	0.752084	0.36636	0.649824	0.737971	0.580487	0.787151
DiabeticosImputadoMerged	Partition data - db	DeepFullyConnectedNeuralNetwork_SGD_l1_dropoutFalse_numHiddenLayers1	DeepFullyConnectedNeuralNetwork	0.721256	0.781342	0.659801	0.38734	0.601111	0.624185	0.579683	0.801694
NdbSmoteEqual1Erc	Partition data - ndb	DeepFullyConnectedNeuralNetwork_RMSprop_l1_dropoutTrue_numHiddenLayers1	DeepFullyConnectedNeuralNetwork	0.788305	0.91702	0.842269	0.533399	0.684459	0.841667	0.576735	0.92824
DiabeticosImputadoMerged	Partition data - db	DecisionTreeC_max_depth-5_min_samples_split-2_GridSearch	DecisionTreeC	0.731386	0.778208	0.638943	0.404371	0.607451	0.645517	0.573625	0.821022
ColDataImputedSmoteEqual0Point5Erc	All data	DeepFullyConnectedNeuralNetwork_SGD_l1_dropoutFalse_numHiddenLayers1	DeepFullyConnectedNeuralNetwork	0.753314	0.809044	0.677314	0.428841	0.607723	0.648382	0.571862	0.844372
ColDataImputedSmoteEqual0Point5Erc	All data	DeepFullyConnectedNeuralNetwork_RMSprop_l1_dropoutFalse_numHiddenLayers12	DeepFullyConnectedNeuralNetwork	0.743777	0.795717	0.640004	0.410464	0.597791	0.628629	0.569838	0.831065
ColDataImputedSmoteEqual0Point5Erc	All data	DeepFullyConnectedNeuralNetwork_Adagrad_l1_dropoutFalse_numHiddenLayers1	DeepFullyConnectedNeuralNetwork	0.751218	0.809075	0.678476	0.424076	0.604516	0.644725	0.569028	0.842645
ColDataImputedSmoteEqual0Point5Erc	All data	DeepFullyConnectedNeuralNetwork_Adagrad_l1_dropoutTrue_numHiddenLayers1	DeepFullyConnectedNeuralNetwork	0.753247	0.80885	0.678291	0.427107	0.605366	0.650093	0.566397	0.847013
ColDataImputedSmoteEqual0Point5Erc	All data	DeepFullyConnectedNeuralNetwork_SGD_l1_dropoutTrue_numHiddenLayers1	DeepFullyConnectedNeuralNetwork	0.751623	0.808085	0.678041	0.423638	0.603199	0.646963	0.56498	0.845286
MergedColombiaImputed	All data	DeepFullyConnectedNeuralNetwork_SGD_l1_dropoutTrue_numHiddenLayers1	DeepFullyConnectedNeuralNetwork	0.746283	0.80317	0.659884	0.40977	0.593407	0.626608	0.563546	0.835693
MergedColombiaImputed	All data	DeepFullyConnectedNeuralNetwork_Adagrad_l1_dropoutTrue_numHiddenLayers1	DeepFullyConnectedNeuralNetwork	0.74832	0.803626	0.660239	0.4133	0.594996	0.631201	0.56272	0.83913
MergedImputed	All data	DeepFullyConnectedNeuralNetwork_Adagrad_l1_dropoutTrue_numHiddenLayers1	DeepFullyConnectedNeuralNetwork	0.896476	0.928993	0.651237	0.535055	0.594166	0.629832	0.562322	0.948523
ColDataImputedSmoteEqual0Point5Erc	All data	DeepFullyConnectedNeuralNetwork_Adagrad_l1_dropoutFalse_numHiddenLayers5	DeepFullyConnectedNeuralNetwork	0.752503	0.806293	0.673628	0.42439	0.602758	0.649965	0.561943	0.848131
MergedColombiaImputedUpsampledDownsampled	All data	DecisionTreeC_max_depth-7_min_samples_split-10_RandomSearch	DecisionTreeC	0.753113	0.804594	0.660936	0.423658	0.601065	0.647915	0.560533	0.848744
MergedImputed	All data	DeepFullyConnectedNeuralNetwork_Adagrad_l1_dropoutFalse_numHiddenLayers5	DeepFullyConnectedNeuralNetwork	0.892509	0.925867	0.626245	0.522679	0.584277	0.610166	0.560495	0.944223
DiabeticosImputadoMerged	Partition data - db	DeepFullyConnectedNeuralNetwork_RMSprop_l1_dropoutFalse_numHiddenLayers5	DeepFullyConnectedNeuralNetwork	0.721931	0.778292	0.649108	0.383279	0.593434	0.630971	0.560112	0.813873
DiabeticosImputadoMerged	Partition data - db	DeepFullyConnectedNeuralNetwork_Adagrad_l1_dropoutTrue_numHiddenLayers1	DeepFullyConnectedNeuralNetwork	0.720581	0.776718	0.654943	0.380539	0.591862	0.628601	0.55918	0.812285
MergedImputed	All data	DeepFullyConnectedNeuralNetwork_SGD_l1_dropoutFalse_numHiddenLayers5	DeepFullyConnectedNeuralNetwork	0.890704	0.924299	0.614134	0.516805	0.579518	0.601749	0.558871	0.942389
MergedColombiaImputed	All data	DecisionTreeC_max_depth-6_min_samples_split-16_RandomSearch	DecisionTreeC	0.755788	0.807455	0.657832	0.425974	0.600378	0.649207	0.55838	0.852376
ColDataImputedSmoteEqual0Point5Erc	All data	DeepFullyConnectedNeuralNetwork_RMSprop_l1_dropoutFalse_numHiddenLayers5	DeepFullyConnectedNeuralNetwork	0.750338	0.806809	0.67392	0.418871	0.598586	0.646769	0.557085	0.847318
DiabeticosImputadoMerged	Partition data - db	DeepFullyConnectedNeuralNetwork_SGD_l1_dropoutTrue_numHiddenLayers1	DeepFullyConnectedNeuralNetwork	0.721087	0.778057	0.658984	0.380704	0.591089	0.630412	0.556384	0.814668
DiabeticosImputadoMerged	Partition data - db	DeepFullyConnectedNeuralNetwork_SGD_l1_dropoutFalse_numHiddenLayers5	DeepFullyConnectedNeuralNetwork	0.719905	0.77722	0.65337	0.378401	0.589864	0.628225	0.555918	0.813079
MergedImputedUpsampled	All data	DeepFullyConnectedNeuralNetwork_SGD_l1_dropoutTrue_numHiddenLayers1	DeepFullyConnectedNeuralNetwork	0.848507	0.87739	0.58327	0.464125	0.555428	0.555481	0.555375	0.908715
MergedColombiaImputed	All data	DeepFullyConnectedNeuralNetwork_Adagrad_l1_dropoutFalse_numHiddenLayers1	DeepFullyConnectedNeuralNetwork	0.74703	0.804048	0.65906	0.408528	0.590459	0.630664	0.555073	0.84095
DbSmoteEqual0Point5Erc	Partition data - db	DeepFullyConnectedNeuralNetwork_RMSprop_l1_dropoutTrue_numHiddenLayers5	DeepFullyConnectedNeuralNetwork	0.645889	0.761382	0.840519	0.321962	0.665885	0.839627	0.551719	0.812997
mergedColombiaImputedUpsampled	All data	DeepFullyConnectedNeuralNetwork_SGD_l1_dropoutTrue_numHiddenLayers5	DeepFullyConnectedNeuralNetwork	0.756439	0.803156	0.643071	0.414402	0.585907	0.626201	0.550485	0.850278
MergedColombiaImputed	All data	DeepFullyConnectedNeuralNetwork_Adagrad_l1_dropoutFalse_numHiddenLayers12	DeepFullyConnectedNeuralNetwork	0.749678	0.804108	0.65761	0.410967	0.589467	0.639063	0.547014	0.848837
MergedColombiaImputed	All data	DeepFullyConnectedNeuralNetwork_Adagrad_l1_dropoutFalse_numHiddenLayers5	DeepFullyConnectedNeuralNetwork	0.748388	0.802841	0.658379	0.408029	0.587489	0.636671	0.545361	0.847725
MergedColombiaImputed	All data	DeepFullyConnectedNeuralNetwork_SGD_l1_dropoutFalse_numHiddenLayers1	DeepFullyConnectedNeuralNetwork	0.749202	0.804049	0.658395	0.409558	0.588275	0.638519	0.545361	0.848938
MergedImputed	All data	DeepFullyConnectedNeuralNetwork_SGD_l1_dropoutFalse_numHiddenLayers1	DeepFullyConnectedNeuralNetwork	0.897844	0.927341	0.650522	0.531441	0.589309	0.643063	0.543849	0.952982
MergedColombiaImputed	All data	DeepFullyConnectedNeuralNetwork_Adagrad_l1_dropoutTrue_numHiddenLayers5	DeepFullyConnectedNeuralNetwork	0.748727	0.802108	0.65904	0.408082	0.586988	0.63804	0.543501	0.849141
ColDataImputedSmoteEqual0Point5Erc	All data	DeepFullyConnectedNeuralNetwork_SGD_l1_dropoutFalse_numHiddenLayers5	DeepFullyConnectedNeuralNetwork	0.750203	0.804619	0.671619	0.414458	0.592429	0.651298	0.54332	0.854023
MergedImputedUpsampledDownsampled	All data	DeepFullyConnectedNeuralNetwork_Adagrad_l1_dropoutTrue_numHiddenLayers5	DeepFullyConnectedNeuralNetwork	0.847315	0.880784	0.589963	0.462048	0.55411	0.566337	0.5424	0.911953
AllDataSmoteEqual0Point5Erc	All data	DeepFullyConnectedNeuralNetwork_RMSprop_l1_dropoutTrue_numHiddenLayers5	DeepFullyConnectedNeuralNetwork	0.797987	0.903055	0.77739	0.507702	0.641858	0.78631	0.542243	0.926151
MergedColombiaImputedUpsampledDownsampled	All data	DeepFullyConnectedNeuralNetwork_Adagrad_l1_dropoutTrue_numHiddenLayers5	DeepFullyConnectedNeuralNetwork	0.745642	0.798208	0.657349	0.403771	0.585494	0.6374	0.541404	0.84706
DiabeticosImputadoMerged	Partition data - db	DeepFullyConnectedNeuralNetwork_RMSprop_l1_dropoutFalse_numHiddenLayers1	DeepFullyConnectedNeuralNetwork	0.718217	0.777325	0.657136	0.370889	0.58139	0.629549	0.540075	0.819433
MergedImputedUpsampledDownsampled	All data	DecisionTreeC_max_depth-43_min_samples_split-12_RandomSearch	DecisionTreeC	0.868094	0.868087	0.619728	0.510549	0.588295	0.647804	0.5388	0.937901
nodiabeticosMerged	Partition data - ndb	DeepFullyConnectedNeuralNetwork_Adagrad_l1_dropoutFalse_numHiddenLayers12	DeepFullyConnectedNeuralNetwork	0.930064	0.941578	0.633617	0.543978	0.581804	0.638937	0.53405	0.969754
DiabeticosImputadoMerged	Partition data - db	DeepFullyConnectedNeuralNetwork_SGD_l1_dropoutFalse_numHiddenLayers12	DeepFullyConnectedNeuralNetwork	0.7221	0.778918	0.655029	0.376387	0.582021	0.639509	0.534017	0.828965
ColDataImputedSmoteEqual0Point5Erc	All data	DecisionTreeC_max_depth-7_min_samples_split-17_RandomSearch	DecisionTreeC	0.756358	0.813132	0.67543	0.422784	0.593454	0.670663	0.532186	0.868854
MergedImputedUpsampled	All data	DeepFullyConnectedNeuralNetwork_RMSprop_l1_dropoutFalse_numHiddenLayers1	DeepFullyConnectedNeuralNetwork	0.849405	0.876508	0.579602	0.454786	0.544916	0.56168	0.529124	0.915189
MergedColombiaImputedUpsampledDownsampled	All data	DeepFullyConnectedNeuralNetwork_Adagrad_l1_dropoutTrue_numHiddenLayers1	DeepFullyConnectedNeuralNetwork	0.749096	0.798865	0.658677	0.405885	0.582431	0.650343	0.527361	0.859204
mergedColombiaImputedUpsampled	All data	DeepFullyConnectedNeuralNetwork_SGD_l1_dropoutFalse_numHiddenLayers1	DeepFullyConnectedNeuralNetwork	0.756945	0.802001	0.643981	0.407317	0.575525	0.634749	0.52641	0.861984
DiabeticosImputadoMerged	Partition data - db	DeepFullyConnectedNeuralNetwork_Adagrad_l1_dropoutFalse_numHiddenLayers1	DeepFullyConnectedNeuralNetwork	0.718048	0.779244	0.654841	0.366501	0.574631	0.633708	0.525629	0.827376
MergedColombiaImputed	All data	DeepFullyConnectedNeuralNetwork_RMSprop_l1_dropoutFalse_numHiddenLayers1	DeepFullyConnectedNeuralNetwork	0.75219	0.803368	0.65857	0.408945	0.582189	0.652553	0.525522	0.863094
mergedColombiaImputedUpsampled	All data	DeepFullyConnectedNeuralNetwork_RMSprop_l1_dropoutTrue_numHiddenLayers1	DeepFullyConnectedNeuralNetwork	0.755933	0.800189	0.640818	0.40491	0.573841	0.632741	0.524973	0.861166
MergedImputed	All data	DeepFullyConnectedNeuralNetwork_SGD_l1_dropoutTrue_numHiddenLayers1	DeepFullyConnectedNeuralNetwork	0.898501	0.928695	0.653618	0.52505	0.582019	0.653924	0.524361	0.956776
ColDataImputedSmoteEqual0Point5Erc	All data	DeepFullyConnectedNeuralNetwork_SGD_l1_dropoutTrue_numHiddenLayers5	DeepFullyConnectedNeuralNetwork	0.754261	0.807639	0.674168	0.416172	0.587487	0.668994	0.523684	0.869972
MergedColombiaImputedUpsampledDownsampled	All data	DeepFullyConnectedNeuralNetwork_RMSprop_l1_dropoutFalse_numHiddenLayers1	DeepFullyConnectedNeuralNetwork	0.746766	0.798134	0.656638	0.400022	0.578046	0.646407	0.52276	0.858002
MergedImputed	All data	DecisionTreeC_max_depth-16_min_samples_split-5_RandomSearch	DecisionTreeC	0.895136	0.909373	0.620804	0.513714	0.57283	0.635038	0.521721	0.953298
DiabeticosImputadoMerged	Partition data - db	DeepFullyConnectedNeuralNetwork_RMSprop_l1_dropoutTrue_numHiddenLayers1	DeepFullyConnectedNeuralNetwork	0.716866	0.77457	0.653598	0.362581	0.57077	0.633163	0.519571	0.828965
nodiabeticosMerged	Partition data - ndb	DecisionTreeC_max_depth-5_min_samples_split-2_GridSearch	DecisionTreeC	0.93186	0.942611	0.638933	0.54483	0.581344	0.660137	0.519355	0.973202
nodiabeticosMerged	Partition data - ndb	DeepFullyConnectedNeuralNetwork_Adagrad_l1_dropoutTrue_numHiddenLayers1	DeepFullyConnectedNeuralNetwork	0.930815	0.944606	0.645293	0.539166	0.576285	0.651741	0.516487	0.97234
MergedColombiaImputedUpsampledDownsampled	All data	DeepFullyConnectedNeuralNetwork_Adagrad_l1_dropoutFalse_numHiddenLayers1	DeepFullyConnectedNeuralNetwork	0.749418	0.800643	0.659428	0.402901	0.577429	0.655491	0.515981	0.865336
ColDataImputedSmoteEqual0Point5Erc	All data	DeepFullyConnectedNeuralNetwork_RMSprop_l1_dropoutFalse_numHiddenLayers1	DeepFullyConnectedNeuralNetwork	0.753314	0.807217	0.674167	0.411349	0.582006	0.670806	0.513968	0.873425
mergedColombiaImputedUpsampled	All data	DecisionTreeC_max_depth-8_min_samples_split-18_RandomSearch	DecisionTreeC	0.7624	0.812422	0.651636	0.413368	0.574992	0.653257	0.513475	0.875819
MergedColombiaImputedUpsampledDownsampled	All data	DeepFullyConnectedNeuralNetwork_SGD_l1_dropoutTrue_numHiddenLayers1	DeepFullyConnectedNeuralNetwork	0.749578	0.798483	0.657396	0.402283	0.576207	0.657054	0.513075	0.867019
MergedImputedUpsampledDownsampled	All data	DeepFullyConnectedNeuralNetwork_Adagrad_l1_dropoutTrue_numHiddenLayers1	DeepFullyConnectedNeuralNetwork	0.84925	0.880692	0.591675	0.452277	0.54208	0.578295	0.510133	0.92114
MergedImputed	All data	DeepFullyConnectedNeuralNetwork_Adagrad_l1_dropoutFalse_numHiddenLayers12	DeepFullyConnectedNeuralNetwork	0.89623	0.925244	0.64596	0.51127	0.56932	0.645968	0.508932	0.956555
MergedColombiaImputedUpsampledDownsampled	All data	DeepFullyConnectedNeuralNetwork_SGD_l1_dropoutTrue_numHiddenLayers5	DeepFullyConnectedNeuralNetwork	0.747971	0.798141	0.655527	0.397827	0.572558	0.654721	0.508717	0.866779
mergedColombiaImputedUpsampled	All data	DeepFullyConnectedNeuralNetwork_SGD_l1_dropoutTrue_numHiddenLayers1	DeepFullyConnectedNeuralNetwork	0.759363	0.802607	0.646191	0.404448	0.567559	0.648649	0.504492	0.875491
ColDataSmoteEqual1Erc	All data	DeepFullyConnectedNeuralNetwork_RMSprop_l1_dropoutFalse_numHiddenLayers12	DeepFullyConnectedNeuralNetwork	0.680686	0.785229	0.774171	0.364971	0.616126	0.791445	0.504394	0.862741
MergedImputedUpsampled	All data	DeepFullyConnectedNeuralNetwork_SGD_l1_dropoutFalse_numHiddenLayers1	DeepFullyConnectedNeuralNetwork	0.852866	0.877214	0.581826	0.45093	0.537913	0.578582	0.502587	0.924812
DiabeticosImputadoMerged	Partition data - db	KNC_metric-cosine_n_neighbors-84_p-999.7491581800289_RandomSearch	KNC	0.725646	0.782045	0.648146	0.373693	0.569536	0.659914	0.500932	0.853323
ColDataAugmentedDownsampledErc	All data	DeepFullyConnectedNeuralNetwork_RMSprop_l1_dropoutFalse_numHiddenLayers1	DeepFullyConnectedNeuralNetwork	0.670252	0.755473	0.743195	0.339404	0.601129	0.754932	0.499388	0.839459
ColDataImputedSmoteEqual0Point5Erc	All data	DeepFullyConnectedNeuralNetwork_RMSprop_l1_dropoutTrue_numHiddenLayers1	DeepFullyConnectedNeuralNetwork	0.753044	0.805279	0.673414	0.406189	0.574624	0.676915	0.49919	0.880435
nodiabeticosMerged	Partition data - ndb	DeepFullyConnectedNeuralNetwork_RMSprop_l1_dropoutFalse_numHiddenLayers12	DeepFullyConnectedNeuralNetwork	0.926081	0.918811	0.603981	0.511541	0.551328	0.616578	0.498566	0.968927
nodiabeticosMerged	Partition data - ndb	DecisionTreeC_max_depth-8_min_samples_split-10_RandomSearch	DecisionTreeC	0.932023	0.942392	0.638754	0.535227	0.571252	0.671346	0.497133	0.975609
nodiabeticosMerged	Partition data - ndb	DeepFullyConnectedNeuralNetwork_SGD_l1_dropoutFalse_numHiddenLayers1	DeepFullyConnectedNeuralNetwork	0.931664	0.94452	0.649058	0.533538	0.569784	0.667952	0.496774	0.97525
DiabeticosImputadoMerged	Partition data - db	KNC_metric-cosine_n_neighbors-62_p-1_GridSearch	KNC	0.727165	0.782184	0.64721	0.375239	0.568607	0.665625	0.496272	0.858353
ColDataImputedSmoteEqual0Point5Erc	All data	KNC_metric-cityblock_n_neighbors-78_p-2017.192023353962_RandomSearch	KNC	0.753653	0.807628	0.674791	0.40589	0.572936	0.680881	0.494534	0.883685
MergedColombiaImputedUpsampledDownsampled	All data	KNC_metric-euclidean_n_neighbors-73_p-4494.506741382034_RandomSearch	KNC	0.751024	0.801587	0.655259	0.398911	0.568324	0.669072	0.493947	0.878682
ColDataImputedSmoteEqual0Point5Erc	All data	KNC_metric-cityblock_n_neighbors-62_p-1_GridSearch	KNC	0.752773	0.807003	0.671858	0.40322	0.570556	0.679922	0.491498	0.883889
AllDataSmoteEqual0Point5Erc	All data	DeepFullyConnectedNeuralNetwork_SGD_l1_dropoutFalse_numHiddenLayers12	DeepFullyConnectedNeuralNetwork	0.762568	0.873785	0.714953	0.422007	0.580053	0.708181	0.491185	0.898569
MergedColombiaImputed	All data	DeepFullyConnectedNeuralNetwork_RMSprop_l1_dropoutTrue_numHiddenLayers1	DeepFullyConnectedNeuralNetwork	0.749542	0.802119	0.657855	0.391994	0.561929	0.660525	0.488944	0.877048
MergedColombiaImputedUpsampledDownsampled	All data	DeepFullyConnectedNeuralNetwork_Adagrad_l1_dropoutFalse_numHiddenLayers12	DeepFullyConnectedNeuralNetwork	0.745963	0.796755	0.647504	0.386411	0.559119	0.659106	0.485472	0.875316
MergedColombiaImputed	All data	DeepFullyConnectedNeuralNetwork_RMSprop_l1_dropoutFalse_numHiddenLayers5	DeepFullyConnectedNeuralNetwork	0.750017	0.800861	0.657771	0.3916	0.560411	0.663557	0.485018	0.879676
MergedColombiaImputed	All data	KNC_metric-cityblock_n_neighbors-82_p-1_GridSearch	KNC	0.75056	0.803312	0.65717	0.392095	0.560105	0.665813	0.483364	0.881294
MergedColombiaImputedUpsampledDownsampled	All data	DeepFullyConnectedNeuralNetwork_SGD_l1_dropoutFalse_numHiddenLayers1	DeepFullyConnectedNeuralNetwork	0.750301	0.799031	0.656762	0.393962	0.56213	0.67217	0.483051	0.883011
ColDataImputedSmoteEqual0Point5Erc	All data	DeepFullyConnectedNeuralNetwork_Adagrad_l1_dropoutFalse_numHiddenLayers12	DeepFullyConnectedNeuralNetwork	0.753517	0.807844	0.671747	0.401483	0.566294	0.687175	0.481579	0.889984
MergedColombiaImputed	All data	KNC_metric-cityblock_n_neighbors-96_p-9218.742350231169_RandomSearch	KNC	0.751918	0.803838	0.658409	0.394098	0.5605	0.670504	0.481504	0.884226
mergedColombiaImputedUpsampled	All data	DeepFullyConnectedNeuralNetwork_SGD_l1_dropoutFalse_numHiddenLayers5	DeepFullyConnectedNeuralNetwork	0.756889	0.803596	0.643735	0.39052	0.551974	0.652217	0.478441	0.883759
MergedColombiaImputedUpsampledDownsampled	All data	KNC_metric-cityblock_n_neighbors-62_p-1_GridSearch	KNC	0.750783	0.801213	0.654803	0.392982	0.559625	0.67639	0.47724	0.886618
NdbSmoteEqual1Erc	Partition data - ndb	DeepFullyConnectedNeuralNetwork_SGD_l1_dropoutTrue_numHiddenLayers5	DeepFullyConnectedNeuralNetwork	0.75111	0.898997	0.792088	0.440635	0.603668	0.824543	0.476126	0.932988
nodiabeticosMerged	Partition data - ndb	DeepFullyConnectedNeuralNetwork_Adagrad_l1_dropoutFalse_numHiddenLayers1	DeepFullyConnectedNeuralNetwork	0.932056	0.945188	0.65253	0.524246	0.559763	0.683015	0.474194	0.977944
MergedImputed	All data	DecisionTreeC_max_depth-2_min_samples_split-2_GridSearch	DecisionTreeC	0.889527	0.893981	0.501596	0.473508	0.5349	0.618211	0.471376	0.954658
DiabeticosImputadoMerged	Partition data - db	SVC_C-0.1_kernel-linear_gamma-scale_GridSearch	SVC	0.719905	0.773019	0.652386	0.353729	0.548571	0.659254	0.469711	0.86206
mergedColombiaImputedUpsampled	All data	DeepFullyConnectedNeuralNetwork_Adagrad_l1_dropoutFalse_numHiddenLayers5	DeepFullyConnectedNeuralNetwork	0.758632	0.805179	0.646667	0.390164	0.548306	0.661839	0.46802	0.891045
mergedColombiaImputedUpsampled	All data	DeepFullyConnectedNeuralNetwork_Adagrad_l1_dropoutTrue_numHiddenLayers1	DeepFullyConnectedNeuralNetwork	0.761107	0.805303	0.648211	0.394873	0.550666	0.669496	0.467661	0.89481
mergedColombiaImputedUpsampled	All data	DeepFullyConnectedNeuralNetwork_Adagrad_l1_dropoutFalse_numHiddenLayers1	DeepFullyConnectedNeuralNetwork	0.758801	0.804201	0.646408	0.390299	0.548193	0.662592	0.467481	0.891536
MergedColombiaImputed	All data	DeepFullyConnectedNeuralNetwork_SGD_l1_dropoutFalse_numHiddenLayers12	DeepFullyConnectedNeuralNetwork	0.748591	0.797689	0.653285	0.382779	0.549678	0.667849	0.467039	0.88635
DiabeticosImputadoMerged	Partition data - db	DeepFullyConnectedNeuralNetwork_SGD_l1_dropoutTrue_numHiddenLayers5	DeepFullyConnectedNeuralNetwork	0.724802	0.777438	0.658586	0.362222	0.551458	0.673387	0.466915	0.871326
MergedColombiaImputedUpsampledDownsampled	All data	DeepFullyConnectedNeuralNetwork_SGD_l1_dropoutFalse_numHiddenLayers5	DeepFullyConnectedNeuralNetwork	0.745722	0.79738	0.654573	0.379224	0.548438	0.667593	0.465375	0.884934
MergedColombiaImputed	All data	DecisionTreeC_max_depth-5_min_samples_split-2_GridSearch	DecisionTreeC	0.749338	0.799364	0.644594	0.383025	0.548545	0.671758	0.463526	0.889181
mergedColombiaImputedUpsampled	All data	DeepFullyConnectedNeuralNetwork_RMSprop_l1_dropoutFalse_numHiddenLayers5	DeepFullyConnectedNeuralNetwork	0.759307	0.804164	0.644555	0.389273	0.545744	0.666753	0.461912	0.89481
nodiabeticosMerged	Partition data - ndb	DeepFullyConnectedNeuralNetwork_Adagrad_l1_dropoutFalse_numHiddenLayers5	DeepFullyConnectedNeuralNetwork	0.93088	0.936144	0.634247	0.509225	0.545025	0.680623	0.45448	0.978626
MergedColombiaImputedUpsampledDownsampled	All data	DeepFullyConnectedNeuralNetwork_Adagrad_l1_dropoutFalse_numHiddenLayers5	DeepFullyConnectedNeuralNetwork	0.745642	0.796411	0.652947	0.375111	0.542089	0.673132	0.453753	0.890586
mergedColombiaImputedUpsampled	All data	DeepFullyConnectedNeuralNetwork_Adagrad_l1_dropoutFalse_numHiddenLayers12	DeepFullyConnectedNeuralNetwork	0.756889	0.803719	0.643593	0.380526	0.537301	0.664549	0.450952	0.896284
MergedColombiaImputed	All data	DeepFullyConnectedNeuralNetwork_SGD_l1_dropoutFalse_numHiddenLayers5	DeepFullyConnectedNeuralNetwork	0.750085	0.801061	0.657427	0.379781	0.541879	0.681164	0.449886	0.896967
mergedColombiaImputedUpsampled	All data	KNC_metric-cityblock_n_neighbors-42_p-1_GridSearch	KNC	0.761782	0.807715	0.643681	0.389426	0.541261	0.681298	0.448976	0.904306
MergedColombiaImputedUpsampledDownsampled	All data	DecisionTreeC_max_depth-5_min_samples_split-2_GridSearch	DecisionTreeC	0.745159	0.793533	0.638388	0.37251	0.538953	0.674182	0.44891	0.892269
mergedColombiaImputedUpsampled	All data	KNC_metric-euclidean_n_neighbors-50_p-5247.746602583891_RandomSearch	KNC	0.758632	0.806787	0.642858	0.383084	0.537799	0.671237	0.448617	0.899885
MergedImputedUpsampledDownsampled	All data	DeepFullyConnectedNeuralNetwork_Adagrad_l1_dropoutFalse_numHiddenLayers1	DeepFullyConnectedNeuralNetwork	0.855337	0.881559	0.593551	0.437483	0.520077	0.619539	0.448133	0.94166
AllDataSmoteEqual0Point5Erc	All data	DeepFullyConnectedNeuralNetwork_RMSprop_l1_dropoutFalse_numHiddenLayers12	DeepFullyConnectedNeuralNetwork	0.780288	0.911115	0.796711	0.443214	0.574776	0.812067	0.444803	0.948413
MergedImputedUpsampledDownsampled	All data	DeepFullyConnectedNeuralNetwork_RMSprop_l1_dropoutFalse_numHiddenLayers1	DeepFullyConnectedNeuralNetwork	0.853775	0.88092	0.590855	0.431775	0.515306	0.613135	0.4444	0.940558
mergedColombiaImputedUpsampled	All data	DecisionTreeC_max_depth-5_min_samples_split-2_GridSearch	DecisionTreeC	0.757395	0.798668	0.628213	0.378317	0.533016	0.670479	0.442328	0.90095
MergedColombiaImputed	All data	DeepFullyConnectedNeuralNetwork_RMSprop_l1_dropoutFalse_numHiddenLayers12	DeepFullyConnectedNeuralNetwork	0.748523	0.801408	0.657521	0.373408	0.535024	0.681484	0.44038	0.899292
nodiabeticosMerged	Partition data - ndb	DeepFullyConnectedNeuralNetwork_Adagrad_l1_dropoutTrue_numHiddenLayers5	DeepFullyConnectedNeuralNetwork	0.930815	0.941515	0.633472	0.501004	0.536425	0.688377	0.439427	0.980063
nodiabeticosMerged	Partition data - ndb	KNC_metric-nan_euclidean_n_neighbors-22_p-1_GridSearch	KNC	0.930978	0.931632	0.615288	0.501509	0.53681	0.69053	0.439068	0.980279
ColDataImputedSmoteEqual0Point5Erc	All data	DeepFullyConnectedNeuralNetwork_SGD_l1_dropoutFalse_numHiddenLayers12	DeepFullyConnectedNeuralNetwork	0.752367	0.800705	0.656548	0.384917	0.54186	0.709603	0.438259	0.909996
ColDataImputedSmoteEqual0Point5Erc	All data	DecisionTreeC_max_depth-5_min_samples_split-2_GridSearch	DecisionTreeC	0.752706	0.804801	0.659409	0.385518	0.542084	0.710907	0.438057	0.910605
mergedColombiaImputedUpsampled	All data	DeepFullyConnectedNeuralNetwork_Adagrad_l1_dropoutTrue_numHiddenLayers5	DeepFullyConnectedNeuralNetwork	0.75852	0.804418	0.643402	0.376969	0.528753	0.679357	0.432806	0.906925
MergedColombiaImputedUpsampledDownsampled	All data	DeepFullyConnectedNeuralNetwork_RMSprop_l1_dropoutFalse_numHiddenLayers12	DeepFullyConnectedNeuralNetwork	0.739536	0.789685	0.643613	0.354626	0.522252	0.667169	0.429056	0.893712
MergedImputedUpsampledDownsampled	All data	DeepFullyConnectedNeuralNetwork_SGD_l1_dropoutTrue_numHiddenLayers5	DeepFullyConnectedNeuralNetwork	0.85683	0.882745	0.592623	0.427836	0.50758	0.637004	0.421867	0.949038
mergedColombiaImputedUpsampled	All data	DeepFullyConnectedNeuralNetwork_SGD_l1_dropoutFalse_numHiddenLayers12	DeepFullyConnectedNeuralNetwork	0.75717	0.803816	0.646624	0.370068	0.520861	0.68108	0.421667	0.910036
mergedColombiaImputedUpsampled	All data	DeepFullyConnectedNeuralNetwork_RMSprop_l1_dropoutFalse_numHiddenLayers12	DeepFullyConnectedNeuralNetwork	0.759195	0.797488	0.638795	0.372582	0.5206	0.690731	0.417715	0.914784
MergedImputedUpsampledDownsampled	All data	DeepFullyConnectedNeuralNetwork_Adagrad_l1_dropoutFalse_numHiddenLayers12	DeepFullyConnectedNeuralNetwork	0.85648	0.882748	0.588838	0.42473	0.504429	0.636844	0.4176	0.949518
MergedColombiaImputed	All data	DeepFullyConnectedNeuralNetwork_SGD_l1_dropoutTrue_numHiddenLayers5	DeepFullyConnectedNeuralNetwork	0.747301	0.80244	0.658415	0.362373	0.519742	0.691858	0.416202	0.909302
mergedColombiaImputedUpsampled	All data	DeepFullyConnectedNeuralNetwork_RMSprop_l1_dropoutTrue_numHiddenLayers5	DeepFullyConnectedNeuralNetwork	0.753234	0.792428	0.624049	0.359507	0.512553	0.67142	0.414481	0.90758
MergedImputedUpsampled	All data	DeepFullyConnectedNeuralNetwork_Adagrad_l1_dropoutTrue_numHiddenLayers1	DeepFullyConnectedNeuralNetwork	0.85791	0.879366	0.586119	0.418649	0.497343	0.626054	0.412531	0.949389
MergedImputedUpsampled	All data	DeepFullyConnectedNeuralNetwork_RMSprop_l1_dropoutTrue_numHiddenLayers5	DeepFullyConnectedNeuralNetwork	0.840345	0.848864	0.501575	0.372424	0.463933	0.542147	0.405442	0.929672
MergedColombiaImputedUpsampledDownsampled	All data	DeepFullyConnectedNeuralNetwork_RMSprop_l1_dropoutTrue_numHiddenLayers5	DeepFullyConnectedNeuralNetwork	0.740419	0.783062	0.642515	0.346532	0.506793	0.685667	0.401937	0.908501
MergedImputedUpsampledDownsampled	All data	DeepFullyConnectedNeuralNetwork_SGD_l1_dropoutTrue_numHiddenLayers1	DeepFullyConnectedNeuralNetwork	0.85536	0.880164	0.587429	0.412385	0.491556	0.638144	0.399733	0.951949
MergedImputedUpsampledDownsampled	All data	DecisionTreeC_max_depth-3_min_samples_split-2_GridSearch	DecisionTreeC	0.847245	0.861303	0.511106	0.382684	0.466786	0.599289	0.382267	0.945815
MergedImputedUpsampled	All data	DeepFullyConnectedNeuralNetwork_Adagrad_l1_dropoutFalse_numHiddenLayers12	DeepFullyConnectedNeuralNetwork	0.861567	0.880949	0.593671	0.41105	0.484373	0.662949	0.381587	0.960153
DiabeticosImputadoMerged	Partition data - db	DecisionTreeC_max_depth-3_min_samples_split-2_RandomSearch	DecisionTreeC	0.710451	0.755618	0.594764	0.302744	0.47793	0.689201	0.365797	0.906275
MergedImputedUpsampled	All data	DeepFullyConnectedNeuralNetwork_Adagrad_l1_dropoutFalse_numHiddenLayers5	DeepFullyConnectedNeuralNetwork	0.861077	0.882236	0.593491	0.399342	0.471297	0.670378	0.363384	0.963301
MergedImputedUpsampledDownsampled	All data	DeepFullyConnectedNeuralNetwork_Adagrad_l1_dropoutFalse_numHiddenLayers5	DeepFullyConnectedNeuralNetwork	0.856643	0.88442	0.601216	0.394042	0.468574	0.666339	0.361333	0.961644
MergedImputedUpsampled	All data	DecisionTreeC_max_depth-5_min_samples_split-2_GridSearch	DecisionTreeC	0.858988	0.877517	0.565396	0.392568	0.465999	0.656849	0.361084	0.961255
MergedImputedUpsampledDownsampled	All data	DeepFullyConnectedNeuralNetwork_SGD_l1_dropoutFalse_numHiddenLayers5	DeepFullyConnectedNeuralNetwork	0.856783	0.885703	0.604891	0.391749	0.465675	0.670173	0.3568	0.962775
MergedImputedUpsampledDownsampled	All data	DeepFullyConnectedNeuralNetwork_SGD_l1_dropoutFalse_numHiddenLayers12	DeepFullyConnectedNeuralNetwork	0.857063	0.884372	0.598926	0.391291	0.464763	0.6735	0.3548	0.963538
ColDataAugmentedDownsampledErc	All data	DeepFullyConnectedNeuralNetwork_SGD_l1_dropoutTrue_numHiddenLayers5	DeepFullyConnectedNeuralNetwork	0.57295	0.623609	0.619967	0.144073	0.45131	0.625587	0.352977	0.790792
MergedImputedUpsampledDownsampled	All data	DeepFullyConnectedNeuralNetwork_RMSprop_l1_dropoutFalse_numHiddenLayers12	DeepFullyConnectedNeuralNetwork	0.855151	0.880021	0.58933	0.383784	0.458359	0.662465	0.3504	0.962153
mergedColombiaImputedUpsampled	All data	DeepFullyConnectedNeuralNetwork_RMSprop_l1_dropoutFalse_numHiddenLayers1	DeepFullyConnectedNeuralNetwork	0.751434	0.801233	0.643737	0.327831	0.465279	0.712222	0.34549	0.936395
MergedImputedUpsampled	All data	DeepFullyConnectedNeuralNetwork_SGD_l1_dropoutFalse_numHiddenLayers12	DeepFullyConnectedNeuralNetwork	0.861534	0.885285	0.606012	0.385066	0.453761	0.692141	0.337517	0.969165
DiabeticosImputadoMerged	Partition data - db	DeepFullyConnectedNeuralNetwork_SGD_l1_dropoutTrue_numHiddenLayers12	DeepFullyConnectedNeuralNetwork	0.673139	0.631764	0.520046	0.219275	0.423466	0.586634	0.331314	0.867355
MergedImputedUpsampledDownsampled	All data	DeepFullyConnectedNeuralNetwork_RMSprop_l1_dropoutTrue_numHiddenLayers5	DeepFullyConnectedNeuralNetwork	0.832809	0.847328	0.480768	0.314559	0.405112	0.536366	0.325467	0.94036
MergedImputedUpsampled	All data	DeepFullyConnectedNeuralNetwork_RMSprop_l1_dropoutFalse_numHiddenLayers5	DeepFullyConnectedNeuralNetwork	0.857633	0.87798	0.568952	0.365465	0.435644	0.671186	0.322476	0.967552
MergedImputed	All data	DeepFullyConnectedNeuralNetwork_RMSprop_l1_dropoutFalse_numHiddenLayers1	DeepFullyConnectedNeuralNetwork	0.884794	0.911917	0.576957	0.373025	0.429172	0.645859	0.321356	0.972554
MergedImputedUpsampledDownsampled	All data	DeepFullyConnectedNeuralNetwork_SGD_l1_dropoutFalse_numHiddenLayers1	DeepFullyConnectedNeuralNetwork	0.854964	0.880126	0.589652	0.364713	0.435714	0.681909	0.320133	0.968343
MergedImputedUpsampled	All data	DeepFullyConnectedNeuralNetwork_SGD_l1_dropoutFalse_numHiddenLayers5	DeepFullyConnectedNeuralNetwork	0.858269	0.8791	0.585162	0.365533	0.434839	0.67831	0.319985	0.968831
MergedImputedUpsampledDownsampled	All data	DeepFullyConnectedNeuralNetwork_RMSprop_l1_dropoutTrue_numHiddenLayers1	DeepFullyConnectedNeuralNetwork	0.851839	0.873898	0.573751	0.355732	0.429252	0.657945	0.318533	0.964894
ColDataAugmentedDownsampledErc	All data	DeepFullyConnectedNeuralNetwork_Adagrad_l1_dropoutFalse_numHiddenLayers5	DeepFullyConnectedNeuralNetwork	0.603998	0.675141	0.668851	0.20579	0.444255	0.736196	0.318108	0.887116
nodiabeticosMerged	Partition data - ndb	DeepFullyConnectedNeuralNetwork_SGD_l1_dropoutTrue_numHiddenLayers1	DeepFullyConnectedNeuralNetwork	0.928921	0.941043	0.631746	0.417579	0.448721	0.764452	0.317563	0.990193
AllDataSmoteEqual1Erc	All data	DeepFullyConnectedNeuralNetwork_RMSprop_l1_dropoutTrue_numHiddenLayers5	DeepFullyConnectedNeuralNetwork	0.644099	0.889047	0.872487	0.286892	0.463995	0.931585	0.308932	0.977436
MergedImputedUpsampled	All data	DeepFullyConnectedNeuralNetwork_Adagrad_l1_dropoutFalse_numHiddenLayers1	DeepFullyConnectedNeuralNetwork	0.85729	0.879641	0.587779	0.353613	0.421825	0.681119	0.305518	0.970621
MergedImputedUpsampled	All data	DeepFullyConnectedNeuralNetwork_RMSprop_l1_dropoutFalse_numHiddenLayers12	DeepFullyConnectedNeuralNetwork	0.855592	0.874192	0.565187	0.34764	0.417029	0.668074	0.303123	0.969067
MergedImputedUpsampledDownsampled	All data	DeepFullyConnectedNeuralNetwork_RMSprop_l1_dropoutFalse_numHiddenLayers5	DeepFullyConnectedNeuralNetwork	0.852375	0.879673	0.586603	0.324902	0.390526	0.702703	0.2704	0.975748
MergedImputed	All data	DeepFullyConnectedNeuralNetwork_RMSprop_l1_dropoutTrue_numHiddenLayers1	DeepFullyConnectedNeuralNetwork	0.867449	0.880977	0.47095	0.26226	0.32455	0.518024	0.236297	0.965756
MergedImputedUpsampled	All data	DeepFullyConnectedNeuralNetwork_Adagrad_l1_dropoutTrue_numHiddenLayers5	DeepFullyConnectedNeuralNetwork	0.852262	0.877161	0.574252	0.286757	0.346665	0.703281	0.230025	0.980067
MergedImputed	All data	DeepFullyConnectedNeuralNetwork_SGD_l1_dropoutFalse_numHiddenLayers12	DeepFullyConnectedNeuralNetwork	0.885697	0.925641	0.635052	0.297484	0.339342	0.767525	0.217824	0.989724
MergedImputedUpsampled	All data	DeepFullyConnectedNeuralNetwork_RMSprop_l1_dropoutTrue_numHiddenLayers1	DeepFullyConnectedNeuralNetwork	0.847332	0.862218	0.538681	0.248352	0.306129	0.678618	0.197643	0.980775
MergedImputed	All data	DeepFullyConnectedNeuralNetwork_RMSprop_l1_dropoutFalse_numHiddenLayers12	DeepFullyConnectedNeuralNetwork	0.877408	0.907469	0.572173	0.250677	0.296436	0.654193	0.191636	0.984222
NdbSmoteEqual1Erc	Partition data - ndb	DeepFullyConnectedNeuralNetwork_RMSprop_l1_dropoutFalse_numHiddenLayers12	DeepFullyConnectedNeuralNetwork	0.649375	0.915239	0.867778	0.142813	0.223894	0.942315	0.127039	0.994856
AllDataAugmentedDownsampledErc	All data	DeepFullyConnectedNeuralNetwork_Adagrad_l1_dropoutTrue_numHiddenLayers12	DeepFullyConnectedNeuralNetwork	0.530726	0.665258	0.655671	0.0643401	0.159488	0.786913	0.0887361	0.975803
AllDataAugmentedDownsampledErc	All data	DeepFullyConnectedNeuralNetwork_SGD_l1_dropoutTrue_numHiddenLayers12	DeepFullyConnectedNeuralNetwork	0.530789	0.713067	0.702529	0.0645057	0.150355	0.822055	0.0827447	0.981964
ColDataAugmentedDownsampledErc	All data	DeepFullyConnectedNeuralNetwork_RMSprop_l1_dropoutTrue_numHiddenLayers5	DeepFullyConnectedNeuralNetwork	0.526786	0.71908	0.682043	0.0494494	0.143277	0.722222	0.0795269	0.969709
ColDataSmoteEqual1Erc	All data	DeepFullyConnectedNeuralNetwork_Adagrad_l1_dropoutTrue_numHiddenLayers12	DeepFullyConnectedNeuralNetwork	0.495003	0.540842	0.565188	0.00561473	0.028878	0.627119	0.0147793	0.990925
nodiabeticosMerged	Partition data - ndb	DeepFullyConnectedNeuralNetwork_RMSprop_l1_dropoutFalse_numHiddenLayers5	DeepFullyConnectedNeuralNetwork	0.909723	0.937547	0.619294	0.0178849	0.0198511	0.903226	0.0100358	0.999892
ColDataSmoteEqual1Erc	All data	DeepFullyConnectedNeuralNetwork_RMSprop_l1_dropoutTrue_numHiddenLayers5	DeepFullyConnectedNeuralNetwork	0.495054	0.771303	0.758718	0.00597813	0.0130887	0.929577	0.00659077	0.999484
AllDataSmoteEqual0Point5Erc	All data	DeepFullyConnectedNeuralNetwork_SGD_l1_dropoutTrue_numHiddenLayers12	DeepFullyConnectedNeuralNetwork	0.667152	0.75584	0.620245	0.00474649	0.00829667	0.776471	0.00417062	0.999398
nodiabeticosMerged	Partition data - ndb	DeepFullyConnectedNeuralNetwork_RMSprop_l1_dropoutFalse_numHiddenLayers1	DeepFullyConnectedNeuralNetwork	0.909266	0.909618	0.508101	0.00714397	0.00785434	1	0.00394265	1
MergedImputedUpsampled	All data	DeepFullyConnectedNeuralNetwork_SGD_l1_dropoutTrue_numHiddenLayers5	DeepFullyConnectedNeuralNetwork	0.830142	0.87867	0.575686	0.00598646	0.00744062	0.866667	0.00373635	0.999882
ColDataSmoteEqual1Erc	All data	DeepFullyConnectedNeuralNetwork_SGD_l1_dropoutTrue_numHiddenLayers12	DeepFullyConnectedNeuralNetwork	0.492517	0.618337	0.610065	0.00107119	0.00279135	0.823529	0.00139804	0.999691
ColDataImputedSmoteEqual0Point5Erc	All data	DeepFullyConnectedNeuralNetwork_Adagrad_l1_dropoutTrue_numHiddenLayers12	DeepFullyConnectedNeuralNetwork	0.665855	0.781731	0.578355	0	0	0	0	1
DiabeticosImputadoMerged	Partition data - db	DeepFullyConnectedNeuralNetwork_Adagrad_l1_dropoutTrue_numHiddenLayers12	DeepFullyConnectedNeuralNetwork	0.637684	0.731521	0.552904	0	0	0	0	1
MergedColombiaImputed	All data	DeepFullyConnectedNeuralNetwork_Adagrad_l1_dropoutTrue_numHiddenLayers12	DeepFullyConnectedNeuralNetwork	0.671464	0.781987	0.591469	0	0	0	0	1
mergedColombiaImputedUpsampled	All data	DeepFullyConnectedNeuralNetwork_Adagrad_l1_dropoutTrue_numHiddenLayers12	DeepFullyConnectedNeuralNetwork	0.686987	0.794075	0.583274	0	0	0	0	1
MergedColombiaImputedUpsampledDownsampled	All data	DeepFullyConnectedNeuralNetwork_Adagrad_l1_dropoutTrue_numHiddenLayers12	DeepFullyConnectedNeuralNetwork	0.668193	0.781954	0.587275	0	0	0	0	1
MergedImputed	All data	DeepFullyConnectedNeuralNetwork_Adagrad_l1_dropoutTrue_numHiddenLayers12	DeepFullyConnectedNeuralNetwork	0.865233	0.90164	0.472452	0	0	0	0	1
MergedImputedUpsampled	All data	DeepFullyConnectedNeuralNetwork_Adagrad_l1_dropoutTrue_numHiddenLayers12	DeepFullyConnectedNeuralNetwork	0.829603	0.876902	0.54328	0	0	0	0	1
MergedImputedUpsampledDownsampled	All data	DeepFullyConnectedNeuralNetwork_Adagrad_l1_dropoutTrue_numHiddenLayers12	DeepFullyConnectedNeuralNetwork	0.825089	0.874614	0.524264	0	0	0	0	1
nodiabeticosMerged	Partition data - ndb	DeepFullyConnectedNeuralNetwork_Adagrad_l1_dropoutTrue_numHiddenLayers12	DeepFullyConnectedNeuralNetwork	0.908907	0.923045	0.484014	0	0	0	0	1
AllDataAugmentedDownsampledErc	All data	DeepFullyConnectedNeuralNetwork_RMSprop_l1_dropoutFalse_numHiddenLayers12	DeepFullyConnectedNeuralNetwork	0.49826	0.826274	0.75988	0	0	0	0	1
nodiabeticosMerged	Partition data - ndb	DeepFullyConnectedNeuralNetwork_RMSprop_l1_dropoutTrue_numHiddenLayers1	DeepFullyConnectedNeuralNetwork	0.908907	0.888491	0.494563	0	0	0	0	1
AllDataSmoteEqual0Point5Erc	All data	DeepFullyConnectedNeuralNetwork_RMSprop_l1_dropoutTrue_numHiddenLayers12	DeepFullyConnectedNeuralNetwork	0.66616	0.878247	0.704958	0	0	0	0	1
AllDataSmoteEqual1Erc	All data	DeepFullyConnectedNeuralNetwork_RMSprop_l1_dropoutTrue_numHiddenLayers12	DeepFullyConnectedNeuralNetwork	0.501369	0.855332	0.780856	0	0	0	0	1
ColDataSmoteEqual1Erc	All data	DeepFullyConnectedNeuralNetwork_RMSprop_l1_dropoutTrue_numHiddenLayers12	DeepFullyConnectedNeuralNetwork	0.491959	0.69609	0.648698	0	0	0	0	1
DiabeticosImputadoMerged	Partition data - db	DeepFullyConnectedNeuralNetwork_RMSprop_l1_dropoutTrue_numHiddenLayers12	DeepFullyConnectedNeuralNetwork	0.637684	0.763729	0.64775	0	0	0	0	1
mergedColombiaImputedUpsampled	All data	DeepFullyConnectedNeuralNetwork_RMSprop_l1_dropoutTrue_numHiddenLayers12	DeepFullyConnectedNeuralNetwork	0.686987	0.760137	0.560061	0	0	0	0	1
MergedImputed	All data	DeepFullyConnectedNeuralNetwork_RMSprop_l1_dropoutTrue_numHiddenLayers12	DeepFullyConnectedNeuralNetwork	0.865233	0.904485	0.496591	0	0	0	0	1
MergedImputedUpsampled	All data	DeepFullyConnectedNeuralNetwork_RMSprop_l1_dropoutTrue_numHiddenLayers12	DeepFullyConnectedNeuralNetwork	0.829603	0.846547	0.471589	0	0	0	0	1
MergedImputedUpsampledDownsampled	All data	DeepFullyConnectedNeuralNetwork_RMSprop_l1_dropoutTrue_numHiddenLayers12	DeepFullyConnectedNeuralNetwork	0.825089	0.860136	0.512751	0	0	0	0	1
NdbSmoteEqual1Erc	Partition data - ndb	DeepFullyConnectedNeuralNetwork_RMSprop_l1_dropoutTrue_numHiddenLayers12	DeepFullyConnectedNeuralNetwork	0.601897	0.914148	0.846026	0	0	0	0	1
nodiabeticosMerged	Partition data - ndb	DeepFullyConnectedNeuralNetwork_RMSprop_l1_dropoutTrue_numHiddenLayers12	DeepFullyConnectedNeuralNetwork	0.908907	0.92537	0.600619	0	0	0	0	1
AllDataSmoteEqual1Erc	All data	DeepFullyConnectedNeuralNetwork_SGD_l1_dropoutFalse_numHiddenLayers12	DeepFullyConnectedNeuralNetwork	0.501369	0.894505	0.855551	0	0	0	0	1
ColDataSmoteEqual1Erc	All data	DeepFullyConnectedNeuralNetwork_SGD_l1_dropoutFalse_numHiddenLayers12	DeepFullyConnectedNeuralNetwork	0.491959	0.696087	0.686087	0	0	0	0	1
NdbSmoteEqual1Erc	Partition data - ndb	DeepFullyConnectedNeuralNetwork_SGD_l1_dropoutFalse_numHiddenLayers12	DeepFullyConnectedNeuralNetwork	0.601897	0.921623	0.856568	0	0	0	0	1
nodiabeticosMerged	Partition data - ndb	DeepFullyConnectedNeuralNetwork_SGD_l1_dropoutFalse_numHiddenLayers12	DeepFullyConnectedNeuralNetwork	0.908907	0.933873	0.581756	0	0	0	0	1
ColDataImputedSmoteEqual0Point5Erc	All data	DeepFullyConnectedNeuralNetwork_SGD_l1_dropoutTrue_numHiddenLayers12	DeepFullyConnectedNeuralNetwork	0.665855	0.747292	0.542812	0	0	0	0	1
MergedColombiaImputed	All data	DeepFullyConnectedNeuralNetwork_SGD_l1_dropoutTrue_numHiddenLayers12	DeepFullyConnectedNeuralNetwork	0.671464	0.762655	0.548979	0	0	0	0	1
mergedColombiaImputedUpsampled	All data	DeepFullyConnectedNeuralNetwork_SGD_l1_dropoutTrue_numHiddenLayers12	DeepFullyConnectedNeuralNetwork	0.686987	0.768556	0.556615	0	0	0	0	1
MergedColombiaImputedUpsampledDownsampled	All data	DeepFullyConnectedNeuralNetwork_SGD_l1_dropoutTrue_numHiddenLayers12	DeepFullyConnectedNeuralNetwork	0.668193	0.715364	0.545987	0	0	0	0	1
MergedImputed	All data	DeepFullyConnectedNeuralNetwork_SGD_l1_dropoutTrue_numHiddenLayers12	DeepFullyConnectedNeuralNetwork	0.865233	0.898815	0.453627	0	0	0	0	1
MergedImputedUpsampled	All data	DeepFullyConnectedNeuralNetwork_SGD_l1_dropoutTrue_numHiddenLayers12	DeepFullyConnectedNeuralNetwork	0.829603	0.867209	0.523506	0	0	0	0	1
MergedImputedUpsampledDownsampled	All data	DeepFullyConnectedNeuralNetwork_SGD_l1_dropoutTrue_numHiddenLayers12	DeepFullyConnectedNeuralNetwork	0.825089	0.867793	0.502036	0	0	0	0	1
NdbSmoteEqual1Erc	Partition data - ndb	DeepFullyConnectedNeuralNetwork_SGD_l1_dropoutTrue_numHiddenLayers12	DeepFullyConnectedNeuralNetwork	0.601897	0.807622	0.696774	0	0	0	0	1
nodiabeticosMerged	Partition data - ndb	DeepFullyConnectedNeuralNetwork_SGD_l1_dropoutTrue_numHiddenLayers12	DeepFullyConnectedNeuralNetwork	0.908907	0.922088	0.450269	0	0	0	0	1
AllDataSmoteEqual0Point5Erc	All data	DeepFullyConnectedNeuralNetwork_SGD_l1_dropoutTrue_numHiddenLayers5	DeepFullyConnectedNeuralNetwork	0.66616	0.900821	0.756849	0	0	0	0	1
MergedImputed	All data	DeepFullyConnectedNeuralNetwork_SGD_l1_dropoutTrue_numHiddenLayers5	DeepFullyConnectedNeuralNetwork	0.865233	0.922216	0.586106	0	0	0	0	1
nodiabeticosMerged	Partition data - ndb	DeepFullyConnectedNeuralNetwork_SGD_l1_dropoutTrue_numHiddenLayers5	DeepFullyConnectedNeuralNetwork	0.908907	0.941542	0.601283	0	0	0	0	1

## Sheet: Decision Tree
project_name	model_name	model_architecture	Max_depth	Min_samples_split	Hiperparameter_search	accuracy	areaUnderCurve	averagePrecision	cohensK	f1Score	precision	recall	specificity
AllDataSmoteEqual0Point5Erc	DecisionTreeC_max_depth-1_min_samples_split-2_GridSearch	DecisionTreeC	1	2	GridSearch	0.832606	0.841086	0.652814	0.644456	0.775613	0.701914	0.866603	0.815568
AllDataSmoteEqual1Erc	DecisionTreeC_max_depth-1_min_samples_split-2_GridSearch	DecisionTreeC	1	2	GridSearch	0.844817	0.845042	0.773903	0.689772	0.856251	0.795615	0.926892	0.763191
ColDataSmoteEqual1Erc	DecisionTreeC_max_depth-1_min_samples_split-2_GridSearch	DecisionTreeC	1	2	GridSearch	0.69616	0.695576	0.640678	0.391547	0.709934	0.689269	0.731875	0.659276
DbSmoteEqual0Point5Erc	DecisionTreeC_max_depth-1_min_samples_split-2_GridSearch	DecisionTreeC	1	2	GridSearch	0.717591	0.694533	0.749012	0.388437	0.77876	0.780396	0.77713	0.611936
ColDataAugmentedDownsampledErc	DecisionTreeC_max_depth-1_min_samples_split-9_RandomSearch	DecisionTreeC	1	9	RandomSearch	0.682731	0.683062	0.618786	0.365877	0.701992	0.658973	0.75102	0.615105
MergedImputed	DecisionTreeC_max_depth-16_min_samples_split-5_RandomSearch	DecisionTreeC	16	5	RandomSearch	0.895136	0.909373	0.620804	0.513714	0.57283	0.635038	0.521721	0.953298
AllDataAugmentedDownsampledErc	DecisionTreeC_max_depth-17_min_samples_split-11_RandomSearch	DecisionTreeC	17	11	RandomSearch	0.8764	0.936906	0.923478	0.752761	0.879392	0.861464	0.898083	0.854566
ColDataSmoteEqual1Erc	DecisionTreeC_max_depth-18_min_samples_split-6_RandomSearch	DecisionTreeC	18	6	RandomSearch	0.750748	0.83124	0.832435	0.501525	0.752307	0.759699	0.745057	0.756626
MergedImputed	DecisionTreeC_max_depth-2_min_samples_split-2_GridSearch	DecisionTreeC	2	2	GridSearch	0.889527	0.893981	0.501596	0.473508	0.5349	0.618211	0.471376	0.954658
NdbSmoteEqual1Erc	DecisionTreeC_max_depth-26_min_samples_split-12_RandomSearch	DecisionTreeC	26	12	RandomSearch	0.914114	0.950654	0.907897	0.821345	0.893122	0.884991	0.901403	0.922521
AllDataSmoteEqual0Point5Erc	DecisionTreeC_max_depth-29_min_samples_split-10_RandomSearch	DecisionTreeC	29	10	RandomSearch	0.878468	0.925595	0.845829	0.724646	0.815133	0.828074	0.802591	0.916492
MergedImputedUpsampled	DecisionTreeC_max_depth-29_min_samples_split-6_RandomSearch	DecisionTreeC	29	6	RandomSearch	0.881385	0.832252	0.566462	0.561355	0.631766	0.670648	0.597145	0.939767
MergedImputedUpsampledDownsampled	DecisionTreeC_max_depth-3_min_samples_split-2_GridSearch	DecisionTreeC	3	2	GridSearch	0.847245	0.861303	0.511106	0.382684	0.466786	0.599289	0.382267	0.945815
DiabeticosImputadoMerged	DecisionTreeC_max_depth-3_min_samples_split-2_RandomSearch	DecisionTreeC	3	2	RandomSearch	0.710451	0.755618	0.594764	0.302744	0.47793	0.689201	0.365797	0.906275
DbSmoteEqual1Erc	DecisionTreeC_max_depth-32_min_samples_split-2_RandomSearch	DecisionTreeC	32	2	RandomSearch	0.869453	0.860402	0.932989	0.61768	0.916482	0.915896	0.917068	0.699597
AllDataSmoteEqual1Erc	DecisionTreeC_max_depth-33_min_samples_split-2_RandomSearch	DecisionTreeC	33	2	RandomSearch	0.907283	0.909326	0.869445	0.814571	0.90765	0.901625	0.913755	0.900846
DbSmoteEqual1Erc	DecisionTreeC_max_depth-38_min_samples_split-13_RandomSearch	DecisionTreeC	38	13	RandomSearch	0.867454	0.882897	0.947029	0.615768	0.914864	0.917948	0.9118	0.709262
AllDataAugmentedDownsampledErc	DecisionTreeC_max_depth-4_min_samples_split-2_GridSearch	DecisionTreeC	4	2	GridSearch	0.852256	0.917755	0.884339	0.704397	0.860306	0.81841	0.906723	0.797409
ColDataAugmentedDownsampledErc	DecisionTreeC_max_depth-4_min_samples_split-2_GridSearch	DecisionTreeC	4	2	GridSearch	0.720272	0.78467	0.752975	0.440762	0.730419	0.701672	0.761623	0.679321
MergedImputedUpsampledDownsampled	DecisionTreeC_max_depth-43_min_samples_split-12_RandomSearch	DecisionTreeC	43	12	RandomSearch	0.868094	0.868087	0.619728	0.510549	0.588295	0.647804	0.5388	0.937901
COLAugmentedpositivesx2	DecisionTreeC_max_depth-5_min_samples_split-2_GridSearch	DecisionTreeC	5	2	GridSearch	0.846586	0.926586	0.96245	0.661895	0.882573	0.908635	0.857964	0.82328
ColDataImputedSmoteEqual0Point5Erc	DecisionTreeC_max_depth-5_min_samples_split-2_GridSearch	DecisionTreeC	5	2	GridSearch	0.752706	0.804801	0.659409	0.385518	0.542084	0.710907	0.438057	0.910605
DbSmoteEqual1Erc	DecisionTreeC_max_depth-5_min_samples_split-2_GridSearch	DecisionTreeC	5	2	GridSearch	0.81473	0.797324	0.919255	0.316814	0.890251	0.828409	0.962071	0.289128
DbSmoteEqual1Erc	DecisionTreeC_max_depth-5_min_samples_split-2_GridSearch	DecisionTreeC	5	2	GridSearch	0.81473	0.797324	0.919255	0.316814	0.890251	0.828409	0.962071	0.289128
DiabeticosImputadoMerged	DecisionTreeC_max_depth-5_min_samples_split-2_GridSearch	DecisionTreeC	5	2	GridSearch	0.731386	0.778208	0.638943	0.404371	0.607451	0.645517	0.573625	0.821022
MergedColombiaImputed	DecisionTreeC_max_depth-5_min_samples_split-2_GridSearch	DecisionTreeC	5	2	GridSearch	0.749338	0.799364	0.644594	0.383025	0.548545	0.671758	0.463526	0.889181
mergedColombiaImputedUpsampled	DecisionTreeC_max_depth-5_min_samples_split-2_GridSearch	DecisionTreeC	5	2	GridSearch	0.757395	0.798668	0.628213	0.378317	0.533016	0.670479	0.442328	0.90095
MergedColombiaImputedUpsampledDownsampled	DecisionTreeC_max_depth-5_min_samples_split-2_GridSearch	DecisionTreeC	5	2	GridSearch	0.745159	0.793533	0.638388	0.37251	0.538953	0.674182	0.44891	0.892269
MergedImputedUpsampled	DecisionTreeC_max_depth-5_min_samples_split-2_GridSearch	DecisionTreeC	5	2	GridSearch	0.858988	0.877517	0.565396	0.392568	0.465999	0.656849	0.361084	0.961255
NdbSmoteEqual1Erc	DecisionTreeC_max_depth-5_min_samples_split-2_GridSearch	DecisionTreeC	5	2	GridSearch	0.874321	0.942433	0.89489	0.741329	0.84835	0.816299	0.883022	0.868566
nodiabeticosMerged	DecisionTreeC_max_depth-5_min_samples_split-2_GridSearch	DecisionTreeC	5	2	GridSearch	0.93186	0.942611	0.638933	0.54483	0.581344	0.660137	0.519355	0.973202
MergedColombiaImputed	DecisionTreeC_max_depth-6_min_samples_split-16_RandomSearch	DecisionTreeC	6	16	RandomSearch	0.755788	0.807455	0.657832	0.425974	0.600378	0.649207	0.55838	0.852376
MergedColombiaImputedUpsampledDownsampled	DecisionTreeC_max_depth-7_min_samples_split-10_RandomSearch	DecisionTreeC	7	10	RandomSearch	0.753113	0.804594	0.660936	0.423658	0.601065	0.647915	0.560533	0.848744
ColDataImputedSmoteEqual0Point5Erc	DecisionTreeC_max_depth-7_min_samples_split-17_RandomSearch	DecisionTreeC	7	17	RandomSearch	0.756358	0.813132	0.67543	0.422784	0.593454	0.670663	0.532186	0.868854
nodiabeticosMerged	DecisionTreeC_max_depth-8_min_samples_split-10_RandomSearch	DecisionTreeC	8	10	RandomSearch	0.932023	0.942392	0.638754	0.535227	0.571252	0.671346	0.497133	0.975609
mergedColombiaImputedUpsampled	DecisionTreeC_max_depth-8_min_samples_split-18_RandomSearch	DecisionTreeC	8	18	RandomSearch	0.7624	0.812422	0.651636	0.413368	0.574992	0.653257	0.513475	0.875819
COLAugmentedpositivesx2	DecisionTreeC_max_depth-None_min_samples_split-13_RandomSearch	DecisionTreeC	-	13	RandomSearch	0.866271	0.941052	0.972139	0.703825	0.898145	0.919865	0.877427	0.843421
DbSmoteEqual0Point5Erc	DecisionTreeC_max_depth-None_min_samples_split-2_RandomSearch	DecisionTreeC	-	2	RandomSearch	0.801912	0.784268	0.812396	0.569344	0.845604	0.843091	0.848132	0.719894

## Sheet: Neural Network
project_name	model_name	model_architecture	Optimizer	L1	Drop_out	Number_of_hidden_layers	accuracy	areaUnderCurve	averagePrecision	cohensK	f1Score	precision	recall	specificity
AllDataAugmentedDownsampledErc	DeepFullyConnectedNeuralNetwork_Adagrad_l1_dropoutFalse_numHiddenLayers1	DeepFullyConnectedNeuralNetwork	Adagrad	TRUE	FALSE	1	0.84463	0.914482	0.892006	0.689078	0.856918	0.796479	0.927283	0.7614
AllDataSmoteEqual0Point5Erc	DeepFullyConnectedNeuralNetwork_Adagrad_l1_dropoutFalse_numHiddenLayers1	DeepFullyConnectedNeuralNetwork	Adagrad	TRUE	FALSE	1	0.832627	0.914099	0.804668	0.642279	0.772964	0.706344	0.85346	0.822186
AllDataSmoteEqual1Erc	DeepFullyConnectedNeuralNetwork_Adagrad_l1_dropoutFalse_numHiddenLayers1	DeepFullyConnectedNeuralNetwork	Adagrad	TRUE	FALSE	1	0.848014	0.917523	0.89183	0.696151	0.858356	0.801752	0.92356	0.772879
COLAugmentedpositivesx2	DeepFullyConnectedNeuralNetwork_Adagrad_l1_dropoutFalse_numHiddenLayers1	DeepFullyConnectedNeuralNetwork	Adagrad	TRUE	FALSE	1	0.759546	0.832441	0.916319	0.427537	0.828794	0.794542	0.866132	0.54121
ColDataAugmentedDownsampledErc	DeepFullyConnectedNeuralNetwork_Adagrad_l1_dropoutFalse_numHiddenLayers1	DeepFullyConnectedNeuralNetwork	Adagrad	TRUE	FALSE	1	0.711343	0.783037	0.760193	0.422823	0.717506	0.699245	0.736746	0.686187
ColDataImputedSmoteEqual0Point5Erc	DeepFullyConnectedNeuralNetwork_Adagrad_l1_dropoutFalse_numHiddenLayers1	DeepFullyConnectedNeuralNetwork	Adagrad	TRUE	FALSE	1	0.751218	0.809075	0.678476	0.424076	0.604516	0.644725	0.569028	0.842645
ColDataSmoteEqual1Erc	DeepFullyConnectedNeuralNetwork_Adagrad_l1_dropoutFalse_numHiddenLayers1	DeepFullyConnectedNeuralNetwork	Adagrad	TRUE	FALSE	1	0.714423	0.78565	0.770986	0.428048	0.728396	0.704696	0.753745	0.673817
DbSmoteEqual0Point5Erc	DeepFullyConnectedNeuralNetwork_Adagrad_l1_dropoutFalse_numHiddenLayers1	DeepFullyConnectedNeuralNetwork	Adagrad	TRUE	FALSE	1	0.716348	0.762364	0.839912	0.343517	0.794884	0.739421	0.859342	0.462599
DbSmoteEqual1Erc	DeepFullyConnectedNeuralNetwork_Adagrad_l1_dropoutFalse_numHiddenLayers1	DeepFullyConnectedNeuralNetwork	Adagrad	TRUE	FALSE	1	0.802445	0.762768	0.910269	0.182805	0.886495	0.80408	0.987733	0.141477
DbSmoteEqual1Erc	DeepFullyConnectedNeuralNetwork_Adagrad_l1_dropoutFalse_numHiddenLayers1	DeepFullyConnectedNeuralNetwork	Adagrad	TRUE	FALSE	1	0.805678	0.762312	0.910506	0.248074	0.886415	0.815527	0.970801	0.216644
DiabeticosImputadoMerged	DeepFullyConnectedNeuralNetwork_Adagrad_l1_dropoutFalse_numHiddenLayers1	DeepFullyConnectedNeuralNetwork	Adagrad	TRUE	FALSE	1	0.718048	0.779244	0.654841	0.366501	0.574631	0.633708	0.525629	0.827376
MergedColombiaImputed	DeepFullyConnectedNeuralNetwork_Adagrad_l1_dropoutFalse_numHiddenLayers1	DeepFullyConnectedNeuralNetwork	Adagrad	TRUE	FALSE	1	0.74703	0.804048	0.65906	0.408528	0.590459	0.630664	0.555073	0.84095
mergedColombiaImputedUpsampled	DeepFullyConnectedNeuralNetwork_Adagrad_l1_dropoutFalse_numHiddenLayers1	DeepFullyConnectedNeuralNetwork	Adagrad	TRUE	FALSE	1	0.758801	0.804201	0.646408	0.390299	0.548193	0.662592	0.467481	0.891536
MergedColombiaImputedUpsampledDownsampled	DeepFullyConnectedNeuralNetwork_Adagrad_l1_dropoutFalse_numHiddenLayers1	DeepFullyConnectedNeuralNetwork	Adagrad	TRUE	FALSE	1	0.749418	0.800643	0.659428	0.402901	0.577429	0.655491	0.515981	0.865336
MergedImputed	DeepFullyConnectedNeuralNetwork_Adagrad_l1_dropoutFalse_numHiddenLayers1	DeepFullyConnectedNeuralNetwork	Adagrad	TRUE	FALSE	1	0.896175	0.929517	0.654077	0.544855	0.604564	0.621066	0.588916	0.944033
MergedImputedUpsampled	DeepFullyConnectedNeuralNetwork_Adagrad_l1_dropoutFalse_numHiddenLayers1	DeepFullyConnectedNeuralNetwork	Adagrad	TRUE	FALSE	1	0.85729	0.879641	0.587779	0.353613	0.421825	0.681119	0.305518	0.970621
MergedImputedUpsampledDownsampled	DeepFullyConnectedNeuralNetwork_Adagrad_l1_dropoutFalse_numHiddenLayers1	DeepFullyConnectedNeuralNetwork	Adagrad	TRUE	FALSE	1	0.855337	0.881559	0.593551	0.437483	0.520077	0.619539	0.448133	0.94166
NdbSmoteEqual1Erc	DeepFullyConnectedNeuralNetwork_Adagrad_l1_dropoutFalse_numHiddenLayers1	DeepFullyConnectedNeuralNetwork	Adagrad	TRUE	FALSE	1	0.865141	0.936784	0.884501	0.724552	0.840792	0.793172	0.894496	0.845725
nodiabeticosMerged	DeepFullyConnectedNeuralNetwork_Adagrad_l1_dropoutFalse_numHiddenLayers1	DeepFullyConnectedNeuralNetwork	Adagrad	TRUE	FALSE	1	0.932056	0.945188	0.65253	0.524246	0.559763	0.683015	0.474194	0.977944
AllDataAugmentedDownsampledErc	DeepFullyConnectedNeuralNetwork_Adagrad_l1_dropoutFalse_numHiddenLayers12	DeepFullyConnectedNeuralNetwork	Adagrad	TRUE	FALSE	12	0.828935	0.895926	0.857697	0.65771	0.839927	0.791639	0.894488	0.762924
AllDataSmoteEqual0Point5Erc	DeepFullyConnectedNeuralNetwork_Adagrad_l1_dropoutFalse_numHiddenLayers12	DeepFullyConnectedNeuralNetwork	Adagrad	TRUE	FALSE	12	0.819379	0.902647	0.771662	0.614634	0.755804	0.688777	0.837283	0.810406
AllDataSmoteEqual1Erc	DeepFullyConnectedNeuralNetwork_Adagrad_l1_dropoutFalse_numHiddenLayers12	DeepFullyConnectedNeuralNetwork	Adagrad	TRUE	FALSE	12	0.832967	0.904333	0.87286	0.666127	0.84873	0.773789	0.939743	0.726774
COLAugmentedpositivesx2	DeepFullyConnectedNeuralNetwork_Adagrad_l1_dropoutFalse_numHiddenLayers12	DeepFullyConnectedNeuralNetwork	Adagrad	TRUE	FALSE	12	0.671963	0.788711	0.887006	0	0.803802	0.671963	1	0
ColDataAugmentedDownsampledErc	DeepFullyConnectedNeuralNetwork_Adagrad_l1_dropoutFalse_numHiddenLayers12	DeepFullyConnectedNeuralNetwork	Adagrad	TRUE	FALSE	12	0.497565	0.769944	0.749242	0	0.664499	0.497565	1	0
ColDataImputedSmoteEqual0Point5Erc	DeepFullyConnectedNeuralNetwork_Adagrad_l1_dropoutFalse_numHiddenLayers12	DeepFullyConnectedNeuralNetwork	Adagrad	TRUE	FALSE	12	0.753517	0.807844	0.671747	0.401483	0.566294	0.687175	0.481579	0.889984
ColDataSmoteEqual1Erc	DeepFullyConnectedNeuralNetwork_Adagrad_l1_dropoutFalse_numHiddenLayers12	DeepFullyConnectedNeuralNetwork	Adagrad	TRUE	FALSE	12	0.692811	0.759899	0.736478	0.38345	0.725135	0.664752	0.797583	0.584614
DbSmoteEqual0Point5Erc	DeepFullyConnectedNeuralNetwork_Adagrad_l1_dropoutFalse_numHiddenLayers12	DeepFullyConnectedNeuralNetwork	Adagrad	TRUE	FALSE	12	0.681262	0.753765	0.832481	0.155185	0.79816	0.670737	0.985351	0.141645
DbSmoteEqual1Erc	DeepFullyConnectedNeuralNetwork_Adagrad_l1_dropoutFalse_numHiddenLayers12	DeepFullyConnectedNeuralNetwork	Adagrad	TRUE	FALSE	12	0.78105	0.704711	0.880594	0	0.877067	0.78105	1	0
DbSmoteEqual1Erc	DeepFullyConnectedNeuralNetwork_Adagrad_l1_dropoutFalse_numHiddenLayers12	DeepFullyConnectedNeuralNetwork	Adagrad	TRUE	FALSE	12	0.78105	0.751143	0.904071	0	0.877067	0.78105	1	0
DiabeticosImputadoMerged	DeepFullyConnectedNeuralNetwork_Adagrad_l1_dropoutFalse_numHiddenLayers12	DeepFullyConnectedNeuralNetwork	Adagrad	TRUE	FALSE	12	0.720074	0.779214	0.649753	0.391889	0.610249	0.61575	0.604846	0.785544
MergedColombiaImputed	DeepFullyConnectedNeuralNetwork_Adagrad_l1_dropoutFalse_numHiddenLayers12	DeepFullyConnectedNeuralNetwork	Adagrad	TRUE	FALSE	12	0.749678	0.804108	0.65761	0.410967	0.589467	0.639063	0.547014	0.848837
mergedColombiaImputedUpsampled	DeepFullyConnectedNeuralNetwork_Adagrad_l1_dropoutFalse_numHiddenLayers12	DeepFullyConnectedNeuralNetwork	Adagrad	TRUE	FALSE	12	0.756889	0.803719	0.643593	0.380526	0.537301	0.664549	0.450952	0.896284
MergedColombiaImputedUpsampledDownsampled	DeepFullyConnectedNeuralNetwork_Adagrad_l1_dropoutFalse_numHiddenLayers12	DeepFullyConnectedNeuralNetwork	Adagrad	TRUE	FALSE	12	0.745963	0.796755	0.647504	0.386411	0.559119	0.659106	0.485472	0.875316
MergedImputed	DeepFullyConnectedNeuralNetwork_Adagrad_l1_dropoutFalse_numHiddenLayers12	DeepFullyConnectedNeuralNetwork	Adagrad	TRUE	FALSE	12	0.89623	0.925244	0.64596	0.51127	0.56932	0.645968	0.508932	0.956555
MergedImputedUpsampled	DeepFullyConnectedNeuralNetwork_Adagrad_l1_dropoutFalse_numHiddenLayers12	DeepFullyConnectedNeuralNetwork	Adagrad	TRUE	FALSE	12	0.861567	0.880949	0.593671	0.41105	0.484373	0.662949	0.381587	0.960153
MergedImputedUpsampledDownsampled	DeepFullyConnectedNeuralNetwork_Adagrad_l1_dropoutFalse_numHiddenLayers12	DeepFullyConnectedNeuralNetwork	Adagrad	TRUE	FALSE	12	0.85648	0.882748	0.588838	0.42473	0.504429	0.636844	0.4176	0.949518
NdbSmoteEqual1Erc	DeepFullyConnectedNeuralNetwork_Adagrad_l1_dropoutFalse_numHiddenLayers12	DeepFullyConnectedNeuralNetwork	Adagrad	TRUE	FALSE	12	0.854771	0.929969	0.864026	0.708506	0.836709	0.757359	0.934631	0.80195
nodiabeticosMerged	DeepFullyConnectedNeuralNetwork_Adagrad_l1_dropoutFalse_numHiddenLayers12	DeepFullyConnectedNeuralNetwork	Adagrad	TRUE	FALSE	12	0.930064	0.941578	0.633617	0.543978	0.581804	0.638937	0.53405	0.969754
DbSmoteEqual1Erc	DeepFullyConnectedNeuralNetwork_Adagrad_l1_dropoutFalse_numHiddenLayers14	DeepFullyConnectedNeuralNetwork	Adagrad	TRUE	FALSE	14	0.771116	0.678874	0.871971	0.0463029	0.86873	0.786822	0.969672	0.0628188
DbSmoteEqual1Erc	DeepFullyConnectedNeuralNetwork_Adagrad_l1_dropoutFalse_numHiddenLayers3	DeepFullyConnectedNeuralNetwork	Adagrad	TRUE	FALSE	3	0.803092	0.774103	0.914942	0.338384	0.880014	0.839598	0.924518	0.369933
AllDataAugmentedDownsampledErc	DeepFullyConnectedNeuralNetwork_Adagrad_l1_dropoutFalse_numHiddenLayers5	DeepFullyConnectedNeuralNetwork	Adagrad	TRUE	FALSE	5	0.836877	0.901399	0.872129	0.67358	0.848787	0.793419	0.912462	0.760765
AllDataSmoteEqual0Point5Erc	DeepFullyConnectedNeuralNetwork_Adagrad_l1_dropoutFalse_numHiddenLayers5	DeepFullyConnectedNeuralNetwork	Adagrad	TRUE	FALSE	5	0.816699	0.901578	0.770195	0.615819	0.760389	0.674577	0.871216	0.789379
AllDataSmoteEqual1Erc	DeepFullyConnectedNeuralNetwork_Adagrad_l1_dropoutFalse_numHiddenLayers5	DeepFullyConnectedNeuralNetwork	Adagrad	TRUE	FALSE	5	0.837682	0.905992	0.870734	0.675541	0.852208	0.780422	0.938537	0.737377
COLAugmentedpositivesx2	DeepFullyConnectedNeuralNetwork_Adagrad_l1_dropoutFalse_numHiddenLayers5	DeepFullyConnectedNeuralNetwork	Adagrad	TRUE	FALSE	5	0.672167	0.827699	0.912513	0.000903628	0.803891	0.672112	0.99995	0.000722991
ColDataAugmentedDownsampledErc	DeepFullyConnectedNeuralNetwork_Adagrad_l1_dropoutFalse_numHiddenLayers5	DeepFullyConnectedNeuralNetwork	Adagrad	TRUE	FALSE	5	0.603998	0.675141	0.668851	0.20579	0.444255	0.736196	0.318108	0.887116
ColDataImputedSmoteEqual0Point5Erc	DeepFullyConnectedNeuralNetwork_Adagrad_l1_dropoutFalse_numHiddenLayers5	DeepFullyConnectedNeuralNetwork	Adagrad	TRUE	FALSE	5	0.752503	0.806293	0.673628	0.42439	0.602758	0.649965	0.561943	0.848131
ColDataSmoteEqual1Erc	DeepFullyConnectedNeuralNetwork_Adagrad_l1_dropoutFalse_numHiddenLayers5	DeepFullyConnectedNeuralNetwork	Adagrad	TRUE	FALSE	5	0.613312	0.652749	0.625494	0.221837	0.67758	0.587773	0.79978	0.420749
DbSmoteEqual0Point5Erc	DeepFullyConnectedNeuralNetwork_Adagrad_l1_dropoutFalse_numHiddenLayers5	DeepFullyConnectedNeuralNetwork	Adagrad	TRUE	FALSE	5	0.714436	0.765489	0.841994	0.373384	0.780028	0.768762	0.791629	0.577454
DbSmoteEqual1Erc	DeepFullyConnectedNeuralNetwork_Adagrad_l1_dropoutFalse_numHiddenLayers5	DeepFullyConnectedNeuralNetwork	Adagrad	TRUE	FALSE	5	0.78105	0.744063	0.901755	0	0.877067	0.78105	1	0
DbSmoteEqual1Erc	DeepFullyConnectedNeuralNetwork_Adagrad_l1_dropoutFalse_numHiddenLayers5	DeepFullyConnectedNeuralNetwork	Adagrad	TRUE	FALSE	5	0.799447	0.772281	0.914696	0.341062	0.876894	0.842251	0.914509	0.388993
DiabeticosImputadoMerged	DeepFullyConnectedNeuralNetwork_Adagrad_l1_dropoutFalse_numHiddenLayers5	DeepFullyConnectedNeuralNetwork	Adagrad	TRUE	FALSE	5	0.719399	0.778518	0.654272	0.384453	0.600289	0.620278	0.581547	0.797723
MergedColombiaImputed	DeepFullyConnectedNeuralNetwork_Adagrad_l1_dropoutFalse_numHiddenLayers5	DeepFullyConnectedNeuralNetwork	Adagrad	TRUE	FALSE	5	0.748388	0.802841	0.658379	0.408029	0.587489	0.636671	0.545361	0.847725
mergedColombiaImputedUpsampled	DeepFullyConnectedNeuralNetwork_Adagrad_l1_dropoutFalse_numHiddenLayers5	DeepFullyConnectedNeuralNetwork	Adagrad	TRUE	FALSE	5	0.758632	0.805179	0.646667	0.390164	0.548306	0.661839	0.46802	0.891045
MergedColombiaImputedUpsampledDownsampled	DeepFullyConnectedNeuralNetwork_Adagrad_l1_dropoutFalse_numHiddenLayers5	DeepFullyConnectedNeuralNetwork	Adagrad	TRUE	FALSE	5	0.745642	0.796411	0.652947	0.375111	0.542089	0.673132	0.453753	0.890586
MergedImputed	DeepFullyConnectedNeuralNetwork_Adagrad_l1_dropoutFalse_numHiddenLayers5	DeepFullyConnectedNeuralNetwork	Adagrad	TRUE	FALSE	5	0.892509	0.925867	0.626245	0.522679	0.584277	0.610166	0.560495	0.944223
MergedImputedUpsampled	DeepFullyConnectedNeuralNetwork_Adagrad_l1_dropoutFalse_numHiddenLayers5	DeepFullyConnectedNeuralNetwork	Adagrad	TRUE	FALSE	5	0.861077	0.882236	0.593491	0.399342	0.471297	0.670378	0.363384	0.963301
MergedImputedUpsampledDownsampled	DeepFullyConnectedNeuralNetwork_Adagrad_l1_dropoutFalse_numHiddenLayers5	DeepFullyConnectedNeuralNetwork	Adagrad	TRUE	FALSE	5	0.856643	0.88442	0.601216	0.394042	0.468574	0.666339	0.361333	0.961644
NdbSmoteEqual1Erc	DeepFullyConnectedNeuralNetwork_Adagrad_l1_dropoutFalse_numHiddenLayers5	DeepFullyConnectedNeuralNetwork	Adagrad	TRUE	FALSE	5	0.855702	0.929352	0.867118	0.708321	0.834554	0.767685	0.914183	0.817021
nodiabeticosMerged	DeepFullyConnectedNeuralNetwork_Adagrad_l1_dropoutFalse_numHiddenLayers5	DeepFullyConnectedNeuralNetwork	Adagrad	TRUE	FALSE	5	0.93088	0.936144	0.634247	0.509225	0.545025	0.680623	0.45448	0.978626
DbSmoteEqual1Erc	DeepFullyConnectedNeuralNetwork_Adagrad_l1_dropoutFalse_numHiddenLayers8	DeepFullyConnectedNeuralNetwork	Adagrad	TRUE	FALSE	8	0.78105	0.710804	0.882388	0	0.877067	0.78105	1	0
AllDataAugmentedDownsampledErc	DeepFullyConnectedNeuralNetwork_Adagrad_l1_dropoutTrue_numHiddenLayers1	DeepFullyConnectedNeuralNetwork	Adagrad	TRUE	TRUE	1	0.8558	0.923019	0.903046	0.711477	0.864371	0.818407	0.915805	0.795377
AllDataSmoteEqual0Point5Erc	DeepFullyConnectedNeuralNetwork_Adagrad_l1_dropoutTrue_numHiddenLayers1	DeepFullyConnectedNeuralNetwork	Adagrad	TRUE	TRUE	1	0.847436	0.921826	0.823935	0.661346	0.777244	0.758188	0.797283	0.87257
AllDataSmoteEqual1Erc	DeepFullyConnectedNeuralNetwork_Adagrad_l1_dropoutTrue_numHiddenLayers1	DeepFullyConnectedNeuralNetwork	Adagrad	TRUE	TRUE	1	0.851668	0.921976	0.89878	0.703379	0.855201	0.833133	0.878471	0.825013
COLAugmentedpositivesx2	DeepFullyConnectedNeuralNetwork_Adagrad_l1_dropoutTrue_numHiddenLayers1	DeepFullyConnectedNeuralNetwork	Adagrad	TRUE	TRUE	1	0.799017	0.881729	0.944571	0.528275	0.855091	0.829361	0.882469	0.628073
ColDataAugmentedDownsampledErc	DeepFullyConnectedNeuralNetwork_Adagrad_l1_dropoutTrue_numHiddenLayers1	DeepFullyConnectedNeuralNetwork	Adagrad	TRUE	TRUE	1	0.713271	0.795632	0.78076	0.427	0.734398	0.681137	0.796697	0.630654
ColDataImputedSmoteEqual0Point5Erc	DeepFullyConnectedNeuralNetwork_Adagrad_l1_dropoutTrue_numHiddenLayers1	DeepFullyConnectedNeuralNetwork	Adagrad	TRUE	TRUE	1	0.753247	0.80885	0.678291	0.427107	0.605366	0.650093	0.566397	0.847013
ColDataSmoteEqual1Erc	DeepFullyConnectedNeuralNetwork_Adagrad_l1_dropoutTrue_numHiddenLayers1	DeepFullyConnectedNeuralNetwork	Adagrad	TRUE	TRUE	1	0.720055	0.795079	0.784079	0.439592	0.729986	0.715698	0.744857	0.694442
DbSmoteEqual0Point5Erc	DeepFullyConnectedNeuralNetwork_Adagrad_l1_dropoutTrue_numHiddenLayers1	DeepFullyConnectedNeuralNetwork	Adagrad	TRUE	TRUE	1	0.71979	0.770995	0.846008	0.375625	0.788207	0.762904	0.815247	0.550398
DbSmoteEqual1Erc	DeepFullyConnectedNeuralNetwork_Adagrad_l1_dropoutTrue_numHiddenLayers1	DeepFullyConnectedNeuralNetwork	Adagrad	TRUE	TRUE	1	0.802151	0.772496	0.914609	0.330317	0.879726	0.837529	0.9264	0.358926
DbSmoteEqual1Erc	DeepFullyConnectedNeuralNetwork_Adagrad_l1_dropoutTrue_numHiddenLayers1	DeepFullyConnectedNeuralNetwork	Adagrad	TRUE	TRUE	1	0.805502	0.77476	0.915618	0.323112	0.882788	0.833902	0.937763	0.333691
DiabeticosImputadoMerged	DeepFullyConnectedNeuralNetwork_Adagrad_l1_dropoutTrue_numHiddenLayers1	DeepFullyConnectedNeuralNetwork	Adagrad	TRUE	TRUE	1	0.720581	0.776718	0.654943	0.380539	0.591862	0.628601	0.55918	0.812285
MergedColombiaImputed	DeepFullyConnectedNeuralNetwork_Adagrad_l1_dropoutTrue_numHiddenLayers1	DeepFullyConnectedNeuralNetwork	Adagrad	TRUE	TRUE	1	0.74832	0.803626	0.660239	0.4133	0.594996	0.631201	0.56272	0.83913
mergedColombiaImputedUpsampled	DeepFullyConnectedNeuralNetwork_Adagrad_l1_dropoutTrue_numHiddenLayers1	DeepFullyConnectedNeuralNetwork	Adagrad	TRUE	TRUE	1	0.761107	0.805303	0.648211	0.394873	0.550666	0.669496	0.467661	0.89481
MergedColombiaImputedUpsampledDownsampled	DeepFullyConnectedNeuralNetwork_Adagrad_l1_dropoutTrue_numHiddenLayers1	DeepFullyConnectedNeuralNetwork	Adagrad	TRUE	TRUE	1	0.749096	0.798865	0.658677	0.405885	0.582431	0.650343	0.527361	0.859204
MergedImputed	DeepFullyConnectedNeuralNetwork_Adagrad_l1_dropoutTrue_numHiddenLayers1	DeepFullyConnectedNeuralNetwork	Adagrad	TRUE	TRUE	1	0.896476	0.928993	0.651237	0.535055	0.594166	0.629832	0.562322	0.948523
MergedImputedUpsampled	DeepFullyConnectedNeuralNetwork_Adagrad_l1_dropoutTrue_numHiddenLayers1	DeepFullyConnectedNeuralNetwork	Adagrad	TRUE	TRUE	1	0.85791	0.879366	0.586119	0.418649	0.497343	0.626054	0.412531	0.949389
MergedImputedUpsampledDownsampled	DeepFullyConnectedNeuralNetwork_Adagrad_l1_dropoutTrue_numHiddenLayers1	DeepFullyConnectedNeuralNetwork	Adagrad	TRUE	TRUE	1	0.84925	0.880692	0.591675	0.452277	0.54208	0.578295	0.510133	0.92114
NdbSmoteEqual1Erc	DeepFullyConnectedNeuralNetwork_Adagrad_l1_dropoutTrue_numHiddenLayers1	DeepFullyConnectedNeuralNetwork	Adagrad	TRUE	TRUE	1	0.867068	0.94196	0.897443	0.731217	0.847461	0.780095	0.927561	0.827057
nodiabeticosMerged	DeepFullyConnectedNeuralNetwork_Adagrad_l1_dropoutTrue_numHiddenLayers1	DeepFullyConnectedNeuralNetwork	Adagrad	TRUE	TRUE	1	0.930815	0.944606	0.645293	0.539166	0.576285	0.651741	0.516487	0.97234
AllDataAugmentedDownsampledErc	DeepFullyConnectedNeuralNetwork_Adagrad_l1_dropoutTrue_numHiddenLayers12	DeepFullyConnectedNeuralNetwork	Adagrad	TRUE	TRUE	12	0.530726	0.665258	0.655671	0.0643401	0.159488	0.786913	0.0887361	0.975803
AllDataSmoteEqual0Point5Erc	DeepFullyConnectedNeuralNetwork_Adagrad_l1_dropoutTrue_numHiddenLayers12	DeepFullyConnectedNeuralNetwork	Adagrad	TRUE	TRUE	12	0.803557	0.879648	0.685622	0.605751	0.762933	0.63884	0.946856	0.731744
AllDataSmoteEqual1Erc	DeepFullyConnectedNeuralNetwork_Adagrad_l1_dropoutTrue_numHiddenLayers12	DeepFullyConnectedNeuralNetwork	Adagrad	TRUE	TRUE	12	0.83091	0.869874	0.797273	0.662084	0.851892	0.756237	0.97525	0.687358
COLAugmentedpositivesx2	DeepFullyConnectedNeuralNetwork_Adagrad_l1_dropoutTrue_numHiddenLayers12	DeepFullyConnectedNeuralNetwork	Adagrad	TRUE	TRUE	12	0.735457	0.828327	0.919933	0.460458	0.779572	0.885689	0.696163	0.815947
ColDataAugmentedDownsampledErc	DeepFullyConnectedNeuralNetwork_Adagrad_l1_dropoutTrue_numHiddenLayers12	DeepFullyConnectedNeuralNetwork	Adagrad	TRUE	TRUE	12	0.497565	0.536065	0.538078	0	0.664499	0.497565	1	0
ColDataImputedSmoteEqual0Point5Erc	DeepFullyConnectedNeuralNetwork_Adagrad_l1_dropoutTrue_numHiddenLayers12	DeepFullyConnectedNeuralNetwork	Adagrad	TRUE	TRUE	12	0.665855	0.781731	0.578355	0	0	0	0	1
ColDataSmoteEqual1Erc	DeepFullyConnectedNeuralNetwork_Adagrad_l1_dropoutTrue_numHiddenLayers12	DeepFullyConnectedNeuralNetwork	Adagrad	TRUE	TRUE	12	0.495003	0.540842	0.565188	0.00561473	0.028878	0.627119	0.0147793	0.990925
DbSmoteEqual0Point5Erc	DeepFullyConnectedNeuralNetwork_Adagrad_l1_dropoutTrue_numHiddenLayers12	DeepFullyConnectedNeuralNetwork	Adagrad	TRUE	TRUE	12	0.639579	0.58628	0.692296	0	0.780175	0.639579	1	0
DbSmoteEqual1Erc	DeepFullyConnectedNeuralNetwork_Adagrad_l1_dropoutTrue_numHiddenLayers12	DeepFullyConnectedNeuralNetwork	Adagrad	TRUE	TRUE	12	0.78105	0.758026	0.908843	0	0.877067	0.78105	1	0
DbSmoteEqual1Erc	DeepFullyConnectedNeuralNetwork_Adagrad_l1_dropoutTrue_numHiddenLayers12	DeepFullyConnectedNeuralNetwork	Adagrad	TRUE	TRUE	12	0.78105	0.764151	0.911632	0	0.877067	0.78105	1	0
DiabeticosImputadoMerged	DeepFullyConnectedNeuralNetwork_Adagrad_l1_dropoutTrue_numHiddenLayers12	DeepFullyConnectedNeuralNetwork	Adagrad	TRUE	TRUE	12	0.637684	0.731521	0.552904	0	0	0	0	1
MergedColombiaImputed	DeepFullyConnectedNeuralNetwork_Adagrad_l1_dropoutTrue_numHiddenLayers12	DeepFullyConnectedNeuralNetwork	Adagrad	TRUE	TRUE	12	0.671464	0.781987	0.591469	0	0	0	0	1
mergedColombiaImputedUpsampled	DeepFullyConnectedNeuralNetwork_Adagrad_l1_dropoutTrue_numHiddenLayers12	DeepFullyConnectedNeuralNetwork	Adagrad	TRUE	TRUE	12	0.686987	0.794075	0.583274	0	0	0	0	1
MergedColombiaImputedUpsampledDownsampled	DeepFullyConnectedNeuralNetwork_Adagrad_l1_dropoutTrue_numHiddenLayers12	DeepFullyConnectedNeuralNetwork	Adagrad	TRUE	TRUE	12	0.668193	0.781954	0.587275	0	0	0	0	1
MergedImputed	DeepFullyConnectedNeuralNetwork_Adagrad_l1_dropoutTrue_numHiddenLayers12	DeepFullyConnectedNeuralNetwork	Adagrad	TRUE	TRUE	12	0.865233	0.90164	0.472452	0	0	0	0	1
MergedImputedUpsampled	DeepFullyConnectedNeuralNetwork_Adagrad_l1_dropoutTrue_numHiddenLayers12	DeepFullyConnectedNeuralNetwork	Adagrad	TRUE	TRUE	12	0.829603	0.876902	0.54328	0	0	0	0	1
MergedImputedUpsampledDownsampled	DeepFullyConnectedNeuralNetwork_Adagrad_l1_dropoutTrue_numHiddenLayers12	DeepFullyConnectedNeuralNetwork	Adagrad	TRUE	TRUE	12	0.825089	0.874614	0.524264	0	0	0	0	1
NdbSmoteEqual1Erc	DeepFullyConnectedNeuralNetwork_Adagrad_l1_dropoutTrue_numHiddenLayers12	DeepFullyConnectedNeuralNetwork	Adagrad	TRUE	TRUE	12	0.840893	0.89091	0.759749	0.685264	0.828033	0.726701	0.962204	0.760656
nodiabeticosMerged	DeepFullyConnectedNeuralNetwork_Adagrad_l1_dropoutTrue_numHiddenLayers12	DeepFullyConnectedNeuralNetwork	Adagrad	TRUE	TRUE	12	0.908907	0.923045	0.484014	0	0	0	0	1
DbSmoteEqual1Erc	DeepFullyConnectedNeuralNetwork_Adagrad_l1_dropoutTrue_numHiddenLayers14	DeepFullyConnectedNeuralNetwork	Adagrad	TRUE	TRUE	14	0.78105	0.744468	0.901772	0	0.877067	0.78105	1	0
DbSmoteEqual1Erc	DeepFullyConnectedNeuralNetwork_Adagrad_l1_dropoutTrue_numHiddenLayers3	DeepFullyConnectedNeuralNetwork	Adagrad	TRUE	TRUE	3	0.78105	0.713428	0.891474	0	0.877067	0.78105	1	0
AllDataAugmentedDownsampledErc	DeepFullyConnectedNeuralNetwork_Adagrad_l1_dropoutTrue_numHiddenLayers5	DeepFullyConnectedNeuralNetwork	Adagrad	TRUE	TRUE	5	0.846813	0.918341	0.895571	0.693399	0.861824	0.787163	0.952132	0.74076
AllDataSmoteEqual0Point5Erc	DeepFullyConnectedNeuralNetwork_Adagrad_l1_dropoutTrue_numHiddenLayers5	DeepFullyConnectedNeuralNetwork	Adagrad	TRUE	TRUE	5	0.827648	0.914699	0.806068	0.6404	0.776605	0.684485	0.897378	0.792704
AllDataSmoteEqual1Erc	DeepFullyConnectedNeuralNetwork_Adagrad_l1_dropoutTrue_numHiddenLayers5	DeepFullyConnectedNeuralNetwork	Adagrad	TRUE	TRUE	5	0.78202	0.889109	0.848861	0.563881	0.766155	0.823686	0.716135	0.847545
COLAugmentedpositivesx2	DeepFullyConnectedNeuralNetwork_Adagrad_l1_dropoutTrue_numHiddenLayers5	DeepFullyConnectedNeuralNetwork	Adagrad	TRUE	TRUE	5	0.759512	0.83331	0.916633	0.471324	0.815454	0.841806	0.790702	0.695621
ColDataAugmentedDownsampledErc	DeepFullyConnectedNeuralNetwork_Adagrad_l1_dropoutTrue_numHiddenLayers5	DeepFullyConnectedNeuralNetwork	Adagrad	TRUE	TRUE	5	0.696327	0.778507	0.755742	0.393429	0.730966	0.653593	0.829119	0.564822
ColDataImputedSmoteEqual0Point5Erc	DeepFullyConnectedNeuralNetwork_Adagrad_l1_dropoutTrue_numHiddenLayers5	DeepFullyConnectedNeuralNetwork	Adagrad	TRUE	TRUE	5	0.747294	0.80763	0.677053	0.4262	0.61389	0.627111	0.601215	0.820601
ColDataSmoteEqual1Erc	DeepFullyConnectedNeuralNetwork_Adagrad_l1_dropoutTrue_numHiddenLayers5	DeepFullyConnectedNeuralNetwork	Adagrad	TRUE	TRUE	5	0.716402	0.788438	0.776653	0.432053	0.729691	0.707388	0.753445	0.678148
DbSmoteEqual0Point5Erc	DeepFullyConnectedNeuralNetwork_Adagrad_l1_dropoutTrue_numHiddenLayers5	DeepFullyConnectedNeuralNetwork	Adagrad	TRUE	TRUE	5	0.709847	0.760402	0.838265	0.361445	0.777313	0.763366	0.791779	0.564456
DbSmoteEqual1Erc	DeepFullyConnectedNeuralNetwork_Adagrad_l1_dropoutTrue_numHiddenLayers5	DeepFullyConnectedNeuralNetwork	Adagrad	TRUE	TRUE	5	0.785928	0.762785	0.911898	0.330095	0.866378	0.845289	0.888546	0.419866
DbSmoteEqual1Erc	DeepFullyConnectedNeuralNetwork_Adagrad_l1_dropoutTrue_numHiddenLayers5	DeepFullyConnectedNeuralNetwork	Adagrad	TRUE	TRUE	5	0.78105	0.765522	0.911426	0	0.877067	0.78105	1	0
DiabeticosImputadoMerged	DeepFullyConnectedNeuralNetwork_Adagrad_l1_dropoutTrue_numHiddenLayers5	DeepFullyConnectedNeuralNetwork	Adagrad	TRUE	TRUE	5	0.718386	0.778513	0.655364	0.389946	0.610462	0.611891	0.60904	0.780514
MergedColombiaImputed	DeepFullyConnectedNeuralNetwork_Adagrad_l1_dropoutTrue_numHiddenLayers5	DeepFullyConnectedNeuralNetwork	Adagrad	TRUE	TRUE	5	0.748727	0.802108	0.65904	0.408082	0.586988	0.63804	0.543501	0.849141
mergedColombiaImputedUpsampled	DeepFullyConnectedNeuralNetwork_Adagrad_l1_dropoutTrue_numHiddenLayers5	DeepFullyConnectedNeuralNetwork	Adagrad	TRUE	TRUE	5	0.75852	0.804418	0.643402	0.376969	0.528753	0.679357	0.432806	0.906925
MergedColombiaImputedUpsampledDownsampled	DeepFullyConnectedNeuralNetwork_Adagrad_l1_dropoutTrue_numHiddenLayers5	DeepFullyConnectedNeuralNetwork	Adagrad	TRUE	TRUE	5	0.745642	0.798208	0.657349	0.403771	0.585494	0.6374	0.541404	0.84706
MergedImputed	DeepFullyConnectedNeuralNetwork_Adagrad_l1_dropoutTrue_numHiddenLayers5	DeepFullyConnectedNeuralNetwork	Adagrad	TRUE	TRUE	5	0.887968	0.926903	0.646245	0.55686	0.621988	0.57034	0.683922	0.91975
MergedImputedUpsampled	DeepFullyConnectedNeuralNetwork_Adagrad_l1_dropoutTrue_numHiddenLayers5	DeepFullyConnectedNeuralNetwork	Adagrad	TRUE	TRUE	5	0.852262	0.877161	0.574252	0.286757	0.346665	0.703281	0.230025	0.980067
MergedImputedUpsampledDownsampled	DeepFullyConnectedNeuralNetwork_Adagrad_l1_dropoutTrue_numHiddenLayers5	DeepFullyConnectedNeuralNetwork	Adagrad	TRUE	TRUE	5	0.847315	0.880784	0.589963	0.462048	0.55411	0.566337	0.5424	0.911953
NdbSmoteEqual1Erc	DeepFullyConnectedNeuralNetwork_Adagrad_l1_dropoutTrue_numHiddenLayers5	DeepFullyConnectedNeuralNetwork	Adagrad	TRUE	TRUE	5	0.803676	0.910273	0.825781	0.576505	0.727098	0.814016	0.65695	0.900723
nodiabeticosMerged	DeepFullyConnectedNeuralNetwork_Adagrad_l1_dropoutTrue_numHiddenLayers5	DeepFullyConnectedNeuralNetwork	Adagrad	TRUE	TRUE	5	0.930815	0.941515	0.633472	0.501004	0.536425	0.688377	0.439427	0.980063
DbSmoteEqual1Erc	DeepFullyConnectedNeuralNetwork_Adagrad_l1_dropoutTrue_numHiddenLayers8	DeepFullyConnectedNeuralNetwork	Adagrad	TRUE	TRUE	8	0.78105	0.758187	0.908549	0	0.877067	0.78105	1	0
AllDataAugmentedDownsampledErc	DeepFullyConnectedNeuralNetwork_RMSprop_l1_dropoutFalse_numHiddenLayers1	DeepFullyConnectedNeuralNetwork	RMSprop	TRUE	FALSE	1	0.84232	0.908413	0.879089	0.684476	0.853549	0.799218	0.915805	0.768322
AllDataSmoteEqual0Point5Erc	DeepFullyConnectedNeuralNetwork_RMSprop_l1_dropoutFalse_numHiddenLayers1	DeepFullyConnectedNeuralNetwork	RMSprop	TRUE	FALSE	1	0.829631	0.903566	0.770381	0.624941	0.755273	0.72559	0.787488	0.850751
AllDataSmoteEqual1Erc	DeepFullyConnectedNeuralNetwork_RMSprop_l1_dropoutFalse_numHiddenLayers1	DeepFullyConnectedNeuralNetwork	RMSprop	TRUE	FALSE	1	0.84515	0.902933	0.866182	0.690423	0.855455	0.80016	0.918959	0.771743
COLAugmentedpositivesx2	DeepFullyConnectedNeuralNetwork_RMSprop_l1_dropoutFalse_numHiddenLayers1	DeepFullyConnectedNeuralNetwork	RMSprop	TRUE	FALSE	1	0.752702	0.820466	0.908303	0.400668	0.826582	0.781587	0.877074	0.497934
ColDataAugmentedDownsampledErc	DeepFullyConnectedNeuralNetwork_RMSprop_l1_dropoutFalse_numHiddenLayers1	DeepFullyConnectedNeuralNetwork	RMSprop	TRUE	FALSE	1	0.670252	0.755473	0.743195	0.339404	0.601129	0.754932	0.499388	0.839459
ColDataImputedSmoteEqual0Point5Erc	DeepFullyConnectedNeuralNetwork_RMSprop_l1_dropoutFalse_numHiddenLayers1	DeepFullyConnectedNeuralNetwork	RMSprop	TRUE	FALSE	1	0.753314	0.807217	0.674167	0.411349	0.582006	0.670806	0.513968	0.873425
ColDataSmoteEqual1Erc	DeepFullyConnectedNeuralNetwork_RMSprop_l1_dropoutFalse_numHiddenLayers1	DeepFullyConnectedNeuralNetwork	RMSprop	TRUE	FALSE	1	0.71072	0.789939	0.776387	0.421983	0.704468	0.732328	0.67865	0.743838
DbSmoteEqual0Point5Erc	DeepFullyConnectedNeuralNetwork_RMSprop_l1_dropoutFalse_numHiddenLayers1	DeepFullyConnectedNeuralNetwork	RMSprop	TRUE	FALSE	1	0.721415	0.764026	0.838125	0.358612	0.797357	0.745514	0.856951	0.480902
DbSmoteEqual1Erc	DeepFullyConnectedNeuralNetwork_RMSprop_l1_dropoutFalse_numHiddenLayers1	DeepFullyConnectedNeuralNetwork	RMSprop	TRUE	FALSE	1	0.781226	0.725184	0.890435	0.0012575	0.877154	0.781188	1	0.000805369
DbSmoteEqual1Erc	DeepFullyConnectedNeuralNetwork_RMSprop_l1_dropoutFalse_numHiddenLayers1	DeepFullyConnectedNeuralNetwork	RMSprop	TRUE	FALSE	1	0.78105	0.745284	0.901675	0	0.877067	0.78105	1	0
DiabeticosImputadoMerged	DeepFullyConnectedNeuralNetwork_RMSprop_l1_dropoutFalse_numHiddenLayers1	DeepFullyConnectedNeuralNetwork	RMSprop	TRUE	FALSE	1	0.718217	0.777325	0.657136	0.370889	0.58139	0.629549	0.540075	0.819433
MergedColombiaImputed	DeepFullyConnectedNeuralNetwork_RMSprop_l1_dropoutFalse_numHiddenLayers1	DeepFullyConnectedNeuralNetwork	RMSprop	TRUE	FALSE	1	0.75219	0.803368	0.65857	0.408945	0.582189	0.652553	0.525522	0.863094
mergedColombiaImputedUpsampled	DeepFullyConnectedNeuralNetwork_RMSprop_l1_dropoutFalse_numHiddenLayers1	DeepFullyConnectedNeuralNetwork	RMSprop	TRUE	FALSE	1	0.751434	0.801233	0.643737	0.327831	0.465279	0.712222	0.34549	0.936395
MergedColombiaImputedUpsampledDownsampled	DeepFullyConnectedNeuralNetwork_RMSprop_l1_dropoutFalse_numHiddenLayers1	DeepFullyConnectedNeuralNetwork	RMSprop	TRUE	FALSE	1	0.746766	0.798134	0.656638	0.400022	0.578046	0.646407	0.52276	0.858002
MergedImputed	DeepFullyConnectedNeuralNetwork_RMSprop_l1_dropoutFalse_numHiddenLayers1	DeepFullyConnectedNeuralNetwork	RMSprop	TRUE	FALSE	1	0.884794	0.911917	0.576957	0.373025	0.429172	0.645859	0.321356	0.972554
MergedImputedUpsampled	DeepFullyConnectedNeuralNetwork_RMSprop_l1_dropoutFalse_numHiddenLayers1	DeepFullyConnectedNeuralNetwork	RMSprop	TRUE	FALSE	1	0.849405	0.876508	0.579602	0.454786	0.544916	0.56168	0.529124	0.915189
MergedImputedUpsampledDownsampled	DeepFullyConnectedNeuralNetwork_RMSprop_l1_dropoutFalse_numHiddenLayers1	DeepFullyConnectedNeuralNetwork	RMSprop	TRUE	FALSE	1	0.853775	0.88092	0.590855	0.431775	0.515306	0.613135	0.4444	0.940558
NdbSmoteEqual1Erc	DeepFullyConnectedNeuralNetwork_RMSprop_l1_dropoutFalse_numHiddenLayers1	DeepFullyConnectedNeuralNetwork	RMSprop	TRUE	FALSE	1	0.816168	0.920077	0.850515	0.603863	0.745298	0.831025	0.675604	0.90914
nodiabeticosMerged	DeepFullyConnectedNeuralNetwork_RMSprop_l1_dropoutFalse_numHiddenLayers1	DeepFullyConnectedNeuralNetwork	RMSprop	TRUE	FALSE	1	0.909266	0.909618	0.508101	0.00714397	0.00785434	1	0.00394265	1
AllDataAugmentedDownsampledErc	DeepFullyConnectedNeuralNetwork_RMSprop_l1_dropoutFalse_numHiddenLayers12	DeepFullyConnectedNeuralNetwork	RMSprop	TRUE	FALSE	12	0.49826	0.826274	0.75988	0	0	0	0	1
AllDataSmoteEqual0Point5Erc	DeepFullyConnectedNeuralNetwork_RMSprop_l1_dropoutFalse_numHiddenLayers12	DeepFullyConnectedNeuralNetwork	RMSprop	TRUE	FALSE	12	0.780288	0.911115	0.796711	0.443214	0.574776	0.812067	0.444803	0.948413
AllDataSmoteEqual1Erc	DeepFullyConnectedNeuralNetwork_RMSprop_l1_dropoutFalse_numHiddenLayers12	DeepFullyConnectedNeuralNetwork	RMSprop	TRUE	FALSE	12	0.779441	0.904823	0.884779	0.558556	0.744735	0.880494	0.645248	0.912901
COLAugmentedpositivesx2	DeepFullyConnectedNeuralNetwork_RMSprop_l1_dropoutFalse_numHiddenLayers12	DeepFullyConnectedNeuralNetwork	RMSprop	TRUE	FALSE	12	0.671963	0.80268	0.888616	0	0.803802	0.671963	1	0
ColDataAugmentedDownsampledErc	DeepFullyConnectedNeuralNetwork_RMSprop_l1_dropoutFalse_numHiddenLayers12	DeepFullyConnectedNeuralNetwork	RMSprop	TRUE	FALSE	12	0.616985	0.714801	0.68439	0.236177	0.704084	0.571883	0.915783	0.321082
ColDataImputedSmoteEqual0Point5Erc	DeepFullyConnectedNeuralNetwork_RMSprop_l1_dropoutFalse_numHiddenLayers12	DeepFullyConnectedNeuralNetwork	RMSprop	TRUE	FALSE	12	0.743777	0.795717	0.640004	0.410464	0.597791	0.628629	0.569838	0.831065
ColDataSmoteEqual1Erc	DeepFullyConnectedNeuralNetwork_RMSprop_l1_dropoutFalse_numHiddenLayers12	DeepFullyConnectedNeuralNetwork	RMSprop	TRUE	FALSE	12	0.680686	0.785229	0.774171	0.364971	0.616126	0.791445	0.504394	0.862741
DbSmoteEqual0Point5Erc	DeepFullyConnectedNeuralNetwork_RMSprop_l1_dropoutFalse_numHiddenLayers12	DeepFullyConnectedNeuralNetwork	RMSprop	TRUE	FALSE	12	0.697992	0.757281	0.835038	0.359724	0.756644	0.780639	0.734081	0.633952
DbSmoteEqual1Erc	DeepFullyConnectedNeuralNetwork_RMSprop_l1_dropoutFalse_numHiddenLayers12	DeepFullyConnectedNeuralNetwork	RMSprop	TRUE	FALSE	12	0.78105	0.5	0.78105	0	0.877067	0.78105	1	0
DbSmoteEqual1Erc	DeepFullyConnectedNeuralNetwork_RMSprop_l1_dropoutFalse_numHiddenLayers12	DeepFullyConnectedNeuralNetwork	RMSprop	TRUE	FALSE	12	0.78105	0.5	0.78105	0	0.877067	0.78105	1	0
DiabeticosImputadoMerged	DeepFullyConnectedNeuralNetwork_RMSprop_l1_dropoutFalse_numHiddenLayers12	DeepFullyConnectedNeuralNetwork	RMSprop	TRUE	FALSE	12	0.709607	0.772407	0.638686	0.382617	0.615213	0.591652	0.640727	0.748742
MergedColombiaImputed	DeepFullyConnectedNeuralNetwork_RMSprop_l1_dropoutFalse_numHiddenLayers12	DeepFullyConnectedNeuralNetwork	RMSprop	TRUE	FALSE	12	0.748523	0.801408	0.657521	0.373408	0.535024	0.681484	0.44038	0.899292
mergedColombiaImputedUpsampled	DeepFullyConnectedNeuralNetwork_RMSprop_l1_dropoutFalse_numHiddenLayers12	DeepFullyConnectedNeuralNetwork	RMSprop	TRUE	FALSE	12	0.759195	0.797488	0.638795	0.372582	0.5206	0.690731	0.417715	0.914784
MergedColombiaImputedUpsampledDownsampled	DeepFullyConnectedNeuralNetwork_RMSprop_l1_dropoutFalse_numHiddenLayers12	DeepFullyConnectedNeuralNetwork	RMSprop	TRUE	FALSE	12	0.739536	0.789685	0.643613	0.354626	0.522252	0.667169	0.429056	0.893712
MergedImputed	DeepFullyConnectedNeuralNetwork_RMSprop_l1_dropoutFalse_numHiddenLayers12	DeepFullyConnectedNeuralNetwork	RMSprop	TRUE	FALSE	12	0.877408	0.907469	0.572173	0.250677	0.296436	0.654193	0.191636	0.984222
MergedImputedUpsampled	DeepFullyConnectedNeuralNetwork_RMSprop_l1_dropoutFalse_numHiddenLayers12	DeepFullyConnectedNeuralNetwork	RMSprop	TRUE	FALSE	12	0.855592	0.874192	0.565187	0.34764	0.417029	0.668074	0.303123	0.969067
MergedImputedUpsampledDownsampled	DeepFullyConnectedNeuralNetwork_RMSprop_l1_dropoutFalse_numHiddenLayers12	DeepFullyConnectedNeuralNetwork	RMSprop	TRUE	FALSE	12	0.855151	0.880021	0.58933	0.383784	0.458359	0.662465	0.3504	0.962153
NdbSmoteEqual1Erc	DeepFullyConnectedNeuralNetwork_RMSprop_l1_dropoutFalse_numHiddenLayers12	DeepFullyConnectedNeuralNetwork	RMSprop	TRUE	FALSE	12	0.649375	0.915239	0.867778	0.142813	0.223894	0.942315	0.127039	0.994856
nodiabeticosMerged	DeepFullyConnectedNeuralNetwork_RMSprop_l1_dropoutFalse_numHiddenLayers12	DeepFullyConnectedNeuralNetwork	RMSprop	TRUE	FALSE	12	0.926081	0.918811	0.603981	0.511541	0.551328	0.616578	0.498566	0.968927
DbSmoteEqual1Erc	DeepFullyConnectedNeuralNetwork_RMSprop_l1_dropoutFalse_numHiddenLayers14	DeepFullyConnectedNeuralNetwork	RMSprop	TRUE	FALSE	14	0.78105	0.758294	0.907281	0	0.877067	0.78105	1	0
DbSmoteEqual1Erc	DeepFullyConnectedNeuralNetwork_RMSprop_l1_dropoutFalse_numHiddenLayers3	DeepFullyConnectedNeuralNetwork	RMSprop	TRUE	FALSE	3	0.781931	0.754398	0.905569	0.00627613	0.877501	0.781739	1	0.00402685
AllDataAugmentedDownsampledErc	DeepFullyConnectedNeuralNetwork_RMSprop_l1_dropoutFalse_numHiddenLayers5	DeepFullyConnectedNeuralNetwork	RMSprop	TRUE	FALSE	5	0.835548	0.898356	0.860952	0.670851	0.851705	0.777737	0.941221	0.729138
AllDataSmoteEqual0Point5Erc	DeepFullyConnectedNeuralNetwork_RMSprop_l1_dropoutFalse_numHiddenLayers5	DeepFullyConnectedNeuralNetwork	RMSprop	TRUE	FALSE	5	0.838027	0.914913	0.809632	0.642442	0.766072	0.73966	0.794439	0.859871
AllDataSmoteEqual1Erc	DeepFullyConnectedNeuralNetwork_RMSprop_l1_dropoutFalse_numHiddenLayers5	DeepFullyConnectedNeuralNetwork	RMSprop	TRUE	FALSE	5	0.845624	0.912788	0.882741	0.691351	0.854262	0.807022	0.907377	0.784209
COLAugmentedpositivesx2	DeepFullyConnectedNeuralNetwork_RMSprop_l1_dropoutFalse_numHiddenLayers5	DeepFullyConnectedNeuralNetwork	RMSprop	TRUE	FALSE	5	0.674504	0.79264	0.887715	0.0118532	0.804859	0.673923	0.998941	0.00991531
ColDataAugmentedDownsampledErc	DeepFullyConnectedNeuralNetwork_RMSprop_l1_dropoutFalse_numHiddenLayers5	DeepFullyConnectedNeuralNetwork	RMSprop	TRUE	FALSE	5	0.706169	0.780414	0.761506	0.412083	0.691718	0.723608	0.66252	0.749394
ColDataImputedSmoteEqual0Point5Erc	DeepFullyConnectedNeuralNetwork_RMSprop_l1_dropoutFalse_numHiddenLayers5	DeepFullyConnectedNeuralNetwork	RMSprop	TRUE	FALSE	5	0.750338	0.806809	0.67392	0.418871	0.598586	0.646769	0.557085	0.847318
ColDataSmoteEqual1Erc	DeepFullyConnectedNeuralNetwork_RMSprop_l1_dropoutFalse_numHiddenLayers5	DeepFullyConnectedNeuralNetwork	RMSprop	TRUE	FALSE	5	0.710416	0.782681	0.769943	0.420978	0.71046	0.721959	0.699321	0.721873
DbSmoteEqual0Point5Erc	DeepFullyConnectedNeuralNetwork_RMSprop_l1_dropoutFalse_numHiddenLayers5	DeepFullyConnectedNeuralNetwork	RMSprop	TRUE	FALSE	5	0.716922	0.759312	0.834586	0.364472	0.78797	0.756289	0.822422	0.529708
DbSmoteEqual1Erc	DeepFullyConnectedNeuralNetwork_RMSprop_l1_dropoutFalse_numHiddenLayers5	DeepFullyConnectedNeuralNetwork	RMSprop	TRUE	FALSE	5	0.78105	0.752144	0.904307	0	0.877067	0.78105	1	0
DbSmoteEqual1Erc	DeepFullyConnectedNeuralNetwork_RMSprop_l1_dropoutFalse_numHiddenLayers5	DeepFullyConnectedNeuralNetwork	RMSprop	TRUE	FALSE	5	0.78105	0.645745	0.85855	0	0.877067	0.78105	1	0
DiabeticosImputadoMerged	DeepFullyConnectedNeuralNetwork_RMSprop_l1_dropoutFalse_numHiddenLayers5	DeepFullyConnectedNeuralNetwork	RMSprop	TRUE	FALSE	5	0.721931	0.778292	0.649108	0.383279	0.593434	0.630971	0.560112	0.813873
MergedColombiaImputed	DeepFullyConnectedNeuralNetwork_RMSprop_l1_dropoutFalse_numHiddenLayers5	DeepFullyConnectedNeuralNetwork	RMSprop	TRUE	FALSE	5	0.750017	0.800861	0.657771	0.3916	0.560411	0.663557	0.485018	0.879676
mergedColombiaImputedUpsampled	DeepFullyConnectedNeuralNetwork_RMSprop_l1_dropoutFalse_numHiddenLayers5	DeepFullyConnectedNeuralNetwork	RMSprop	TRUE	FALSE	5	0.759307	0.804164	0.644555	0.389273	0.545744	0.666753	0.461912	0.89481
MergedColombiaImputedUpsampledDownsampled	DeepFullyConnectedNeuralNetwork_RMSprop_l1_dropoutFalse_numHiddenLayers5	DeepFullyConnectedNeuralNetwork	RMSprop	TRUE	FALSE	5	0.742589	0.797426	0.655167	0.417002	0.608791	0.614039	0.603632	0.811591
MergedImputed	DeepFullyConnectedNeuralNetwork_RMSprop_l1_dropoutFalse_numHiddenLayers5	DeepFullyConnectedNeuralNetwork	RMSprop	TRUE	FALSE	5	0.872975	0.913006	0.54161	0.504607	0.578407	0.523246	0.646569	0.90824
MergedImputedUpsampled	DeepFullyConnectedNeuralNetwork_RMSprop_l1_dropoutFalse_numHiddenLayers5	DeepFullyConnectedNeuralNetwork	RMSprop	TRUE	FALSE	5	0.857633	0.87798	0.568952	0.365465	0.435644	0.671186	0.322476	0.967552
MergedImputedUpsampledDownsampled	DeepFullyConnectedNeuralNetwork_RMSprop_l1_dropoutFalse_numHiddenLayers5	DeepFullyConnectedNeuralNetwork	RMSprop	TRUE	FALSE	5	0.852375	0.879673	0.586603	0.324902	0.390526	0.702703	0.2704	0.975748
NdbSmoteEqual1Erc	DeepFullyConnectedNeuralNetwork_RMSprop_l1_dropoutFalse_numHiddenLayers5	DeepFullyConnectedNeuralNetwork	RMSprop	TRUE	FALSE	5	0.862954	0.934431	0.878279	0.71974	0.837642	0.79267	0.888025	0.846372
nodiabeticosMerged	DeepFullyConnectedNeuralNetwork_RMSprop_l1_dropoutFalse_numHiddenLayers5	DeepFullyConnectedNeuralNetwork	RMSprop	TRUE	FALSE	5	0.909723	0.937547	0.619294	0.0178849	0.0198511	0.903226	0.0100358	0.999892
DbSmoteEqual1Erc	DeepFullyConnectedNeuralNetwork_RMSprop_l1_dropoutFalse_numHiddenLayers8	DeepFullyConnectedNeuralNetwork	RMSprop	TRUE	FALSE	8	0.805972	0.763433	0.910293	0.255021	0.886349	0.816907	0.968694	0.225503
AllDataAugmentedDownsampledErc	DeepFullyConnectedNeuralNetwork_RMSprop_l1_dropoutTrue_numHiddenLayers1	DeepFullyConnectedNeuralNetwork	RMSprop	TRUE	TRUE	1	0.810234	0.903908	0.876259	0.620558	0.803821	0.835044	0.774849	0.845866
AllDataSmoteEqual0Point5Erc	DeepFullyConnectedNeuralNetwork_RMSprop_l1_dropoutTrue_numHiddenLayers1	DeepFullyConnectedNeuralNetwork	RMSprop	TRUE	TRUE	1	0.794507	0.889139	0.735389	0.521355	0.66918	0.723348	0.622559	0.880676
AllDataSmoteEqual1Erc	DeepFullyConnectedNeuralNetwork_RMSprop_l1_dropoutTrue_numHiddenLayers1	DeepFullyConnectedNeuralNetwork	RMSprop	TRUE	TRUE	1	0.837761	0.898395	0.861482	0.675634	0.847238	0.798534	0.902269	0.773605
COLAugmentedpositivesx2	DeepFullyConnectedNeuralNetwork_RMSprop_l1_dropoutTrue_numHiddenLayers1	DeepFullyConnectedNeuralNetwork	RMSprop	TRUE	TRUE	1	0.731526	0.802691	0.899898	0.324531	0.817377	0.75277	0.894116	0.398471
ColDataAugmentedDownsampledErc	DeepFullyConnectedNeuralNetwork_RMSprop_l1_dropoutTrue_numHiddenLayers1	DeepFullyConnectedNeuralNetwork	RMSprop	TRUE	TRUE	1	0.678774	0.744997	0.710938	0.357488	0.674815	0.679843	0.669861	0.687601
ColDataImputedSmoteEqual0Point5Erc	DeepFullyConnectedNeuralNetwork_RMSprop_l1_dropoutTrue_numHiddenLayers1	DeepFullyConnectedNeuralNetwork	RMSprop	TRUE	TRUE	1	0.753044	0.805279	0.673414	0.406189	0.574624	0.676915	0.49919	0.880435
ColDataSmoteEqual1Erc	DeepFullyConnectedNeuralNetwork_RMSprop_l1_dropoutTrue_numHiddenLayers1	DeepFullyConnectedNeuralNetwork	RMSprop	TRUE	TRUE	1	0.700624	0.785995	0.776906	0.403006	0.673346	0.755434	0.60735	0.796948
DbSmoteEqual0Point5Erc	DeepFullyConnectedNeuralNetwork_RMSprop_l1_dropoutTrue_numHiddenLayers1	DeepFullyConnectedNeuralNetwork	RMSprop	TRUE	TRUE	1	0.699426	0.751936	0.833064	0.348725	0.764706	0.765737	0.763677	0.585411
DbSmoteEqual1Erc	DeepFullyConnectedNeuralNetwork_RMSprop_l1_dropoutTrue_numHiddenLayers1	DeepFullyConnectedNeuralNetwork	RMSprop	TRUE	TRUE	1	0.783342	0.725141	0.89235	0.0253247	0.877947	0.783881	0.997667	0.0187919
DbSmoteEqual1Erc	DeepFullyConnectedNeuralNetwork_RMSprop_l1_dropoutTrue_numHiddenLayers1	DeepFullyConnectedNeuralNetwork	RMSprop	TRUE	TRUE	1	0.78105	0.70769	0.884166	0	0.877067	0.78105	1	0
DiabeticosImputadoMerged	DeepFullyConnectedNeuralNetwork_RMSprop_l1_dropoutTrue_numHiddenLayers1	DeepFullyConnectedNeuralNetwork	RMSprop	TRUE	TRUE	1	0.716866	0.77457	0.653598	0.362581	0.57077	0.633163	0.519571	0.828965
MergedColombiaImputed	DeepFullyConnectedNeuralNetwork_RMSprop_l1_dropoutTrue_numHiddenLayers1	DeepFullyConnectedNeuralNetwork	RMSprop	TRUE	TRUE	1	0.749542	0.802119	0.657855	0.391994	0.561929	0.660525	0.488944	0.877048
mergedColombiaImputedUpsampled	DeepFullyConnectedNeuralNetwork_RMSprop_l1_dropoutTrue_numHiddenLayers1	DeepFullyConnectedNeuralNetwork	RMSprop	TRUE	TRUE	1	0.755933	0.800189	0.640818	0.40491	0.573841	0.632741	0.524973	0.861166
MergedColombiaImputedUpsampledDownsampled	DeepFullyConnectedNeuralNetwork_RMSprop_l1_dropoutTrue_numHiddenLayers1	DeepFullyConnectedNeuralNetwork	RMSprop	TRUE	TRUE	1	0.741866	0.793676	0.6515	0.414396	0.606395	0.613687	0.599274	0.812673
MergedImputed	DeepFullyConnectedNeuralNetwork_RMSprop_l1_dropoutTrue_numHiddenLayers1	DeepFullyConnectedNeuralNetwork	RMSprop	TRUE	TRUE	1	0.867449	0.880977	0.47095	0.26226	0.32455	0.518024	0.236297	0.965756
MergedImputedUpsampled	DeepFullyConnectedNeuralNetwork_RMSprop_l1_dropoutTrue_numHiddenLayers1	DeepFullyConnectedNeuralNetwork	RMSprop	TRUE	TRUE	1	0.847332	0.862218	0.538681	0.248352	0.306129	0.678618	0.197643	0.980775
MergedImputedUpsampledDownsampled	DeepFullyConnectedNeuralNetwork_RMSprop_l1_dropoutTrue_numHiddenLayers1	DeepFullyConnectedNeuralNetwork	RMSprop	TRUE	TRUE	1	0.851839	0.873898	0.573751	0.355732	0.429252	0.657945	0.318533	0.964894
NdbSmoteEqual1Erc	DeepFullyConnectedNeuralNetwork_RMSprop_l1_dropoutTrue_numHiddenLayers1	DeepFullyConnectedNeuralNetwork	RMSprop	TRUE	TRUE	1	0.788305	0.91702	0.842269	0.533399	0.684459	0.841667	0.576735	0.92824
nodiabeticosMerged	DeepFullyConnectedNeuralNetwork_RMSprop_l1_dropoutTrue_numHiddenLayers1	DeepFullyConnectedNeuralNetwork	RMSprop	TRUE	TRUE	1	0.908907	0.888491	0.494563	0	0	0	0	1
AllDataAugmentedDownsampledErc	DeepFullyConnectedNeuralNetwork_RMSprop_l1_dropoutTrue_numHiddenLayers12	DeepFullyConnectedNeuralNetwork	RMSprop	TRUE	TRUE	12	0.784982	0.883246	0.847334	0.570042	0.779605	0.802538	0.757947	0.812206
AllDataSmoteEqual0Point5Erc	DeepFullyConnectedNeuralNetwork_RMSprop_l1_dropoutTrue_numHiddenLayers12	DeepFullyConnectedNeuralNetwork	RMSprop	TRUE	TRUE	12	0.66616	0.878247	0.704958	0	0	0	0	1
AllDataSmoteEqual1Erc	DeepFullyConnectedNeuralNetwork_RMSprop_l1_dropoutTrue_numHiddenLayers12	DeepFullyConnectedNeuralNetwork	RMSprop	TRUE	TRUE	12	0.501369	0.855332	0.780856	0	0	0	0	1
COLAugmentedpositivesx2	DeepFullyConnectedNeuralNetwork_RMSprop_l1_dropoutTrue_numHiddenLayers12	DeepFullyConnectedNeuralNetwork	RMSprop	TRUE	TRUE	12	0.671963	0.775065	0.864054	0	0.803802	0.671963	1	0
ColDataAugmentedDownsampledErc	DeepFullyConnectedNeuralNetwork_RMSprop_l1_dropoutTrue_numHiddenLayers12	DeepFullyConnectedNeuralNetwork	RMSprop	TRUE	TRUE	12	0.497565	0.5	0.497565	0	0.664499	0.497565	1	0
ColDataImputedSmoteEqual0Point5Erc	DeepFullyConnectedNeuralNetwork_RMSprop_l1_dropoutTrue_numHiddenLayers12	DeepFullyConnectedNeuralNetwork	RMSprop	TRUE	TRUE	12	0.703463	0.763836	0.557118	0.384728	0.619709	0.542198	0.723077	0.69362
ColDataSmoteEqual1Erc	DeepFullyConnectedNeuralNetwork_RMSprop_l1_dropoutTrue_numHiddenLayers12	DeepFullyConnectedNeuralNetwork	RMSprop	TRUE	TRUE	12	0.491959	0.69609	0.648698	0	0	0	0	1
DbSmoteEqual0Point5Erc	DeepFullyConnectedNeuralNetwork_RMSprop_l1_dropoutTrue_numHiddenLayers12	DeepFullyConnectedNeuralNetwork	RMSprop	TRUE	TRUE	12	0.639579	0.641187	0.756739	0	0.780175	0.639579	1	0
DbSmoteEqual1Erc	DeepFullyConnectedNeuralNetwork_RMSprop_l1_dropoutTrue_numHiddenLayers12	DeepFullyConnectedNeuralNetwork	RMSprop	TRUE	TRUE	12	0.78105	0.750254	0.903553	0	0.877067	0.78105	1	0
DbSmoteEqual1Erc	DeepFullyConnectedNeuralNetwork_RMSprop_l1_dropoutTrue_numHiddenLayers12	DeepFullyConnectedNeuralNetwork	RMSprop	TRUE	TRUE	12	0.78105	0.629274	0.852691	0	0.877067	0.78105	1	0
DiabeticosImputadoMerged	DeepFullyConnectedNeuralNetwork_RMSprop_l1_dropoutTrue_numHiddenLayers12	DeepFullyConnectedNeuralNetwork	RMSprop	TRUE	TRUE	12	0.637684	0.763729	0.64775	0	0	0	0	1
MergedColombiaImputed	DeepFullyConnectedNeuralNetwork_RMSprop_l1_dropoutTrue_numHiddenLayers12	DeepFullyConnectedNeuralNetwork	RMSprop	TRUE	TRUE	12	0.715052	0.760735	0.54874	0.380219	0.599332	0.556955	0.648688	0.747523
mergedColombiaImputedUpsampled	DeepFullyConnectedNeuralNetwork_RMSprop_l1_dropoutTrue_numHiddenLayers12	DeepFullyConnectedNeuralNetwork	RMSprop	TRUE	TRUE	12	0.686987	0.760137	0.560061	0	0	0	0	1
MergedColombiaImputedUpsampledDownsampled	DeepFullyConnectedNeuralNetwork_RMSprop_l1_dropoutTrue_numHiddenLayers12	DeepFullyConnectedNeuralNetwork	RMSprop	TRUE	TRUE	12	0.728208	0.781713	0.627338	0.407042	0.616135	0.579757	0.657385	0.763376
MergedImputed	DeepFullyConnectedNeuralNetwork_RMSprop_l1_dropoutTrue_numHiddenLayers12	DeepFullyConnectedNeuralNetwork	RMSprop	TRUE	TRUE	12	0.865233	0.904485	0.496591	0	0	0	0	1
MergedImputedUpsampled	DeepFullyConnectedNeuralNetwork_RMSprop_l1_dropoutTrue_numHiddenLayers12	DeepFullyConnectedNeuralNetwork	RMSprop	TRUE	TRUE	12	0.829603	0.846547	0.471589	0	0	0	0	1
MergedImputedUpsampledDownsampled	DeepFullyConnectedNeuralNetwork_RMSprop_l1_dropoutTrue_numHiddenLayers12	DeepFullyConnectedNeuralNetwork	RMSprop	TRUE	TRUE	12	0.825089	0.860136	0.512751	0	0	0	0	1
NdbSmoteEqual1Erc	DeepFullyConnectedNeuralNetwork_RMSprop_l1_dropoutTrue_numHiddenLayers12	DeepFullyConnectedNeuralNetwork	RMSprop	TRUE	TRUE	12	0.601897	0.914148	0.846026	0	0	0	0	1
nodiabeticosMerged	DeepFullyConnectedNeuralNetwork_RMSprop_l1_dropoutTrue_numHiddenLayers12	DeepFullyConnectedNeuralNetwork	RMSprop	TRUE	TRUE	12	0.908907	0.92537	0.600619	0	0	0	0	1
DbSmoteEqual1Erc	DeepFullyConnectedNeuralNetwork_RMSprop_l1_dropoutTrue_numHiddenLayers14	DeepFullyConnectedNeuralNetwork	RMSprop	TRUE	TRUE	14	0.78105	0.754853	0.907476	0	0.877067	0.78105	1	0
DbSmoteEqual1Erc	DeepFullyConnectedNeuralNetwork_RMSprop_l1_dropoutTrue_numHiddenLayers3	DeepFullyConnectedNeuralNetwork	RMSprop	TRUE	TRUE	3	0.78105	0.670548	0.871499	0	0.877067	0.78105	1	0
AllDataAugmentedDownsampledErc	DeepFullyConnectedNeuralNetwork_RMSprop_l1_dropoutTrue_numHiddenLayers5	DeepFullyConnectedNeuralNetwork	RMSprop	TRUE	TRUE	5	0.830296	0.901405	0.869569	0.660427	0.841552	0.791618	0.898209	0.761908
AllDataSmoteEqual0Point5Erc	DeepFullyConnectedNeuralNetwork_RMSprop_l1_dropoutTrue_numHiddenLayers5	DeepFullyConnectedNeuralNetwork	RMSprop	TRUE	TRUE	5	0.797987	0.903055	0.77739	0.507702	0.641858	0.78631	0.542243	0.926151
AllDataSmoteEqual1Erc	DeepFullyConnectedNeuralNetwork_RMSprop_l1_dropoutTrue_numHiddenLayers5	DeepFullyConnectedNeuralNetwork	RMSprop	TRUE	TRUE	5	0.644099	0.889047	0.872487	0.286892	0.463995	0.931585	0.308932	0.977436
COLAugmentedpositivesx2	DeepFullyConnectedNeuralNetwork_RMSprop_l1_dropoutTrue_numHiddenLayers5	DeepFullyConnectedNeuralNetwork	RMSprop	TRUE	TRUE	5	0.671963	0.812214	0.905034	0	0.803802	0.671963	1	0
ColDataAugmentedDownsampledErc	DeepFullyConnectedNeuralNetwork_RMSprop_l1_dropoutTrue_numHiddenLayers5	DeepFullyConnectedNeuralNetwork	RMSprop	TRUE	TRUE	5	0.526786	0.71908	0.682043	0.0494494	0.143277	0.722222	0.0795269	0.969709
ColDataImputedSmoteEqual0Point5Erc	DeepFullyConnectedNeuralNetwork_RMSprop_l1_dropoutTrue_numHiddenLayers5	DeepFullyConnectedNeuralNetwork	RMSprop	TRUE	TRUE	5	0.722876	0.794207	0.663206	0.411276	0.628457	0.569246	0.701417	0.733645
ColDataSmoteEqual1Erc	DeepFullyConnectedNeuralNetwork_RMSprop_l1_dropoutTrue_numHiddenLayers5	DeepFullyConnectedNeuralNetwork	RMSprop	TRUE	TRUE	5	0.495054	0.771303	0.758718	0.00597813	0.0130887	0.929577	0.00659077	0.999484
DbSmoteEqual0Point5Erc	DeepFullyConnectedNeuralNetwork_RMSprop_l1_dropoutTrue_numHiddenLayers5	DeepFullyConnectedNeuralNetwork	RMSprop	TRUE	TRUE	5	0.645889	0.761382	0.840519	0.321962	0.665885	0.839627	0.551719	0.812997
DbSmoteEqual1Erc	DeepFullyConnectedNeuralNetwork_RMSprop_l1_dropoutTrue_numHiddenLayers5	DeepFullyConnectedNeuralNetwork	RMSprop	TRUE	TRUE	5	0.78105	0.705074	0.882047	0	0.877067	0.78105	1	0
DbSmoteEqual1Erc	DeepFullyConnectedNeuralNetwork_RMSprop_l1_dropoutTrue_numHiddenLayers5	DeepFullyConnectedNeuralNetwork	RMSprop	TRUE	TRUE	5	0.78105	0.755014	0.908302	0	0.877067	0.78105	1	0
DiabeticosImputadoMerged	DeepFullyConnectedNeuralNetwork_RMSprop_l1_dropoutTrue_numHiddenLayers5	DeepFullyConnectedNeuralNetwork	RMSprop	TRUE	TRUE	5	0.704035	0.76105	0.632766	0.35685	0.587626	0.593349	0.582013	0.773365
MergedColombiaImputed	DeepFullyConnectedNeuralNetwork_RMSprop_l1_dropoutTrue_numHiddenLayers5	DeepFullyConnectedNeuralNetwork	RMSprop	TRUE	TRUE	5	0.733044	0.789743	0.647643	0.409818	0.61284	0.585292	0.643108	0.777048
mergedColombiaImputedUpsampled	DeepFullyConnectedNeuralNetwork_RMSprop_l1_dropoutTrue_numHiddenLayers5	DeepFullyConnectedNeuralNetwork	RMSprop	TRUE	TRUE	5	0.753234	0.792428	0.624049	0.359507	0.512553	0.67142	0.414481	0.90758
MergedColombiaImputedUpsampledDownsampled	DeepFullyConnectedNeuralNetwork_RMSprop_l1_dropoutTrue_numHiddenLayers5	DeepFullyConnectedNeuralNetwork	RMSprop	TRUE	TRUE	5	0.740419	0.783062	0.642515	0.346532	0.506793	0.685667	0.401937	0.908501
MergedImputed	DeepFullyConnectedNeuralNetwork_RMSprop_l1_dropoutTrue_numHiddenLayers5	DeepFullyConnectedNeuralNetwork	RMSprop	TRUE	TRUE	5	0.864631	0.913881	0.615972	0.526233	0.603526	0.498544	0.764515	0.880225
MergedImputedUpsampled	DeepFullyConnectedNeuralNetwork_RMSprop_l1_dropoutTrue_numHiddenLayers5	DeepFullyConnectedNeuralNetwork	RMSprop	TRUE	TRUE	5	0.840345	0.848864	0.501575	0.372424	0.463933	0.542147	0.405442	0.929672
MergedImputedUpsampledDownsampled	DeepFullyConnectedNeuralNetwork_RMSprop_l1_dropoutTrue_numHiddenLayers5	DeepFullyConnectedNeuralNetwork	RMSprop	TRUE	TRUE	5	0.832809	0.847328	0.480768	0.314559	0.405112	0.536366	0.325467	0.94036
NdbSmoteEqual1Erc	DeepFullyConnectedNeuralNetwork_RMSprop_l1_dropoutTrue_numHiddenLayers5	DeepFullyConnectedNeuralNetwork	RMSprop	TRUE	TRUE	5	0.852865	0.926795	0.854623	0.705953	0.836509	0.750043	0.945508	0.79159
nodiabeticosMerged	DeepFullyConnectedNeuralNetwork_RMSprop_l1_dropoutTrue_numHiddenLayers5	DeepFullyConnectedNeuralNetwork	RMSprop	TRUE	TRUE	5	0.910964	0.932508	0.616536	0.53562	0.584235	0.508358	0.686738	0.933436
DbSmoteEqual1Erc	DeepFullyConnectedNeuralNetwork_RMSprop_l1_dropoutTrue_numHiddenLayers8	DeepFullyConnectedNeuralNetwork	RMSprop	TRUE	TRUE	8	0.78105	0.752438	0.906571	0	0.877067	0.78105	1	0
AllDataAugmentedDownsampledErc	DeepFullyConnectedNeuralNetwork_SGD_l1_dropoutFalse_numHiddenLayers1	DeepFullyConnectedNeuralNetwork	SGD	TRUE	FALSE	1	0.841909	0.905899	0.87942	0.683664	0.852451	0.8016	0.910192	0.773149
AllDataSmoteEqual0Point5Erc	DeepFullyConnectedNeuralNetwork_SGD_l1_dropoutFalse_numHiddenLayers1	DeepFullyConnectedNeuralNetwork	SGD	TRUE	FALSE	1	0.804865	0.891545	0.755769	0.581024	0.732968	0.674728	0.802212	0.806194
AllDataSmoteEqual1Erc	DeepFullyConnectedNeuralNetwork_SGD_l1_dropoutFalse_numHiddenLayers1	DeepFullyConnectedNeuralNetwork	SGD	TRUE	FALSE	1	0.83072	0.898965	0.864214	0.66154	0.839168	0.797303	0.885673	0.776067
COLAugmentedpositivesx2	DeepFullyConnectedNeuralNetwork_SGD_l1_dropoutFalse_numHiddenLayers1	DeepFullyConnectedNeuralNetwork	SGD	TRUE	FALSE	1	0.691614	0.806466	0.899851	0.0935841	0.811561	0.688468	0.988252	0.0839703
ColDataAugmentedDownsampledErc	DeepFullyConnectedNeuralNetwork_SGD_l1_dropoutFalse_numHiddenLayers1	DeepFullyConnectedNeuralNetwork	SGD	TRUE	FALSE	1	0.497666	0.770167	0.74545	0.000200955	0.664544	0.497615	1	0.000201939
ColDataImputedSmoteEqual0Point5Erc	DeepFullyConnectedNeuralNetwork_SGD_l1_dropoutFalse_numHiddenLayers1	DeepFullyConnectedNeuralNetwork	SGD	TRUE	FALSE	1	0.753314	0.809044	0.677314	0.428841	0.607723	0.648382	0.571862	0.844372
ColDataSmoteEqual1Erc	DeepFullyConnectedNeuralNetwork_SGD_l1_dropoutFalse_numHiddenLayers1	DeepFullyConnectedNeuralNetwork	SGD	TRUE	FALSE	1	0.692304	0.760266	0.744542	0.38334	0.712954	0.677643	0.752147	0.630504
DbSmoteEqual0Point5Erc	DeepFullyConnectedNeuralNetwork_SGD_l1_dropoutFalse_numHiddenLayers1	DeepFullyConnectedNeuralNetwork	SGD	TRUE	FALSE	1	0.714723	0.765533	0.840986	0.291486	0.808325	0.708718	0.940508	0.314058
DbSmoteEqual1Erc	DeepFullyConnectedNeuralNetwork_SGD_l1_dropoutFalse_numHiddenLayers1	DeepFullyConnectedNeuralNetwork	SGD	TRUE	FALSE	1	0.78152	0.73112	0.900174	0.0033508	0.877298	0.781417	1	0.00214765
DbSmoteEqual1Erc	DeepFullyConnectedNeuralNetwork_SGD_l1_dropoutFalse_numHiddenLayers1	DeepFullyConnectedNeuralNetwork	SGD	TRUE	FALSE	1	0.80221	0.77193	0.913718	0.32164	0.880262	0.834897	0.93084	0.343356
DiabeticosImputadoMerged	DeepFullyConnectedNeuralNetwork_SGD_l1_dropoutFalse_numHiddenLayers1	DeepFullyConnectedNeuralNetwork	SGD	TRUE	FALSE	1	0.721256	0.781342	0.659801	0.38734	0.601111	0.624185	0.579683	0.801694
MergedColombiaImputed	DeepFullyConnectedNeuralNetwork_SGD_l1_dropoutFalse_numHiddenLayers1	DeepFullyConnectedNeuralNetwork	SGD	TRUE	FALSE	1	0.749202	0.804049	0.658395	0.409558	0.588275	0.638519	0.545361	0.848938
mergedColombiaImputedUpsampled	DeepFullyConnectedNeuralNetwork_SGD_l1_dropoutFalse_numHiddenLayers1	DeepFullyConnectedNeuralNetwork	SGD	TRUE	FALSE	1	0.756945	0.802001	0.643981	0.407317	0.575525	0.634749	0.52641	0.861984
MergedColombiaImputedUpsampledDownsampled	DeepFullyConnectedNeuralNetwork_SGD_l1_dropoutFalse_numHiddenLayers1	DeepFullyConnectedNeuralNetwork	SGD	TRUE	FALSE	1	0.750301	0.799031	0.656762	0.393962	0.56213	0.67217	0.483051	0.883011
MergedImputed	DeepFullyConnectedNeuralNetwork_SGD_l1_dropoutFalse_numHiddenLayers1	DeepFullyConnectedNeuralNetwork	SGD	TRUE	FALSE	1	0.897844	0.927341	0.650522	0.531441	0.589309	0.643063	0.543849	0.952982
MergedImputedUpsampled	DeepFullyConnectedNeuralNetwork_SGD_l1_dropoutFalse_numHiddenLayers1	DeepFullyConnectedNeuralNetwork	SGD	TRUE	FALSE	1	0.852866	0.877214	0.581826	0.45093	0.537913	0.578582	0.502587	0.924812
MergedImputedUpsampledDownsampled	DeepFullyConnectedNeuralNetwork_SGD_l1_dropoutFalse_numHiddenLayers1	DeepFullyConnectedNeuralNetwork	SGD	TRUE	FALSE	1	0.854964	0.880126	0.589652	0.364713	0.435714	0.681909	0.320133	0.968343
NdbSmoteEqual1Erc	DeepFullyConnectedNeuralNetwork_SGD_l1_dropoutFalse_numHiddenLayers1	DeepFullyConnectedNeuralNetwork	SGD	TRUE	FALSE	1	0.848817	0.923436	0.861753	0.688798	0.817509	0.786889	0.850609	0.847631
nodiabeticosMerged	DeepFullyConnectedNeuralNetwork_SGD_l1_dropoutFalse_numHiddenLayers1	DeepFullyConnectedNeuralNetwork	SGD	TRUE	FALSE	1	0.931664	0.94452	0.649058	0.533538	0.569784	0.667952	0.496774	0.97525
AllDataAugmentedDownsampledErc	DeepFullyConnectedNeuralNetwork_SGD_l1_dropoutFalse_numHiddenLayers12	DeepFullyConnectedNeuralNetwork	SGD	TRUE	FALSE	12	0.579204	0.878884	0.845561	0.155935	0.704187	0.543955	0.998234	0.157246
AllDataSmoteEqual0Point5Erc	DeepFullyConnectedNeuralNetwork_SGD_l1_dropoutFalse_numHiddenLayers12	DeepFullyConnectedNeuralNetwork	SGD	TRUE	FALSE	12	0.762568	0.873785	0.714953	0.422007	0.580053	0.708181	0.491185	0.898569
AllDataSmoteEqual1Erc	DeepFullyConnectedNeuralNetwork_SGD_l1_dropoutFalse_numHiddenLayers12	DeepFullyConnectedNeuralNetwork	SGD	TRUE	FALSE	12	0.501369	0.894505	0.855551	0	0	0	0	1
COLAugmentedpositivesx2	DeepFullyConnectedNeuralNetwork_SGD_l1_dropoutFalse_numHiddenLayers12	DeepFullyConnectedNeuralNetwork	SGD	TRUE	FALSE	12	0.671963	0.732531	0.845156	0	0.803802	0.671963	1	0
ColDataAugmentedDownsampledErc	DeepFullyConnectedNeuralNetwork_SGD_l1_dropoutFalse_numHiddenLayers12	DeepFullyConnectedNeuralNetwork	SGD	TRUE	FALSE	12	0.615564	0.654919	0.602162	0.232653	0.680064	0.580343	0.821166	0.411955
ColDataImputedSmoteEqual0Point5Erc	DeepFullyConnectedNeuralNetwork_SGD_l1_dropoutFalse_numHiddenLayers12	DeepFullyConnectedNeuralNetwork	SGD	TRUE	FALSE	12	0.752367	0.800705	0.656548	0.384917	0.54186	0.709603	0.438259	0.909996
ColDataSmoteEqual1Erc	DeepFullyConnectedNeuralNetwork_SGD_l1_dropoutFalse_numHiddenLayers12	DeepFullyConnectedNeuralNetwork	SGD	TRUE	FALSE	12	0.491959	0.696087	0.686087	0	0	0	0	1
DbSmoteEqual0Point5Erc	DeepFullyConnectedNeuralNetwork_SGD_l1_dropoutFalse_numHiddenLayers12	DeepFullyConnectedNeuralNetwork	SGD	TRUE	FALSE	12	0.639579	0.631504	0.728388	0	0.780175	0.639579	1	0
DbSmoteEqual1Erc	DeepFullyConnectedNeuralNetwork_SGD_l1_dropoutFalse_numHiddenLayers12	DeepFullyConnectedNeuralNetwork	SGD	TRUE	FALSE	12	0.78105	0.634584	0.845741	0	0.877067	0.78105	1	0
DbSmoteEqual1Erc	DeepFullyConnectedNeuralNetwork_SGD_l1_dropoutFalse_numHiddenLayers12	DeepFullyConnectedNeuralNetwork	SGD	TRUE	FALSE	12	0.78105	0.679671	0.867258	0	0.877067	0.78105	1	0
DiabeticosImputadoMerged	DeepFullyConnectedNeuralNetwork_SGD_l1_dropoutFalse_numHiddenLayers12	DeepFullyConnectedNeuralNetwork	SGD	TRUE	FALSE	12	0.7221	0.778918	0.655029	0.376387	0.582021	0.639509	0.534017	0.828965
MergedColombiaImputed	DeepFullyConnectedNeuralNetwork_SGD_l1_dropoutFalse_numHiddenLayers12	DeepFullyConnectedNeuralNetwork	SGD	TRUE	FALSE	12	0.748591	0.797689	0.653285	0.382779	0.549678	0.667849	0.467039	0.88635
mergedColombiaImputedUpsampled	DeepFullyConnectedNeuralNetwork_SGD_l1_dropoutFalse_numHiddenLayers12	DeepFullyConnectedNeuralNetwork	SGD	TRUE	FALSE	12	0.75717	0.803816	0.646624	0.370068	0.520861	0.68108	0.421667	0.910036
MergedColombiaImputedUpsampledDownsampled	DeepFullyConnectedNeuralNetwork_SGD_l1_dropoutFalse_numHiddenLayers12	DeepFullyConnectedNeuralNetwork	SGD	TRUE	FALSE	12	0.741142	0.798913	0.654599	0.423188	0.619059	0.604898	0.633898	0.794397
MergedImputed	DeepFullyConnectedNeuralNetwork_SGD_l1_dropoutFalse_numHiddenLayers12	DeepFullyConnectedNeuralNetwork	SGD	TRUE	FALSE	12	0.885697	0.925641	0.635052	0.297484	0.339342	0.767525	0.217824	0.989724
MergedImputedUpsampled	DeepFullyConnectedNeuralNetwork_SGD_l1_dropoutFalse_numHiddenLayers12	DeepFullyConnectedNeuralNetwork	SGD	TRUE	FALSE	12	0.861534	0.885285	0.606012	0.385066	0.453761	0.692141	0.337517	0.969165
MergedImputedUpsampledDownsampled	DeepFullyConnectedNeuralNetwork_SGD_l1_dropoutFalse_numHiddenLayers12	DeepFullyConnectedNeuralNetwork	SGD	TRUE	FALSE	12	0.857063	0.884372	0.598926	0.391291	0.464763	0.6735	0.3548	0.963538
NdbSmoteEqual1Erc	DeepFullyConnectedNeuralNetwork_SGD_l1_dropoutFalse_numHiddenLayers12	DeepFullyConnectedNeuralNetwork	SGD	TRUE	FALSE	12	0.601897	0.921623	0.856568	0	0	0	0	1
nodiabeticosMerged	DeepFullyConnectedNeuralNetwork_SGD_l1_dropoutFalse_numHiddenLayers12	DeepFullyConnectedNeuralNetwork	SGD	TRUE	FALSE	12	0.908907	0.933873	0.581756	0	0	0	0	1
DbSmoteEqual1Erc	DeepFullyConnectedNeuralNetwork_SGD_l1_dropoutFalse_numHiddenLayers14	DeepFullyConnectedNeuralNetwork	SGD	TRUE	FALSE	14	0.78105	0.744386	0.901044	0	0.877067	0.78105	1	0
DbSmoteEqual1Erc	DeepFullyConnectedNeuralNetwork_SGD_l1_dropoutFalse_numHiddenLayers3	DeepFullyConnectedNeuralNetwork	SGD	TRUE	FALSE	3	0.804561	0.77242	0.914624	0.332126	0.88155	0.836975	0.931141	0.35302
AllDataAugmentedDownsampledErc	DeepFullyConnectedNeuralNetwork_SGD_l1_dropoutFalse_numHiddenLayers5	DeepFullyConnectedNeuralNetwork	SGD	TRUE	FALSE	5	0.836529	0.887804	0.848036	0.672816	0.852493	0.778879	0.941473	0.730852
AllDataSmoteEqual0Point5Erc	DeepFullyConnectedNeuralNetwork_SGD_l1_dropoutFalse_numHiddenLayers5	DeepFullyConnectedNeuralNetwork	SGD	TRUE	FALSE	5	0.807312	0.898938	0.770322	0.601652	0.754489	0.656485	0.886888	0.767433
AllDataSmoteEqual1Erc	DeepFullyConnectedNeuralNetwork_SGD_l1_dropoutFalse_numHiddenLayers5	DeepFullyConnectedNeuralNetwork	SGD	TRUE	FALSE	5	0.817857	0.885841	0.846374	0.635806	0.825666	0.789739	0.865017	0.770954
COLAugmentedpositivesx2	DeepFullyConnectedNeuralNetwork_SGD_l1_dropoutFalse_numHiddenLayers5	DeepFullyConnectedNeuralNetwork	SGD	TRUE	FALSE	5	0.671963	0.752297	0.874932	0	0.803802	0.671963	1	0
ColDataAugmentedDownsampledErc	DeepFullyConnectedNeuralNetwork_SGD_l1_dropoutFalse_numHiddenLayers5	DeepFullyConnectedNeuralNetwork	SGD	TRUE	FALSE	5	0.706778	0.778753	0.757026	0.414049	0.729502	0.674221	0.794657	0.61975
ColDataImputedSmoteEqual0Point5Erc	DeepFullyConnectedNeuralNetwork_SGD_l1_dropoutFalse_numHiddenLayers5	DeepFullyConnectedNeuralNetwork	SGD	TRUE	FALSE	5	0.750203	0.804619	0.671619	0.414458	0.592429	0.651298	0.54332	0.854023
ColDataSmoteEqual1Erc	DeepFullyConnectedNeuralNetwork_SGD_l1_dropoutFalse_numHiddenLayers5	DeepFullyConnectedNeuralNetwork	SGD	TRUE	FALSE	5	0.682157	0.762476	0.752084	0.36636	0.649824	0.737971	0.580487	0.787151
DbSmoteEqual0Point5Erc	DeepFullyConnectedNeuralNetwork_SGD_l1_dropoutFalse_numHiddenLayers5	DeepFullyConnectedNeuralNetwork	SGD	TRUE	FALSE	5	0.721511	0.764926	0.840934	0.355704	0.798534	0.743081	0.86293	0.470557
DbSmoteEqual1Erc	DeepFullyConnectedNeuralNetwork_SGD_l1_dropoutFalse_numHiddenLayers5	DeepFullyConnectedNeuralNetwork	SGD	TRUE	FALSE	5	0.78105	0.687694	0.87491	0	0.877067	0.78105	1	0
DbSmoteEqual1Erc	DeepFullyConnectedNeuralNetwork_SGD_l1_dropoutFalse_numHiddenLayers5	DeepFullyConnectedNeuralNetwork	SGD	TRUE	FALSE	5	0.78105	0.73041	0.896921	0	0.877067	0.78105	1	0
DiabeticosImputadoMerged	DeepFullyConnectedNeuralNetwork_SGD_l1_dropoutFalse_numHiddenLayers5	DeepFullyConnectedNeuralNetwork	SGD	TRUE	FALSE	5	0.719905	0.77722	0.65337	0.378401	0.589864	0.628225	0.555918	0.813079
MergedColombiaImputed	DeepFullyConnectedNeuralNetwork_SGD_l1_dropoutFalse_numHiddenLayers5	DeepFullyConnectedNeuralNetwork	SGD	TRUE	FALSE	5	0.750085	0.801061	0.657427	0.379781	0.541879	0.681164	0.449886	0.896967
mergedColombiaImputedUpsampled	DeepFullyConnectedNeuralNetwork_SGD_l1_dropoutFalse_numHiddenLayers5	DeepFullyConnectedNeuralNetwork	SGD	TRUE	FALSE	5	0.756889	0.803596	0.643735	0.39052	0.551974	0.652217	0.478441	0.883759
MergedColombiaImputedUpsampledDownsampled	DeepFullyConnectedNeuralNetwork_SGD_l1_dropoutFalse_numHiddenLayers5	DeepFullyConnectedNeuralNetwork	SGD	TRUE	FALSE	5	0.745722	0.79738	0.654573	0.379224	0.548438	0.667593	0.465375	0.884934
MergedImputed	DeepFullyConnectedNeuralNetwork_SGD_l1_dropoutFalse_numHiddenLayers5	DeepFullyConnectedNeuralNetwork	SGD	TRUE	FALSE	5	0.890704	0.924299	0.614134	0.516805	0.579518	0.601749	0.558871	0.942389
MergedImputedUpsampled	DeepFullyConnectedNeuralNetwork_SGD_l1_dropoutFalse_numHiddenLayers5	DeepFullyConnectedNeuralNetwork	SGD	TRUE	FALSE	5	0.858269	0.8791	0.585162	0.365533	0.434839	0.67831	0.319985	0.968831
MergedImputedUpsampledDownsampled	DeepFullyConnectedNeuralNetwork_SGD_l1_dropoutFalse_numHiddenLayers5	DeepFullyConnectedNeuralNetwork	SGD	TRUE	FALSE	5	0.856783	0.885703	0.604891	0.391749	0.465675	0.670173	0.3568	0.962775
NdbSmoteEqual1Erc	DeepFullyConnectedNeuralNetwork_SGD_l1_dropoutFalse_numHiddenLayers5	DeepFullyConnectedNeuralNetwork	SGD	TRUE	FALSE	5	0.839161	0.916424	0.837568	0.681666	0.825909	0.725633	0.958342	0.760332
nodiabeticosMerged	DeepFullyConnectedNeuralNetwork_SGD_l1_dropoutFalse_numHiddenLayers5	DeepFullyConnectedNeuralNetwork	SGD	TRUE	FALSE	5	0.918473	0.934772	0.635143	0.557404	0.602199	0.542013	0.677419	0.942632
DbSmoteEqual1Erc	DeepFullyConnectedNeuralNetwork_SGD_l1_dropoutFalse_numHiddenLayers8	DeepFullyConnectedNeuralNetwork	SGD	TRUE	FALSE	8	0.78105	0.628435	0.855292	0	0.877067	0.78105	1	0
AllDataAugmentedDownsampledErc	DeepFullyConnectedNeuralNetwork_SGD_l1_dropoutTrue_numHiddenLayers1	DeepFullyConnectedNeuralNetwork	SGD	TRUE	TRUE	1	0.850041	0.920347	0.89982	0.699963	0.858398	0.815627	0.905903	0.793789
AllDataSmoteEqual0Point5Erc	DeepFullyConnectedNeuralNetwork_SGD_l1_dropoutTrue_numHiddenLayers1	DeepFullyConnectedNeuralNetwork	SGD	TRUE	TRUE	1	0.820919	0.901851	0.777542	0.615302	0.754703	0.695293	0.825213	0.818766
AllDataSmoteEqual1Erc	DeepFullyConnectedNeuralNetwork_SGD_l1_dropoutTrue_numHiddenLayers1	DeepFullyConnectedNeuralNetwork	SGD	TRUE	TRUE	1	0.838932	0.906559	0.875326	0.677986	0.849212	0.796344	0.909599	0.768651
COLAugmentedpositivesx2	DeepFullyConnectedNeuralNetwork_SGD_l1_dropoutTrue_numHiddenLayers1	DeepFullyConnectedNeuralNetwork	SGD	TRUE	TRUE	1	0.779095	0.854005	0.928682	0.491201	0.837972	0.826187	0.850098	0.63365
ColDataAugmentedDownsampledErc	DeepFullyConnectedNeuralNetwork_SGD_l1_dropoutTrue_numHiddenLayers1	DeepFullyConnectedNeuralNetwork	SGD	TRUE	TRUE	1	0.705966	0.786165	0.765598	0.412349	0.725308	0.677648	0.780179	0.632472
ColDataImputedSmoteEqual0Point5Erc	DeepFullyConnectedNeuralNetwork_SGD_l1_dropoutTrue_numHiddenLayers1	DeepFullyConnectedNeuralNetwork	SGD	TRUE	TRUE	1	0.751623	0.808085	0.678041	0.423638	0.603199	0.646963	0.56498	0.845286
ColDataSmoteEqual1Erc	DeepFullyConnectedNeuralNetwork_SGD_l1_dropoutTrue_numHiddenLayers1	DeepFullyConnectedNeuralNetwork	SGD	TRUE	TRUE	1	0.716757	0.791647	0.781415	0.433615	0.717474	0.727301	0.707909	0.725895
DbSmoteEqual0Point5Erc	DeepFullyConnectedNeuralNetwork_SGD_l1_dropoutTrue_numHiddenLayers1	DeepFullyConnectedNeuralNetwork	SGD	TRUE	TRUE	1	0.71912	0.76386	0.840571	0.357357	0.794229	0.747232	0.847534	0.491247
DbSmoteEqual1Erc	DeepFullyConnectedNeuralNetwork_SGD_l1_dropoutTrue_numHiddenLayers1	DeepFullyConnectedNeuralNetwork	SGD	TRUE	TRUE	1	0.808147	0.765901	0.910695	0.290291	0.886454	0.824233	0.958835	0.270604
DbSmoteEqual1Erc	DeepFullyConnectedNeuralNetwork_SGD_l1_dropoutTrue_numHiddenLayers1	DeepFullyConnectedNeuralNetwork	SGD	TRUE	TRUE	1	0.80797	0.773421	0.914742	0.2779	0.886873	0.821371	0.963727	0.252349
DiabeticosImputadoMerged	DeepFullyConnectedNeuralNetwork_SGD_l1_dropoutTrue_numHiddenLayers1	DeepFullyConnectedNeuralNetwork	SGD	TRUE	TRUE	1	0.721087	0.778057	0.658984	0.380704	0.591089	0.630412	0.556384	0.814668
MergedColombiaImputed	DeepFullyConnectedNeuralNetwork_SGD_l1_dropoutTrue_numHiddenLayers1	DeepFullyConnectedNeuralNetwork	SGD	TRUE	TRUE	1	0.746283	0.80317	0.659884	0.40977	0.593407	0.626608	0.563546	0.835693
mergedColombiaImputedUpsampled	DeepFullyConnectedNeuralNetwork_SGD_l1_dropoutTrue_numHiddenLayers1	DeepFullyConnectedNeuralNetwork	SGD	TRUE	TRUE	1	0.759363	0.802607	0.646191	0.404448	0.567559	0.648649	0.504492	0.875491
MergedColombiaImputedUpsampledDownsampled	DeepFullyConnectedNeuralNetwork_SGD_l1_dropoutTrue_numHiddenLayers1	DeepFullyConnectedNeuralNetwork	SGD	TRUE	TRUE	1	0.749578	0.798483	0.657396	0.402283	0.576207	0.657054	0.513075	0.867019
MergedImputed	DeepFullyConnectedNeuralNetwork_SGD_l1_dropoutTrue_numHiddenLayers1	DeepFullyConnectedNeuralNetwork	SGD	TRUE	TRUE	1	0.898501	0.928695	0.653618	0.52505	0.582019	0.653924	0.524361	0.956776
MergedImputedUpsampled	DeepFullyConnectedNeuralNetwork_SGD_l1_dropoutTrue_numHiddenLayers1	DeepFullyConnectedNeuralNetwork	SGD	TRUE	TRUE	1	0.848507	0.87739	0.58327	0.464125	0.555428	0.555481	0.555375	0.908715
MergedImputedUpsampledDownsampled	DeepFullyConnectedNeuralNetwork_SGD_l1_dropoutTrue_numHiddenLayers1	DeepFullyConnectedNeuralNetwork	SGD	TRUE	TRUE	1	0.85536	0.880164	0.587429	0.412385	0.491556	0.638144	0.399733	0.951949
NdbSmoteEqual1Erc	DeepFullyConnectedNeuralNetwork_SGD_l1_dropoutTrue_numHiddenLayers1	DeepFullyConnectedNeuralNetwork	SGD	TRUE	TRUE	1	0.847128	0.918926	0.838202	0.686869	0.818058	0.777337	0.86328	0.836445
nodiabeticosMerged	DeepFullyConnectedNeuralNetwork_SGD_l1_dropoutTrue_numHiddenLayers1	DeepFullyConnectedNeuralNetwork	SGD	TRUE	TRUE	1	0.928921	0.941043	0.631746	0.417579	0.448721	0.764452	0.317563	0.990193
AllDataAugmentedDownsampledErc	DeepFullyConnectedNeuralNetwork_SGD_l1_dropoutTrue_numHiddenLayers12	DeepFullyConnectedNeuralNetwork	SGD	TRUE	TRUE	12	0.530789	0.713067	0.702529	0.0645057	0.150355	0.822055	0.0827447	0.981964
AllDataSmoteEqual0Point5Erc	DeepFullyConnectedNeuralNetwork_SGD_l1_dropoutTrue_numHiddenLayers12	DeepFullyConnectedNeuralNetwork	SGD	TRUE	TRUE	12	0.667152	0.75584	0.620245	0.00474649	0.00829667	0.776471	0.00417062	0.999398
AllDataSmoteEqual1Erc	DeepFullyConnectedNeuralNetwork_SGD_l1_dropoutTrue_numHiddenLayers12	DeepFullyConnectedNeuralNetwork	SGD	TRUE	TRUE	12	0.498631	0.784564	0.739055	0	0.665449	0.498631	1	0
COLAugmentedpositivesx2	DeepFullyConnectedNeuralNetwork_SGD_l1_dropoutTrue_numHiddenLayers12	DeepFullyConnectedNeuralNetwork	SGD	TRUE	TRUE	12	0.671963	0.698871	0.797558	0	0.803802	0.671963	1	0
ColDataAugmentedDownsampledErc	DeepFullyConnectedNeuralNetwork_SGD_l1_dropoutTrue_numHiddenLayers12	DeepFullyConnectedNeuralNetwork	SGD	TRUE	TRUE	12	0.497565	0.627008	0.597204	0	0.664499	0.497565	1	0
ColDataImputedSmoteEqual0Point5Erc	DeepFullyConnectedNeuralNetwork_SGD_l1_dropoutTrue_numHiddenLayers12	DeepFullyConnectedNeuralNetwork	SGD	TRUE	TRUE	12	0.665855	0.747292	0.542812	0	0	0	0	1
ColDataSmoteEqual1Erc	DeepFullyConnectedNeuralNetwork_SGD_l1_dropoutTrue_numHiddenLayers12	DeepFullyConnectedNeuralNetwork	SGD	TRUE	TRUE	12	0.492517	0.618337	0.610065	0.00107119	0.00279135	0.823529	0.00139804	0.999691
DbSmoteEqual0Point5Erc	DeepFullyConnectedNeuralNetwork_SGD_l1_dropoutTrue_numHiddenLayers12	DeepFullyConnectedNeuralNetwork	SGD	TRUE	TRUE	12	0.639579	0.53496	0.660617	0	0.780175	0.639579	1	0
DbSmoteEqual1Erc	DeepFullyConnectedNeuralNetwork_SGD_l1_dropoutTrue_numHiddenLayers12	DeepFullyConnectedNeuralNetwork	SGD	TRUE	TRUE	12	0.78105	0.75703	0.908605	0	0.877067	0.78105	1	0
DbSmoteEqual1Erc	DeepFullyConnectedNeuralNetwork_SGD_l1_dropoutTrue_numHiddenLayers12	DeepFullyConnectedNeuralNetwork	SGD	TRUE	TRUE	12	0.78105	0.625008	0.84844	0	0.877067	0.78105	1	0
DiabeticosImputadoMerged	DeepFullyConnectedNeuralNetwork_SGD_l1_dropoutTrue_numHiddenLayers12	DeepFullyConnectedNeuralNetwork	SGD	TRUE	TRUE	12	0.673139	0.631764	0.520046	0.219275	0.423466	0.586634	0.331314	0.867355
MergedColombiaImputed	DeepFullyConnectedNeuralNetwork_SGD_l1_dropoutTrue_numHiddenLayers12	DeepFullyConnectedNeuralNetwork	SGD	TRUE	TRUE	12	0.671464	0.762655	0.548979	0	0	0	0	1
mergedColombiaImputedUpsampled	DeepFullyConnectedNeuralNetwork_SGD_l1_dropoutTrue_numHiddenLayers12	DeepFullyConnectedNeuralNetwork	SGD	TRUE	TRUE	12	0.686987	0.768556	0.556615	0	0	0	0	1
MergedColombiaImputedUpsampledDownsampled	DeepFullyConnectedNeuralNetwork_SGD_l1_dropoutTrue_numHiddenLayers12	DeepFullyConnectedNeuralNetwork	SGD	TRUE	TRUE	12	0.668193	0.715364	0.545987	0	0	0	0	1
MergedImputed	DeepFullyConnectedNeuralNetwork_SGD_l1_dropoutTrue_numHiddenLayers12	DeepFullyConnectedNeuralNetwork	SGD	TRUE	TRUE	12	0.865233	0.898815	0.453627	0	0	0	0	1
MergedImputedUpsampled	DeepFullyConnectedNeuralNetwork_SGD_l1_dropoutTrue_numHiddenLayers12	DeepFullyConnectedNeuralNetwork	SGD	TRUE	TRUE	12	0.829603	0.867209	0.523506	0	0	0	0	1
MergedImputedUpsampledDownsampled	DeepFullyConnectedNeuralNetwork_SGD_l1_dropoutTrue_numHiddenLayers12	DeepFullyConnectedNeuralNetwork	SGD	TRUE	TRUE	12	0.825089	0.867793	0.502036	0	0	0	0	1
NdbSmoteEqual1Erc	DeepFullyConnectedNeuralNetwork_SGD_l1_dropoutTrue_numHiddenLayers12	DeepFullyConnectedNeuralNetwork	SGD	TRUE	TRUE	12	0.601897	0.807622	0.696774	0	0	0	0	1
nodiabeticosMerged	DeepFullyConnectedNeuralNetwork_SGD_l1_dropoutTrue_numHiddenLayers12	DeepFullyConnectedNeuralNetwork	SGD	TRUE	TRUE	12	0.908907	0.922088	0.450269	0	0	0	0	1
DbSmoteEqual1Erc	DeepFullyConnectedNeuralNetwork_SGD_l1_dropoutTrue_numHiddenLayers14	DeepFullyConnectedNeuralNetwork	SGD	TRUE	TRUE	14	0.78105	0.738518	0.900026	0	0.877067	0.78105	1	0
DbSmoteEqual1Erc	DeepFullyConnectedNeuralNetwork_SGD_l1_dropoutTrue_numHiddenLayers3	DeepFullyConnectedNeuralNetwork	SGD	TRUE	TRUE	3	0.806971	0.767565	0.911959	0.260827	0.886852	0.81787	0.968543	0.230604
AllDataAugmentedDownsampledErc	DeepFullyConnectedNeuralNetwork_SGD_l1_dropoutTrue_numHiddenLayers5	DeepFullyConnectedNeuralNetwork	SGD	TRUE	TRUE	5	0.786976	0.887237	0.855363	0.574078	0.777836	0.815797	0.743252	0.831005
AllDataSmoteEqual0Point5Erc	DeepFullyConnectedNeuralNetwork_SGD_l1_dropoutTrue_numHiddenLayers5	DeepFullyConnectedNeuralNetwork	SGD	TRUE	TRUE	5	0.66616	0.900821	0.756849	0	0	0	0	1
AllDataSmoteEqual1Erc	DeepFullyConnectedNeuralNetwork_SGD_l1_dropoutTrue_numHiddenLayers5	DeepFullyConnectedNeuralNetwork	SGD	TRUE	TRUE	5	0.820246	0.884187	0.842516	0.640679	0.835631	0.767977	0.916357	0.724659
COLAugmentedpositivesx2	DeepFullyConnectedNeuralNetwork_SGD_l1_dropoutTrue_numHiddenLayers5	DeepFullyConnectedNeuralNetwork	SGD	TRUE	TRUE	5	0.671963	0.752844	0.868082	0	0.803802	0.671963	1	0
ColDataAugmentedDownsampledErc	DeepFullyConnectedNeuralNetwork_SGD_l1_dropoutTrue_numHiddenLayers5	DeepFullyConnectedNeuralNetwork	SGD	TRUE	TRUE	5	0.57295	0.623609	0.619967	0.144073	0.45131	0.625587	0.352977	0.790792
ColDataImputedSmoteEqual0Point5Erc	DeepFullyConnectedNeuralNetwork_SGD_l1_dropoutTrue_numHiddenLayers5	DeepFullyConnectedNeuralNetwork	SGD	TRUE	TRUE	5	0.754261	0.807639	0.674168	0.416172	0.587487	0.668994	0.523684	0.869972
ColDataSmoteEqual1Erc	DeepFullyConnectedNeuralNetwork_SGD_l1_dropoutTrue_numHiddenLayers5	DeepFullyConnectedNeuralNetwork	SGD	TRUE	TRUE	5	0.634113	0.684875	0.669756	0.268786	0.628247	0.649265	0.608548	0.660514
DbSmoteEqual0Point5Erc	DeepFullyConnectedNeuralNetwork_SGD_l1_dropoutTrue_numHiddenLayers5	DeepFullyConnectedNeuralNetwork	SGD	TRUE	TRUE	5	0.68413	0.681572	0.760726	0.208687	0.789527	0.687944	0.926308	0.254377
DbSmoteEqual1Erc	DeepFullyConnectedNeuralNetwork_SGD_l1_dropoutTrue_numHiddenLayers5	DeepFullyConnectedNeuralNetwork	SGD	TRUE	TRUE	5	0.78105	0.568417	0.826125	0	0.877067	0.78105	1	0
DbSmoteEqual1Erc	DeepFullyConnectedNeuralNetwork_SGD_l1_dropoutTrue_numHiddenLayers5	DeepFullyConnectedNeuralNetwork	SGD	TRUE	TRUE	5	0.78105	0.762853	0.910957	0	0.877067	0.78105	1	0
DiabeticosImputadoMerged	DeepFullyConnectedNeuralNetwork_SGD_l1_dropoutTrue_numHiddenLayers5	DeepFullyConnectedNeuralNetwork	SGD	TRUE	TRUE	5	0.724802	0.777438	0.658586	0.362222	0.551458	0.673387	0.466915	0.871326
MergedColombiaImputed	DeepFullyConnectedNeuralNetwork_SGD_l1_dropoutTrue_numHiddenLayers5	DeepFullyConnectedNeuralNetwork	SGD	TRUE	TRUE	5	0.747301	0.80244	0.658415	0.362373	0.519742	0.691858	0.416202	0.909302
mergedColombiaImputedUpsampled	DeepFullyConnectedNeuralNetwork_SGD_l1_dropoutTrue_numHiddenLayers5	DeepFullyConnectedNeuralNetwork	SGD	TRUE	TRUE	5	0.756439	0.803156	0.643071	0.414402	0.585907	0.626201	0.550485	0.850278
MergedColombiaImputedUpsampledDownsampled	DeepFullyConnectedNeuralNetwork_SGD_l1_dropoutTrue_numHiddenLayers5	DeepFullyConnectedNeuralNetwork	SGD	TRUE	TRUE	5	0.747971	0.798141	0.655527	0.397827	0.572558	0.654721	0.508717	0.866779
MergedImputed	DeepFullyConnectedNeuralNetwork_SGD_l1_dropoutTrue_numHiddenLayers5	DeepFullyConnectedNeuralNetwork	SGD	TRUE	TRUE	5	0.865233	0.922216	0.586106	0	0	0	0	1
MergedImputedUpsampled	DeepFullyConnectedNeuralNetwork_SGD_l1_dropoutTrue_numHiddenLayers5	DeepFullyConnectedNeuralNetwork	SGD	TRUE	TRUE	5	0.830142	0.87867	0.575686	0.00598646	0.00744062	0.866667	0.00373635	0.999882
MergedImputedUpsampledDownsampled	DeepFullyConnectedNeuralNetwork_SGD_l1_dropoutTrue_numHiddenLayers5	DeepFullyConnectedNeuralNetwork	SGD	TRUE	TRUE	5	0.85683	0.882745	0.592623	0.427836	0.50758	0.637004	0.421867	0.949038
NdbSmoteEqual1Erc	DeepFullyConnectedNeuralNetwork_SGD_l1_dropoutTrue_numHiddenLayers5	DeepFullyConnectedNeuralNetwork	SGD	TRUE	TRUE	5	0.75111	0.898997	0.792088	0.440635	0.603668	0.824543	0.476126	0.932988
nodiabeticosMerged	DeepFullyConnectedNeuralNetwork_SGD_l1_dropoutTrue_numHiddenLayers5	DeepFullyConnectedNeuralNetwork	SGD	TRUE	TRUE	5	0.908907	0.941542	0.601283	0	0	0	0	1
DbSmoteEqual1Erc	DeepFullyConnectedNeuralNetwork_SGD_l1_dropoutTrue_numHiddenLayers8	DeepFullyConnectedNeuralNetwork	SGD	TRUE	TRUE	8	0.78105	0.764372	0.911604	0	0.877067	0.78105	1	0

## Sheet: KNC
project_name	model_name	model_architecture	Metric	Number_of_neighbors	Hiperparameter_search	accuracy	areaUnderCurve	averagePrecision	cohensK	f1Score	precision	recall	specificity
ColDataSmoteEqual1Erc	KNC_metric-cityblock_n_neighbors-2_p-1_GridSearch	KNC	Cityblock	2	GridSearch	0.725077	0.792489	0.733322	0.451962	0.696398	0.793235	0.620631	0.832938
DbSmoteEqual0Point5Erc	KNC_metric-cityblock_n_neighbors-2_p-1_GridSearch	KNC	Cityblock	2	GridSearch	0.775143	0.812188	0.832717	0.52986	0.815298	0.858868	0.775934	0.77374
DbSmoteEqual1Erc	KNC_metric-cityblock_n_neighbors-2_p-1_GridSearch	KNC	Cityblock	2	GridSearch	0.858814	0.816409	0.908057	0.593485	0.90907	0.91461	0.903597	0.69906
DbSmoteEqual1Erc	KNC_metric-cityblock_n_neighbors-2_p-1_GridSearch	KNC	Cityblock	2	GridSearch	0.858814	0.816409	0.908057	0.593485	0.90907	0.91461	0.903597	0.69906
mergedColombiaImputedUpsampled	KNC_metric-cityblock_n_neighbors-42_p-1_GridSearch	KNC	Cityblock	42	GridSearch	0.761782	0.807715	0.643681	0.389426	0.541261	0.681298	0.448976	0.904306
ColDataImputedSmoteEqual0Point5Erc	KNC_metric-cityblock_n_neighbors-62_p-1_GridSearch	KNC	Cityblock	62	GridSearch	0.752773	0.807003	0.671858	0.40322	0.570556	0.679922	0.491498	0.883889
MergedColombiaImputedUpsampledDownsampled	KNC_metric-cityblock_n_neighbors-62_p-1_GridSearch	KNC	Cityblock	62	GridSearch	0.750783	0.801213	0.654803	0.392982	0.559625	0.67639	0.47724	0.886618
ColDataImputedSmoteEqual0Point5Erc	KNC_metric-cityblock_n_neighbors-78_p-2017.192023353962_RandomSearch	KNC	Cityblock	78	RandomSearch	0.753653	0.807628	0.674791	0.40589	0.572936	0.680881	0.494534	0.883685
MergedColombiaImputed	KNC_metric-cityblock_n_neighbors-82_p-1_GridSearch	KNC	Cityblock	82	GridSearch	0.75056	0.803312	0.65717	0.392095	0.560105	0.665813	0.483364	0.881294
MergedColombiaImputed	KNC_metric-cityblock_n_neighbors-96_p-9218.742350231169_RandomSearch	KNC	Cityblock	96	RandomSearch	0.751918	0.803838	0.658409	0.394098	0.5605	0.670504	0.481504	0.884226
ColDataAugmentedDownsampledErc	KNC_metric-cosine_n_neighbors-62_p-1_GridSearch	KNC	Cosine	62	GridSearch	0.724533	0.798674	0.774961	0.449178	0.729501	0.713228	0.746533	0.702746
DiabeticosImputadoMerged	KNC_metric-cosine_n_neighbors-62_p-1_GridSearch	KNC	Cosine	62	GridSearch	0.727165	0.782184	0.64721	0.375239	0.568607	0.665625	0.496272	0.858353
DiabeticosImputadoMerged	KNC_metric-cosine_n_neighbors-84_p-999.7491581800289_RandomSearch	KNC	Cosine	84	RandomSearch	0.725646	0.782045	0.648146	0.373693	0.569536	0.659914	0.500932	0.853323
ColDataAugmentedDownsampledErc	KNC_metric-cosine_n_neighbors-89_p-3337.0861113902183_RandomSearch	KNC	Cosine	89	RandomSearch	0.7222	0.799194	0.777867	0.444567	0.729927	0.706916	0.754486	0.690226
ColDataSmoteEqual1Erc	KNC_metric-euclidean_n_neighbors-3_p-7219.987722668247_RandomSearch	KNC	Euclidean	3	RandomSearch	0.743088	0.800837	0.74635	0.485293	0.757935	0.726939	0.791692	0.692895
DbSmoteEqual1Erc	KNC_metric-euclidean_n_neighbors-3_p-7219.987722668247_RandomSearch	KNC	Euclidean	3	RandomSearch	0.863928	0.82273	0.91191	0.540396	0.917224	0.873765	0.965232	0.50255
DbSmoteEqual1Erc	KNC_metric-euclidean_n_neighbors-3_p-7219.987722668247_RandomSearch	KNC	Euclidean	3	RandomSearch	0.863928	0.82273	0.91191	0.540396	0.917224	0.873765	0.965232	0.50255
mergedColombiaImputedUpsampled	KNC_metric-euclidean_n_neighbors-50_p-5247.746602583891_RandomSearch	KNC	Euclidean	50	RandomSearch	0.758632	0.806787	0.642858	0.383084	0.537799	0.671237	0.448617	0.899885
MergedColombiaImputedUpsampledDownsampled	KNC_metric-euclidean_n_neighbors-73_p-4494.506741382034_RandomSearch	KNC	Euclidean	73	RandomSearch	0.751024	0.801587	0.655259	0.398911	0.568324	0.669072	0.493947	0.878682
nodiabeticosMerged	KNC_metric-nan_euclidean_n_neighbors-22_p-1_GridSearch	KNC	Euclidean	22	GridSearch	0.930978	0.931632	0.615288	0.501509	0.53681	0.69053	0.439068	0.980279
DbSmoteEqual0Point5Erc	KNC_metric-nan_euclidean_n_neighbors-3_p-4251.558744912447_RandomSearch	KNC	Euclidean	3	RandomSearch	0.790631	0.81822	0.84105	0.523009	0.845861	0.799282	0.898206	0.599735

## Sheet: Log regression
project_name	model_name	model_architecture	Penalty	C	Solver	Hiperparameter_search	accuracy	areaUnderCurve	averagePrecision	cohensK	f1Score	precision	recall	specificity
DbSmoteEqual1Erc	LogRegression_penalty-l2_C-0.05061583846218687_solver-lbfgs_RandomSearch	LogRegression	L2	0.0506158	Lbfgs	RandomSearch	0.807147	0.771937	0.913879	0.284583	0.885954	0.823203	0.959061	0.265235
DbSmoteEqual1Erc	LogRegression_penalty-l2_C-0.1_solver-liblinear_GridSearch	LogRegression	L2	0.1	Liblinear	GridSearch	0.807147	0.771944	0.913881	0.285109	0.88593	0.823328	0.958835	0.26604

## Sheet: RFC
project_name	model_name	model_architecture	Number_estimators	Max_depth	Hiperparameter_search	accuracy	areaUnderCurve	averagePrecision	cohensK	f1Score	precision	recall	specificity
DbSmoteEqual1Erc	RFC_n_estimators-388_max_depth-35_RandomSearch	RFC	388	35	RandomSearch	0.895257	0.93784	0.978585	0.6653	0.935096	0.906056	0.96606	0.642685
DbSmoteEqual1Erc	RFC_n_estimators-500_max_depth-20_GridSearch	RFC	500	20	GridSearch	0.885852	0.926147	0.975287	0.617479	0.930384	0.888349	0.976595	0.562148

## Sheet: SVC
project_name	model_name	model_architecture	C	Kernel	Gamma	Hiperparameter_search	accuracy	areaUnderCurve	averagePrecision	cohensK	f1Score	precision	recall	specificity
DiabeticosImputadoMerged	SVC_C-0.1_kernel-linear_gamma-scale_GridSearch	SVC	0.1	linear	Scale	GridSearch	0.719905	0.773019	0.652386	0.353729	0.548571	0.659254	0.469711	0.86206
