# Supplementary material for: Search AI: a Machine Learning algorithm for chronic kidney disease risk detection using eight readily available clinical features
Source: Research Square preprint supplement (doi:10.21203/rs.3.rs-7888843/v1), 2025-11-13
Supplement: Supplementary file 3 [file Letter from ethics commitee Medisinu.pdf › Additional File 4_ IRB-Ethics Committee/Letter from ethics commitee Medisinu.pdf]

## CIRCULAR EXTERNA N° GCL-202-004

Montería, día (28), mes (05), año (25)

**Dirigido a:** Dr. Walberto Buelvas

**Asunto:** Aprobación del protocolo de investigación

Estimado (s) destinatario (s),

Por medio de la presente, me permito informar que el protocolo de investigación titulado:

**"Detección del riesgo de padecer enfermedad renal crónica (ERC) en pacientes asintomáticos utilizando modelos predictivos de Inteligencia Artificial (IA) a partir de datos clínicos de rutina"**, presentado por usted para evaluación ante este Comité de Ética, ha sido revisado en sesión ordinaria llevada a cabo el día 27 de mayo de 2025.

Después de un análisis detallado de los aspectos éticos, metodológicos y técnicos del estudio, se informa que el protocolo ha sido aprobado por unanimidad por los miembros del comité.

Sin otro particular, quedamos atentos a cualquier información adicional o modificación relevante que deba ser notificada durante la ejecución del estudio, conforme a las normativas vigentes.

Un cordial saludo,



**Sheila Rosa Solis Solano**  
**Presidente Comité de ética Medisinú IPS**  
**subdirectorgestiónclinica@medisinu.com**
